# Supplementary material for: Prevalence of hepatitis E virus in China from 1997 to 2022: a systematic review and meta-analysis
Source: PubMed Central journal article supplement (PMC10512461; doi:10.3389/fpubh.2023.1243408), 2023-09-07
Supplement: Data_Sheet_1.pdf [file Data_Sheet_1.pdf]

## *Supplementary Material*

### **Prevalence of hepatitis E virus in China from 1997 to 2022: a systematic review and meta-analysis**

**Kexin Cao<sup>1</sup>†, BS; Xiaoyue Wu<sup>1</sup>†, MD; Mengya Yang<sup>1</sup>†, BS; Can Chen<sup>1</sup>, PHD; Xiaobao Zhang<sup>1</sup>, MD; Daixi Jiang<sup>1</sup>, MD; Yuxia Du<sup>1</sup>, MD; Mengsha Chen<sup>1</sup>, BS; Yue You<sup>1</sup>, BS; Wenkai Zhou<sup>1</sup>, BS; Jiaxing Qi<sup>1</sup>, BS; Dingmo Chen<sup>1</sup>, BS; Rui Yan<sup>2</sup>, MD; Ziping Miao<sup>2</sup>\*, PhD; Shigui Yang<sup>1</sup>\*, PhD**

<sup>1</sup>Department of Emergency Medicine, Second Affiliated Hospital, Department of Public Health, State Key Laboratory for Diagnosis and Treatment of Infectious Diseases. The key Laboratory of Intelligent Preventive Medicine of Zhejiang Province, Zhejiang University School of Medicine, Hangzhou, China;

<sup>2</sup>Zhejiang Provincial Centre for Disease Control and Prevention, Hangzhou, China; †: These authors contributed equally to this work and share first authorship.

**\* Correspondence author:**

Correspond to Prof Shigui Yang, PhD, Email: yangshigui@zju.edu.cn; Telephone: 13605705640, Address: 866 Yuhangtang Road, Hangzhou, China.

Correspond to Prof Ziping Miao, Email: zpmiao@cdc.zj.cn; Telephone: 13606505901, Address: 3399 Binsheng Road, Hangzhou, China.

\*: These authors contributed equally.

## **1 Supplementary Figures and Tables**

### **1.1 Supplementary Figures**

| Study         | Events | Total  | Proportion | 95%-CI (common)  | Weight (common) | Weight (random) |
|---------------|--------|--------|------------|------------------|-----------------|-----------------|
| Zhang ZX-2003 | 210    | 574    | 0.3659     | [0.3264; 0.4067] | 0.1%            | 0.7%            |
| AYIGuLi-2010  | 13     | 151    | 0.0861     | [0.0466; 0.1427] | 0.0%            | 0.6%            |
| AI X-2009     | 5588   | 12555  | 0.4451     | [0.4364; 0.4538] | 2.1%            | 0.7%            |
| Bao ZY-2013   | 28     | 180    | 0.1556     | [0.1059; 0.2169] | 0.0%            | 0.6%            |
| Bi L-2008     | 156    | 1204   | 0.1296     | [0.1111; 0.1499] | 0.2%            | 0.7%            |
| Bo QN-2018    | 127    | 1019   | 0.1246     | [0.1050; 0.1465] | 0.2%            | 0.7%            |
| Cai YS-2013   | 230    | 510    | 0.4510     | [0.4072; 0.4953] | 0.1%            | 0.7%            |
| Cao HJ-2004   | 881    | 2290   | 0.3847     | [0.3647; 0.4050] | 0.4%            | 0.7%            |
| Cao HJ-2004   | 146    | 189    | 0.7725     | [0.7060; 0.8302] | 0.0%            | 0.6%            |
| Shen JY-2007  | 749    | 1570   | 0.4771     | [0.4521; 0.5021] | 0.3%            | 0.7%            |
| Chen XM-2014  | 281    | 868    | 0.3237     | [0.2927; 0.3560] | 0.1%            | 0.7%            |
| Ning LF-2008  | 1086   | 3561   | 0.3050     | [0.2899; 0.3204] | 0.6%            | 0.7%            |
| Chen YZ-2006  | 254    | 1084   | 0.2343     | [0.2094; 0.2607] | 0.2%            | 0.7%            |
| Cheng Y-2007  | 10     | 140    | 0.0714     | [0.0348; 0.1274] | 0.0%            | 0.6%            |
| Du JY-2014    | 295    | 952    | 0.3099     | [0.2806; 0.3403] | 0.2%            | 0.7%            |
| Du L-2013     | 7      | 235    | 0.0298     | [0.0121; 0.0604] | 0.0%            | 0.6%            |
| Fan LZ-2012   | 0      | 158    | 0.0000     | [0.0000; 0.0231] | 0.0%            | 0.6%            |
| You QZ-2019   | 1113   | 5552   | 0.2005     | [0.1900; 0.2112] | 0.9%            | 0.7%            |
| Gao DY-2004   | 1804   | 6988   | 0.2582     | [0.2479; 0.2686] | 1.2%            | 0.7%            |
| Gao XL-2002   | 1      | 182    | 0.0055     | [0.0001; 0.0302] | 0.0%            | 0.6%            |
| Gong YH-2005  | 134    | 144    | 0.9306     | [0.8760; 0.9662] | 0.0%            | 0.6%            |
| Gu HY-2013    | 505    | 6258   | 0.0807     | [0.0741; 0.0877] | 1.0%            | 0.7%            |
| Yao XF-2013   | 806    | 2012   | 0.4006     | [0.3791; 0.4224] | 0.3%            | 0.7%            |
| He YW-2018    | 15     | 35857  | 0.0004     | [0.0002; 0.0007] | 6.0%            | 0.7%            |
| Wu Y-2016     | 482    | 2206   | 0.2185     | [0.2014; 0.2363] | 0.4%            | 0.7%            |
| Wu JY-2016    | 440    | 1720   | 0.2558     | [0.2353; 0.2771] | 0.3%            | 0.7%            |
| Wu JY-2016    | 317    | 611    | 0.5188     | [0.4784; 0.5591] | 0.1%            | 0.7%            |
| Hu AQ-2010    | 377    | 2019   | 0.1867     | [0.1699; 0.2044] | 0.3%            | 0.7%            |
| Zhou X-2015   | 124    | 912    | 0.1360     | [0.1144; 0.1599] | 0.2%            | 0.7%            |
| Huang GY-2009 | 1013   | 3044   | 0.3328     | [0.3160; 0.3498] | 0.5%            | 0.7%            |
| Yao MF-2007   | 635    | 1316   | 0.4825     | [0.4552; 0.5099] | 0.2%            | 0.7%            |
| Huang SY-2020 | 120    | 648    | 0.1852     | [0.1560; 0.2173] | 0.1%            | 0.7%            |
| Huang SM-2017 | 273    | 5345   | 0.0511     | [0.0453; 0.0573] | 0.9%            | 0.7%            |
| Huang XY-2012 | 501    | 2250   | 0.2227     | [0.2056; 0.2404] | 0.4%            | 0.7%            |
| Meng ZH-2005  | 413    | 980    | 0.4214     | [0.3903; 0.4531] | 0.2%            | 0.7%            |
| Lu B-2008     | 208    | 1060   | 0.1962     | [0.1727; 0.2214] | 0.2%            | 0.7%            |
| Wang FD-2004  | 394    | 850    | 0.4635     | [0.4296; 0.4977] | 0.1%            | 0.7%            |
| Zheng YJ-2005 | 573    | 852    | 0.6725     | [0.6399; 0.7040] | 0.1%            | 0.7%            |
| Zhu JF-2007   | 29     | 176    | 0.1648     | [0.1132; 0.2280] | 0.0%            | 0.6%            |
| Kong DG-2017  | 825    | 1945   | 0.4242     | [0.4021; 0.4465] | 0.3%            | 0.7%            |
| Li B-2003     | 14     | 178    | 0.0787     | [0.0437; 0.1284] | 0.0%            | 0.6%            |
| Li JT-2014    | 197    | 456    | 0.4320     | [0.3860; 0.4789] | 0.1%            | 0.7%            |
| Bo QN-2019    | 259    | 1700   | 0.1524     | [0.1356; 0.1703] | 0.3%            | 0.7%            |
| Li L-2012     | 15     | 149    | 0.1007     | [0.0574; 0.1606] | 0.0%            | 0.6%            |
| Li MY-2008    | 169    | 768    | 0.2201     | [0.1912; 0.2510] | 0.1%            | 0.7%            |
| Li WJ-2007    | 337    | 1553   | 0.2170     | [0.1967; 0.2383] | 0.3%            | 0.7%            |
| Li W-2018     | 4923   | 10008  | 0.4919     | [0.4821; 0.5018] | 1.7%            | 0.7%            |
| Li YB-2004    | 572    | 3336   | 0.1715     | [0.1588; 0.1847] | 0.6%            | 0.7%            |
| Wang HR-2007  | 1089   | 3931   | 0.2770     | [0.2631; 0.2913] | 0.7%            | 0.7%            |
| Lin CY-2009   | 403    | 4959   | 0.0813     | [0.0738; 0.0892] | 0.8%            | 0.7%            |
| Liu JY-2016   | 57     | 2127   | 0.0268     | [0.0204; 0.0346] | 0.4%            | 0.7%            |
| Liu K-2009    | 223    | 1365   | 0.1634     | [0.1441; 0.1841] | 0.2%            | 0.7%            |
| Liu XG-2007   | 610    | 1585   | 0.3849     | [0.3608; 0.4093] | 0.3%            | 0.7%            |
| Liu XG-2008   | 571    | 1351   | 0.4226     | [0.3961; 0.4495] | 0.2%            | 0.7%            |
| Yu LM-2001    | 54     | 417    | 0.1295     | [0.0988; 0.1656] | 0.1%            | 0.7%            |
| Lu B-2008     | 373    | 828    | 0.4505     | [0.4162; 0.4851] | 0.1%            | 0.7%            |
| Lu J-2009     | 259    | 1977   | 0.1310     | [0.1164; 0.1467] | 0.3%            | 0.7%            |
| Lu YH-2006    | 421    | 663    | 0.6350     | [0.5971; 0.6717] | 0.1%            | 0.7%            |
| Luo YX-2005   | 215    | 3864   | 0.0556     | [0.0486; 0.0633] | 0.6%            | 0.7%            |
| Ma TW-2013    | 30     | 324    | 0.0926     | [0.0633; 0.1295] | 0.1%            | 0.7%            |
| Nong CS-2007  | 172    | 377    | 0.4562     | [0.4051; 0.5080] | 0.1%            | 0.7%            |
| Pan TJ-2002   | 0      | 1580   | 0.0000     | [0.0000; 0.0023] | 0.3%            | 0.7%            |
| Pan YL-2021   | 0      | 103794 | 0.0000     | [0.0000; 0.0000] | 17.3%           | 0.7%            |
| Pu MH-2008    | 408    | 1360   | 0.3000     | [0.2757; 0.3251] | 0.2%            | 0.7%            |
| Sang LY-2007  | 1107   | 3701   | 0.2991     | [0.2844; 0.3141] | 0.6%            | 0.7%            |
| Shao HW-2009  | 79     | 830    | 0.0952     | [0.0761; 0.1172] | 0.1%            | 0.7%            |
| Shao JS-2006  | 2565   | 14020  | 0.1830     | [0.1766; 0.1895] | 2.3%            | 0.7%            |
| Sun ZH-2017   | 2555   | 47852  | 0.0534     | [0.0514; 0.0554] | 8.0%            | 0.7%            |
| Sun Z-2014    | 471    | 1483   | 0.3176     | [0.2939; 0.3420] | 0.2%            | 0.7%            |
| Tang WF-2014  | 139    | 303    | 0.4587     | [0.4016; 0.5167] | 0.1%            | 0.7%            |
| Tian JS-2007  | 35     | 778    | 0.0450     | [0.0315; 0.0620] | 0.1%            | 0.7%            |
| Wang DM-2016  | 28     | 1000   | 0.0280     | [0.0187; 0.0402] | 0.2%            | 0.7%            |
| Wang FY-1999  | 33     | 575    | 0.0574     | [0.0398; 0.0797] | 0.1%            | 0.7%            |
| Wang L-2013   | 1788   | 4396   | 0.4067     | [0.3922; 0.4214] | 0.7%            | 0.7%            |
| Wang YC-2005  | 297    | 409    | 0.7262     | [0.6802; 0.7688] | 0.1%            | 0.7%            |
| Zhu JF-2006   | 72     | 94     | 0.7660     | [0.6674; 0.8471] | 0.0%            | 0.6%            |
| Wang Q-2014   | 422    | 2812   | 0.1501     | [0.1371; 0.1638] | 0.5%            | 0.7%            |
| Wang ZZ-2007  | 1105   | 1234   | 0.8955     | [0.8770; 0.9120] | 0.2%            | 0.7%            |
| Wang RL-2012  | 509    | 2028   | 0.2510     | [0.2322; 0.2705] | 0.3%            | 0.7%            |
| Wu CH-2003    | 4      | 148    | 0.0270     | [0.0074; 0.0678] | 0.0%            | 0.6%            |
| Wu XX-2021    | 169    | 836    | 0.2022     | [0.1754; 0.2310] | 0.1%            | 0.7%            |
| Wu JY-2017    | 310    | 1459   | 0.2125     | [0.1917; 0.2344] | 0.2%            | 0.7%            |
| Xia XW-2015   | 914    | 3513   | 0.2602     | [0.2457; 0.2750] | 0.6%            | 0.7%            |
| Xiao ZB-2022  | 1217   | 4661   | 0.2611     | [0.2485; 0.2740] | 0.8%            | 0.7%            |
| Xie SF-2014   | 1019   | 2614   | 0.3898     | [0.3711; 0.4088] | 0.4%            | 0.7%            |
| Xing XM-2011  | 185    | 812    | 0.2278     | [0.1994; 0.2583] | 0.1%            | 0.7%            |
| Xu PN-2014    | 91     | 415    | 0.2193     | [0.1804; 0.2622] | 0.1%            | 0.7%            |
| Yan GX-2004   | 1269   | 3047   | 0.4165     | [0.3989; 0.4342] | 0.5%            | 0.7%            |
| Yang F-2012   | 893    | 3771   | 0.2368     | [0.2233; 0.2507] | 0.6%            | 0.7%            |
| Yang B-2013   | 40     | 597    | 0.0670     | [0.0483; 0.0901] | 0.1%            | 0.7%            |
| Yang LL-2015  | 966    | 3654   | 0.2644     | [0.2501; 0.2790] | 0.6%            | 0.7%            |
| Yin YZ-2001   | 63     | 676    | 0.0932     | [0.0724; 0.1177] | 0.1%            | 0.7%            |

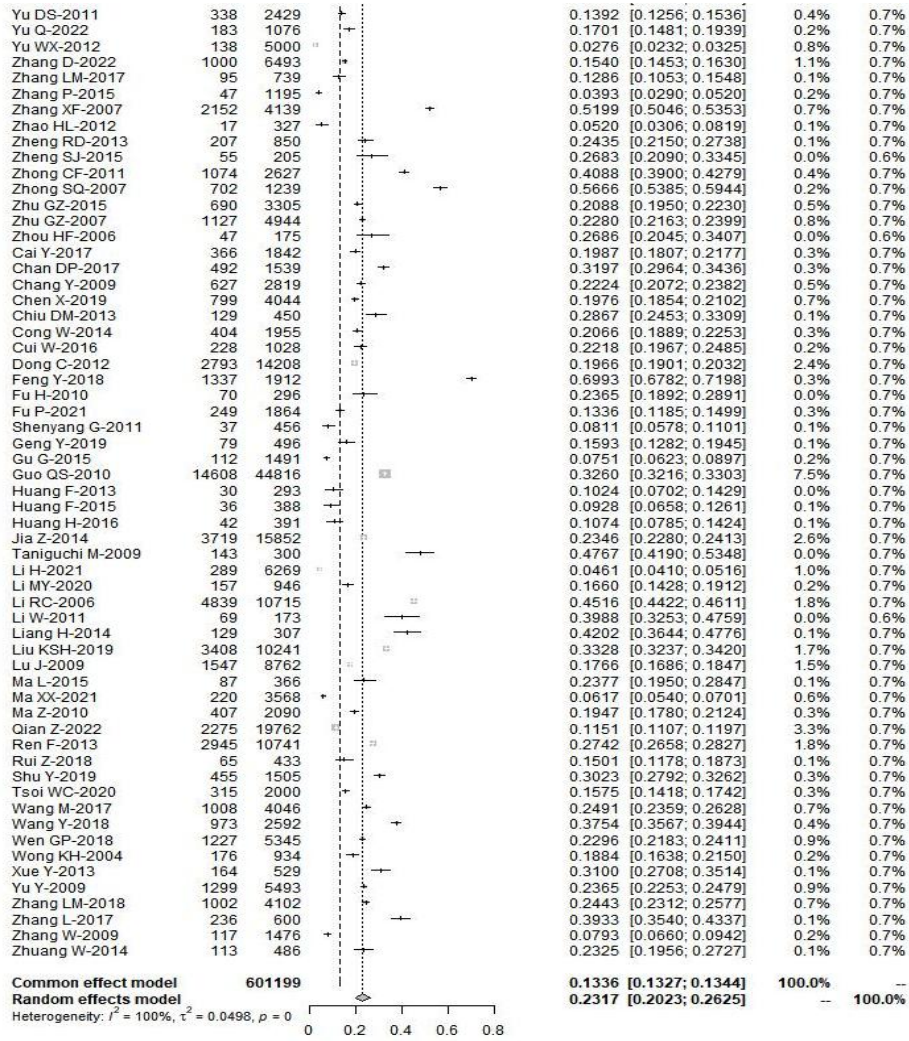

Figure S1. Forest plot of pooled anti-HEV IgG seroprevalence in China

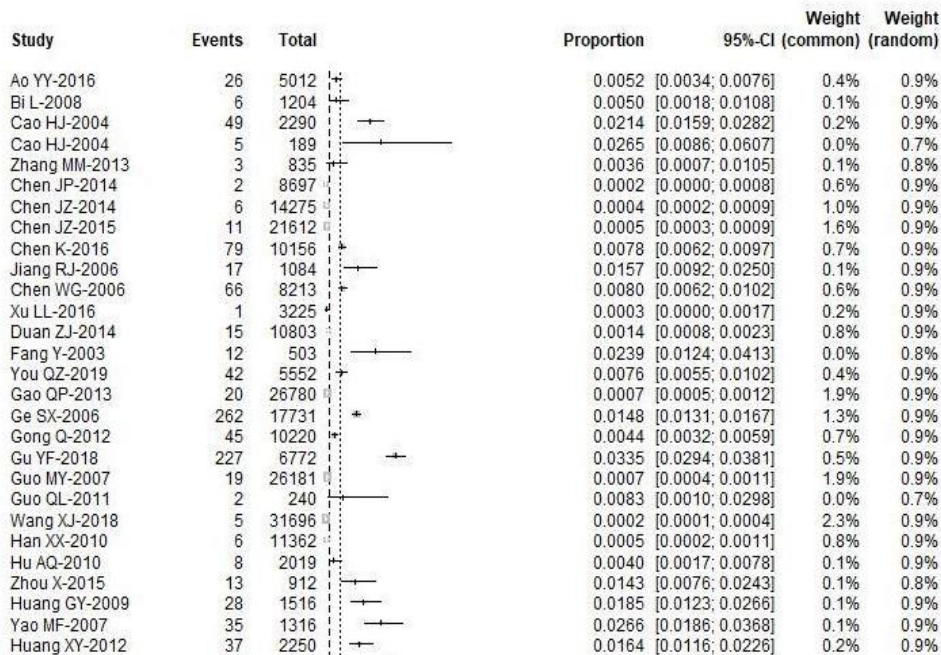

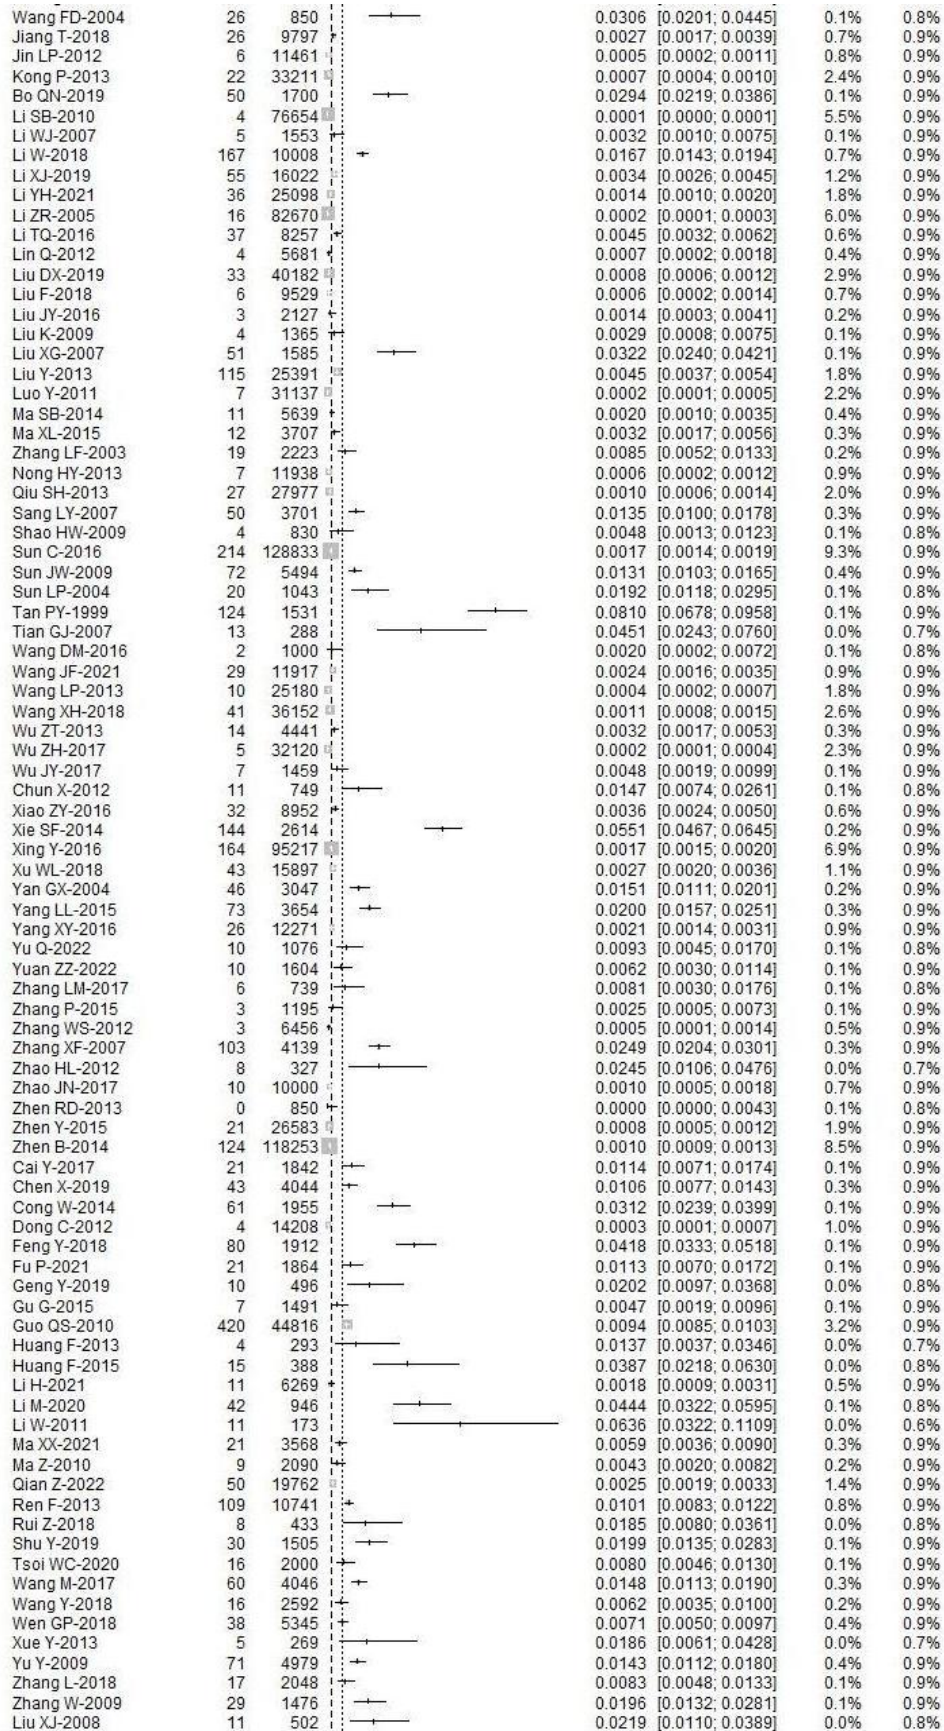

Common effect model  
Random effects model

1388072

0.0017 [0.0016; 0.0017]  
0.0073 [0.0055; 0.0093]

100.0% --  
-- 100.0%

Heterogeneity:  $I^2 = 98\%$ ,  $\tau^2 = 0.0033$ ,  $p = 0$

0 0.02 0.04 0.06 0.08 0.1

Figure S2. Forest plot of pooled anti-HEV IgM seroprevalence in China

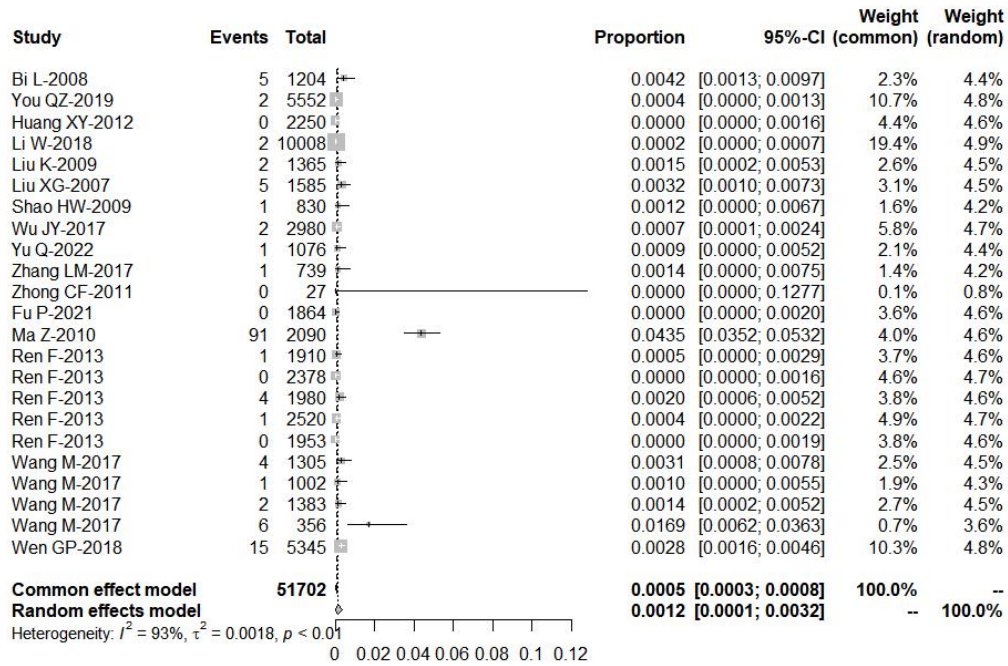

Figure S3. Forest plot of pooled HEV anti-HEV Ag seroprevalence in China

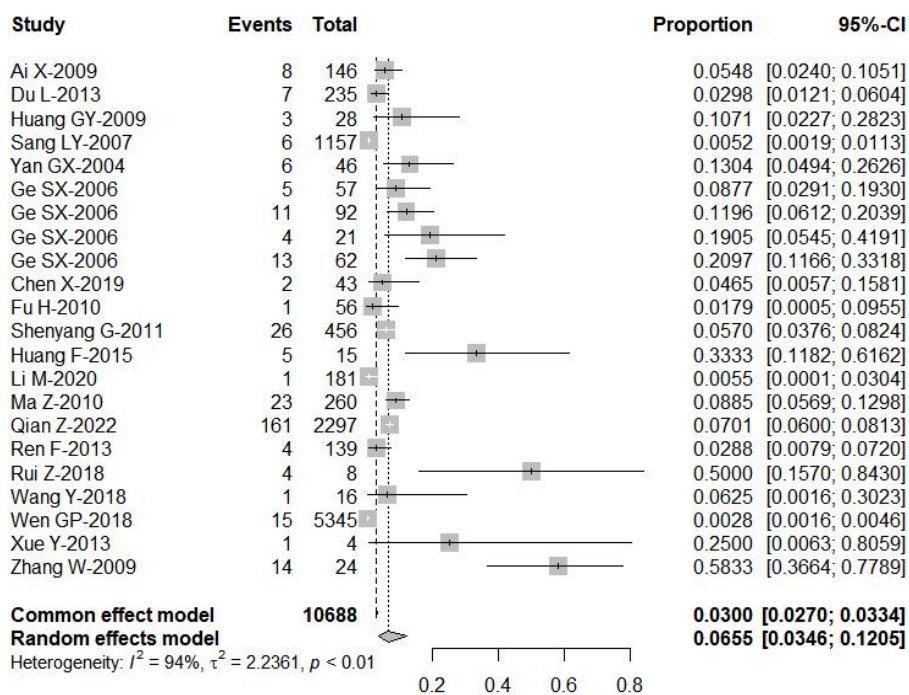

Figure S4. Forest plot of pooled HEV RNA detection rate in China



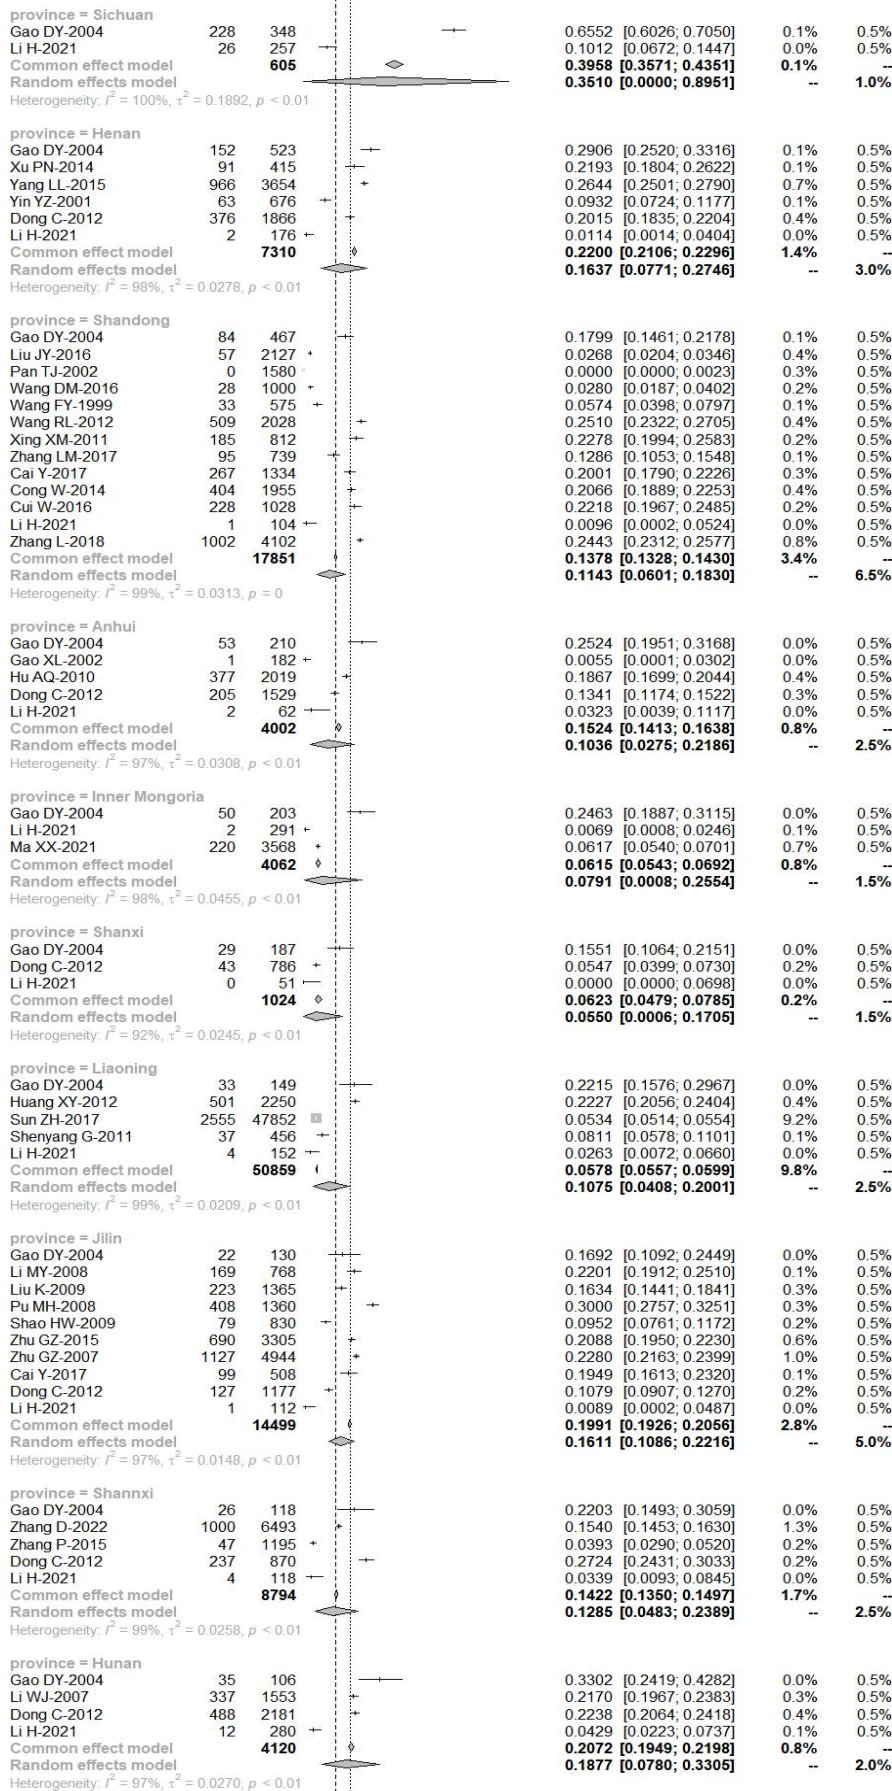

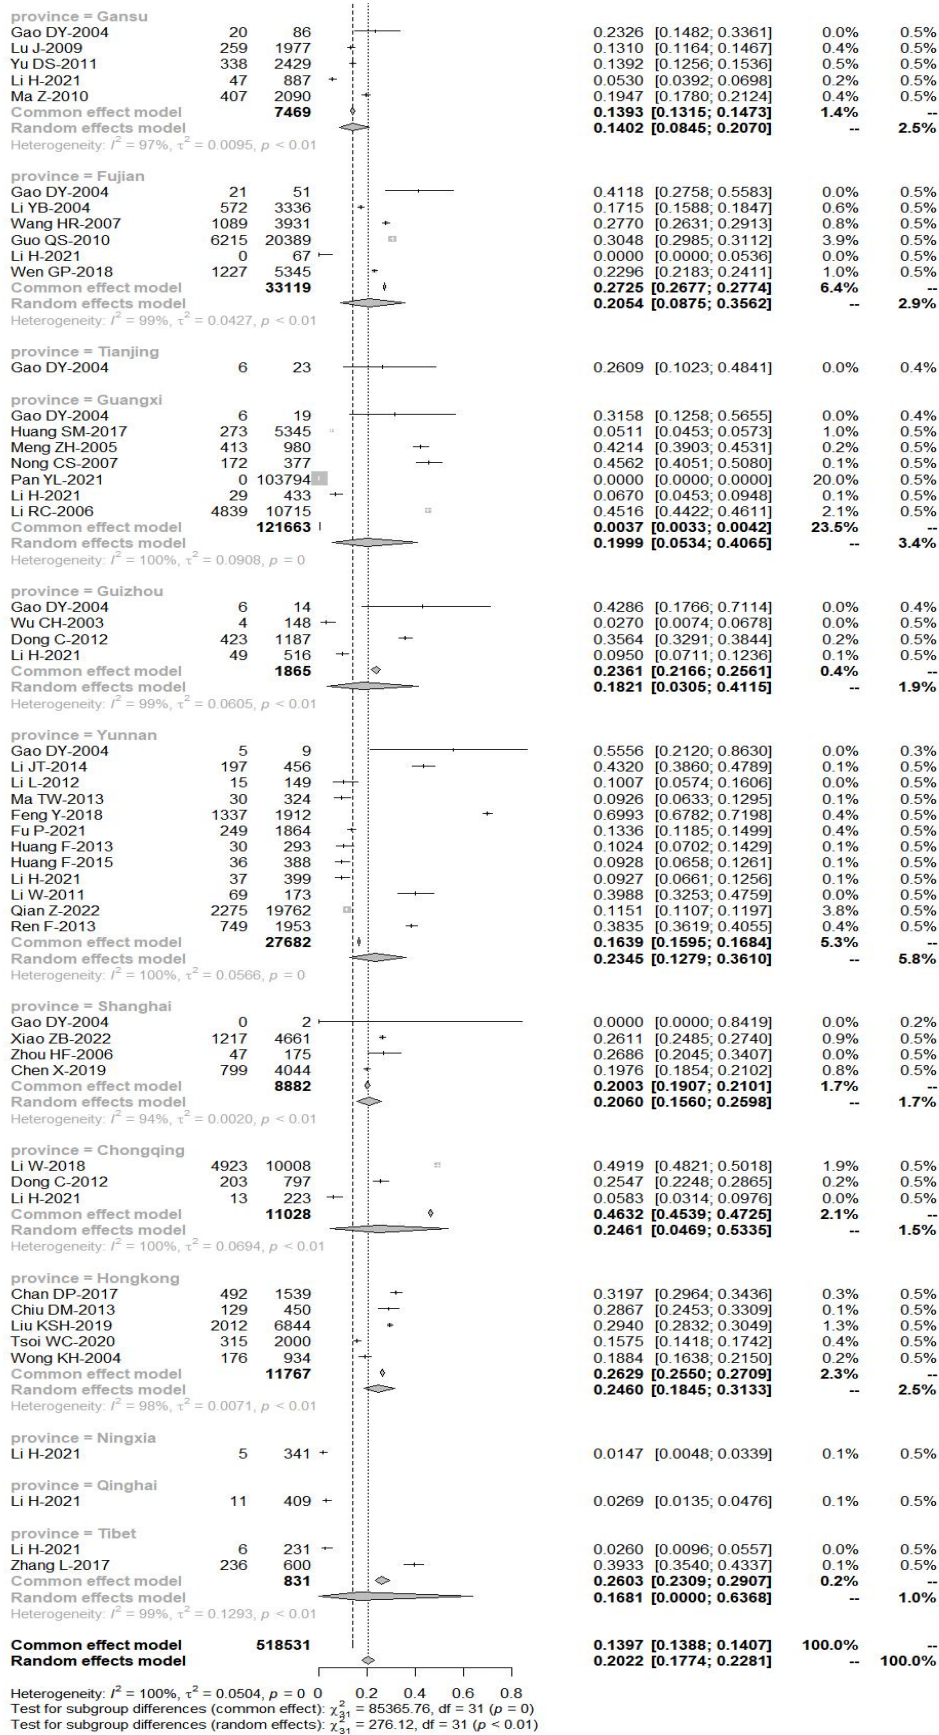

Figure S5. Forest plot of pooled anti-HEV IgG seroprevalence of all populations among different provinces



| Study                                                        | Events | Total         | Proportion    | 95%-CI                  | Weight (common) | Weight (random) |
|--------------------------------------------------------------|--------|---------------|---------------|-------------------------|-----------------|-----------------|
| province = Guangdong                                         |        |               |               |                         |                 |                 |
| Ao YY-2016                                                   | 26     | 5012          | 0.0052        | [0.0034; 0.0076]        | 0.4%            | 0.9%            |
| Zhang MM-2013                                                | 3      | 835           | 0.0036        | [0.0007; 0.0105]        | 0.1%            | 0.9%            |
| Fang Y-2003                                                  | 12     | 503           | 0.0239        | [0.0124; 0.0413]        | 0.0%            | 0.8%            |
| You QZ-2019                                                  | 42     | 5552          | 0.0076        | [0.0055; 0.0102]        | 0.4%            | 0.9%            |
| Tan PY-1999                                                  | 124    | 1531          | 0.0810        | [0.0678; 0.0958]        | 0.1%            | 0.9%            |
| Ren F-2013                                                   | 16     | 2520          | 0.0063        | [0.0036; 0.0103]        | 0.2%            | 0.9%            |
| Common effect model                                          |        | <b>16953</b>  | <b>0.0100</b> | <b>[0.0085; 0.0117]</b> | <b>1.2%</b>     | --              |
| Random effects model                                         |        |               | <b>0.0152</b> | <b>[0.0027; 0.0371]</b> | --              | <b>5.3%</b>     |
| Heterogeneity: $I^2 = 98\%$ , $\tau^2 = 0.0074$ , $p < 0.01$ |        |               |               |                         |                 |                 |
| province = Heilongjiang                                      |        |               |               |                         |                 |                 |
| Bi L-2008                                                    | 6      | 1204          | 0.0050        | [0.0018; 0.0108]        | 0.1%            | 0.9%            |
| province = Zhejiang                                          |        |               |               |                         |                 |                 |
| Cao HJ-2004                                                  | 5      | 189           | 0.0265        | [0.0086; 0.0607]        | 0.0%            | 0.7%            |
| Ge SX-2006                                                   | 113    | 5202          | 0.0217        | [0.0179; 0.0261]        | 0.4%            | 0.9%            |
| Guo MY-2007                                                  | 19     | 26181         | 0.0007        | [0.0004; 0.0011]        | 1.9%            | 0.9%            |
| Huang GY-2009                                                | 28     | 1516          | 0.0185        | [0.0123; 0.0266]        | 0.1%            | 0.9%            |
| Wang FD-2004                                                 | 26     | 850           | 0.0306        | [0.0201; 0.0445]        | 0.1%            | 0.9%            |
| Sang LY-2007                                                 | 50     | 3701          | 0.0135        | [0.0100; 0.0178]        | 0.3%            | 0.9%            |
| Yan GX-2004                                                  | 46     | 3047          | 0.0151        | [0.0111; 0.0201]        | 0.2%            | 0.9%            |
| Guo QS-2010                                                  | 142    | 14291         | 0.0099        | [0.0084; 0.0117]        | 1.1%            | 0.9%            |
| Ren F-2013                                                   | 27     | 1980          | 0.0136        | [0.0090; 0.0198]        | 0.1%            | 0.9%            |
| Common effect model                                          |        | <b>56957</b>  | <b>0.0054</b> | <b>[0.0048; 0.0060]</b> | <b>4.2%</b>     | --              |
| Random effects model                                         |        |               | <b>0.0142</b> | <b>[0.0080; 0.0220]</b> | --              | <b>7.9%</b>     |
| Heterogeneity: $I^2 = 98\%$ , $\tau^2 = 0.0018$ , $p < 0.01$ |        |               |               |                         |                 |                 |
| province = Yunnan                                            |        |               |               |                         |                 |                 |
| Chen JP-2014                                                 | 2      | 8697          | 0.0002        | [0.0000; 0.0008]        | 0.6%            | 0.9%            |
| Duan ZJ-2014                                                 | 15     | 10803         | 0.0014        | [0.0008; 0.0023]        | 0.8%            | 0.9%            |
| Li YH-2021                                                   | 36     | 25098         | 0.0014        | [0.0010; 0.0020]        | 1.9%            | 0.9%            |
| Ma SB-2014                                                   | 11     | 5639          | 0.0020        | [0.0010; 0.0035]        | 0.4%            | 0.9%            |
| Wang JF-2021                                                 | 29     | 11917         | 0.0024        | [0.0016; 0.0035]        | 0.9%            | 0.9%            |
| Xu WL-2018                                                   | 43     | 15897         | 0.0027        | [0.0020; 0.0036]        | 1.2%            | 0.9%            |
| Zheng Y-2015                                                 | 21     | 26583         | 0.0008        | [0.0005; 0.0012]        | 2.0%            | 0.9%            |
| Feng Y-2018                                                  | 80     | 1912          | 0.0418        | [0.0333; 0.0518]        | 0.1%            | 0.9%            |
| Fu P-2021                                                    | 21     | 1864          | 0.0113        | [0.0070; 0.0172]        | 0.1%            | 0.9%            |
| Huang F-2013                                                 | 4      | 293           | 0.0137        | [0.0037; 0.0346]        | 0.0%            | 0.7%            |
| Huang F-2015                                                 | 15     | 388           | 0.0387        | [0.0218; 0.0630]        | 0.0%            | 0.8%            |
| Li W-2011                                                    | 11     | 173           | 0.0636        | [0.0322; 0.1109]        | 0.0%            | 0.6%            |
| Qian Z-2022                                                  | 50     | 19762         | 0.0025        | [0.0019; 0.0033]        | 1.5%            | 0.9%            |
| Ren F-2013                                                   | 22     | 1953          | 0.0113        | [0.0071; 0.0170]        | 0.1%            | 0.9%            |
| Common effect model                                          |        | <b>130979</b> | <b>0.0016</b> | <b>[0.0013; 0.0018]</b> | <b>9.8%</b>     | --              |
| Random effects model                                         |        |               | <b>0.0077</b> | <b>[0.0023; 0.0159]</b> | --              | <b>12.3%</b>    |
| Heterogeneity: $I^2 = 97\%$ , $\tau^2 = 0.0050$ , $p < 0.01$ |        |               |               |                         |                 |                 |
| province = Fujian                                            |        |               |               |                         |                 |                 |
| Chen JZ-2014                                                 | 6      | 14275         | 0.0004        | [0.0002; 0.0009]        | 1.1%            | 0.9%            |
| Chen JZ-2014                                                 | 11     | 21612         | 0.0005        | [0.0003; 0.0009]        | 1.6%            | 0.9%            |
| Lin Q-2012                                                   | 4      | 5681          | 0.0007        | [0.0002; 0.0018]        | 0.4%            | 0.9%            |
| Qiu SH-2013                                                  | 27     | 27977         | 0.0010        | [0.0006; 0.0014]        | 2.1%            | 0.9%            |
| Zhang WS-2012                                                | 3      | 6456          | 0.0005        | [0.0001; 0.0014]        | 0.5%            | 0.9%            |
| Guo QS-2010                                                  | 186    | 20389         | 0.0091        | [0.0079; 0.0105]        | 1.5%            | 0.9%            |
| Wen GP-2018                                                  | 38     | 5345          | 0.0071        | [0.0050; 0.0097]        | 0.4%            | 0.9%            |
| Common effect model                                          |        | <b>101735</b> | <b>0.0018</b> | <b>[0.0016; 0.0021]</b> | <b>7.6%</b>     | --              |
| Random effects model                                         |        |               | <b>0.0019</b> | <b>[0.0004; 0.0045]</b> | --              | <b>6.5%</b>     |
| Heterogeneity: $I^2 = 98\%$ , $\tau^2 = 0.0010$ , $p < 0.01$ |        |               |               |                         |                 |                 |
| province = Hubei                                             |        |               |               |                         |                 |                 |
| Chen K-2106                                                  | 79     | 10156         | 0.0078        | [0.0062; 0.0097]        | 0.8%            | 0.9%            |
| Cheng WG-2006                                                | 66     | 8213          | 0.0080        | [0.0062; 0.0102]        | 0.6%            | 0.9%            |
| Gao YP-2013                                                  | 20     | 26780         | 0.0007        | [0.0005; 0.0012]        | 2.0%            | 0.9%            |
| Ge SX-2006                                                   | 92     | 10139         | 0.0091        | [0.0073; 0.0111]        | 0.8%            | 0.9%            |
| Liu XG-2007                                                  | 51     | 1585          | 0.0322        | [0.0240; 0.0421]        | 0.1%            | 0.9%            |
| Tian GJ-2007                                                 | 13     | 288           | 0.0451        | [0.0243; 0.0760]        | 0.0%            | 0.7%            |
| Xie SF-2014                                                  | 144    | 2614          | 0.0551        | [0.0467; 0.0645]        | 0.2%            | 0.9%            |
| Yu Q-2022                                                    | 10     | 1076          | 0.0093        | [0.0045; 0.0170]        | 0.1%            | 0.9%            |
| Guo QS-2010                                                  | 92     | 10136         | 0.0091        | [0.0073; 0.0111]        | 0.8%            | 0.9%            |
| Shu Y-2019                                                   | 30     | 1505          | 0.0199        | [0.0135; 0.0283]        | 0.1%            | 0.9%            |
| Common effect model                                          |        | <b>72492</b>  | <b>0.0057</b> | <b>[0.0051; 0.0062]</b> | <b>5.4%</b>     | --              |
| Random effects model                                         |        |               | <b>0.0154</b> | <b>[0.0070; 0.0270]</b> | --              | <b>8.9%</b>     |
| Heterogeneity: $I^2 = 99\%$ , $\tau^2 = 0.0041$ , $p < 0.01$ |        |               |               |                         |                 |                 |
| province = Jiangsu                                           |        |               |               |                         |                 |                 |
| Chen YZ-2006                                                 | 17     | 1084          | 0.0157        | [0.0092; 0.0250]        | 0.1%            | 0.9%            |
| Ge SX-2006                                                   | 57     | 2390          | 0.0238        | [0.0181; 0.0308]        | 0.2%            | 0.9%            |
| Gu YF-2018                                                   | 227    | 6772          | 0.0335        | [0.0294; 0.0381]        | 0.5%            | 0.9%            |
| Zhou X-2015                                                  | 13     | 912           | 0.0143        | [0.0076; 0.0243]        | 0.1%            | 0.9%            |
| Yao MF-2007                                                  | 35     | 1316          | 0.0266        | [0.0186; 0.0368]        | 0.1%            | 0.9%            |
| Zhang LF-2003                                                | 19     | 2223          | 0.0085        | [0.0052; 0.0133]        | 0.2%            | 0.9%            |
| Zhang XF-2007                                                | 103    | 4139          | 0.0249        | [0.0204; 0.0301]        | 0.3%            | 0.9%            |
| Zheng Y-2014                                                 | 124    | 118253        | 0.0010        | [0.0009; 0.0013]        | 8.8%            | 0.9%            |
| Gu G-2015                                                    | 7      | 1491          | 0.0047        | [0.0019; 0.0096]        | 0.1%            | 0.9%            |
| Rui Z-2018                                                   | 8      | 433           | 0.0185        | [0.0080; 0.0361]        | 0.0%            | 0.8%            |
| Wang Y-2018                                                  | 16     | 2592          | 0.0062        | [0.0035; 0.0100]        | 0.2%            | 0.9%            |
| Xue Y-2013                                                   | 5      | 269           | 0.0186        | [0.0061; 0.0428]        | 0.0%            | 0.7%            |
| Common effect model                                          |        | <b>141874</b> | <b>0.0021</b> | <b>[0.0019; 0.0024]</b> | <b>10.6%</b>    | --              |
| Random effects model                                         |        |               | <b>0.0143</b> | <b>[0.0085; 0.0215]</b> | --              | <b>10.5%</b>    |
| Heterogeneity: $I^2 = 99\%$ , $\tau^2 = 0.0021$ , $p < 0.01$ |        |               |               |                         |                 |                 |
| province = Shanxi                                            |        |               |               |                         |                 |                 |
| Gong Q-2012                                                  | 45     | 10220         | 0.0044        | [0.0032; 0.0059]        | 0.8%            | 0.9%            |
| Li ZR-2005                                                   | 16     | 82670         | 0.0002        | [0.0001; 0.0003]        | 6.2%            | 0.9%            |
| Li TQ-2016                                                   | 37     | 8257          | 0.0045        | [0.0032; 0.0062]        | 0.6%            | 0.9%            |
| Sun LP-2004                                                  | 20     | 1043          | 0.0192        | [0.0118; 0.0295]        | 0.1%            | 0.9%            |
| Common effect model                                          |        | <b>102190</b> | <b>0.0005</b> | <b>[0.0003; 0.0006]</b> | <b>7.6%</b>     | --              |
| Random effects model                                         |        |               | <b>0.0048</b> | <b>[0.0003; 0.0143]</b> | --              | <b>3.6%</b>     |
| Heterogeneity: $I^2 = 99\%$ , $\tau^2 = 0.0025$ , $p < 0.01$ |        |               |               |                         |                 |                 |
| province = Inner Mongolia                                    |        |               |               |                         |                 |                 |
| Wang XJ-2018                                                 | 5      | 31696         | 0.0002        | [0.0001; 0.0004]        | 2.4%            | 0.9%            |
| Ma XX-2021                                                   | 21     | 3568          | 0.0059        | [0.0036; 0.0090]        | 0.3%            | 0.9%            |
| Common effect model                                          |        | <b>35264</b>  | <b>0.0003</b> | <b>[0.0001; 0.0005]</b> | <b>2.6%</b>     | --              |
| Random effects model                                         |        |               | <b>0.0019</b> | <b>[0.0000; 0.0116]</b> | --              | <b>1.8%</b>     |
| Heterogeneity: $I^2 = 98\%$ , $\tau^2 = 0.0020$ , $p < 0.01$ |        |               |               |                         |                 |                 |

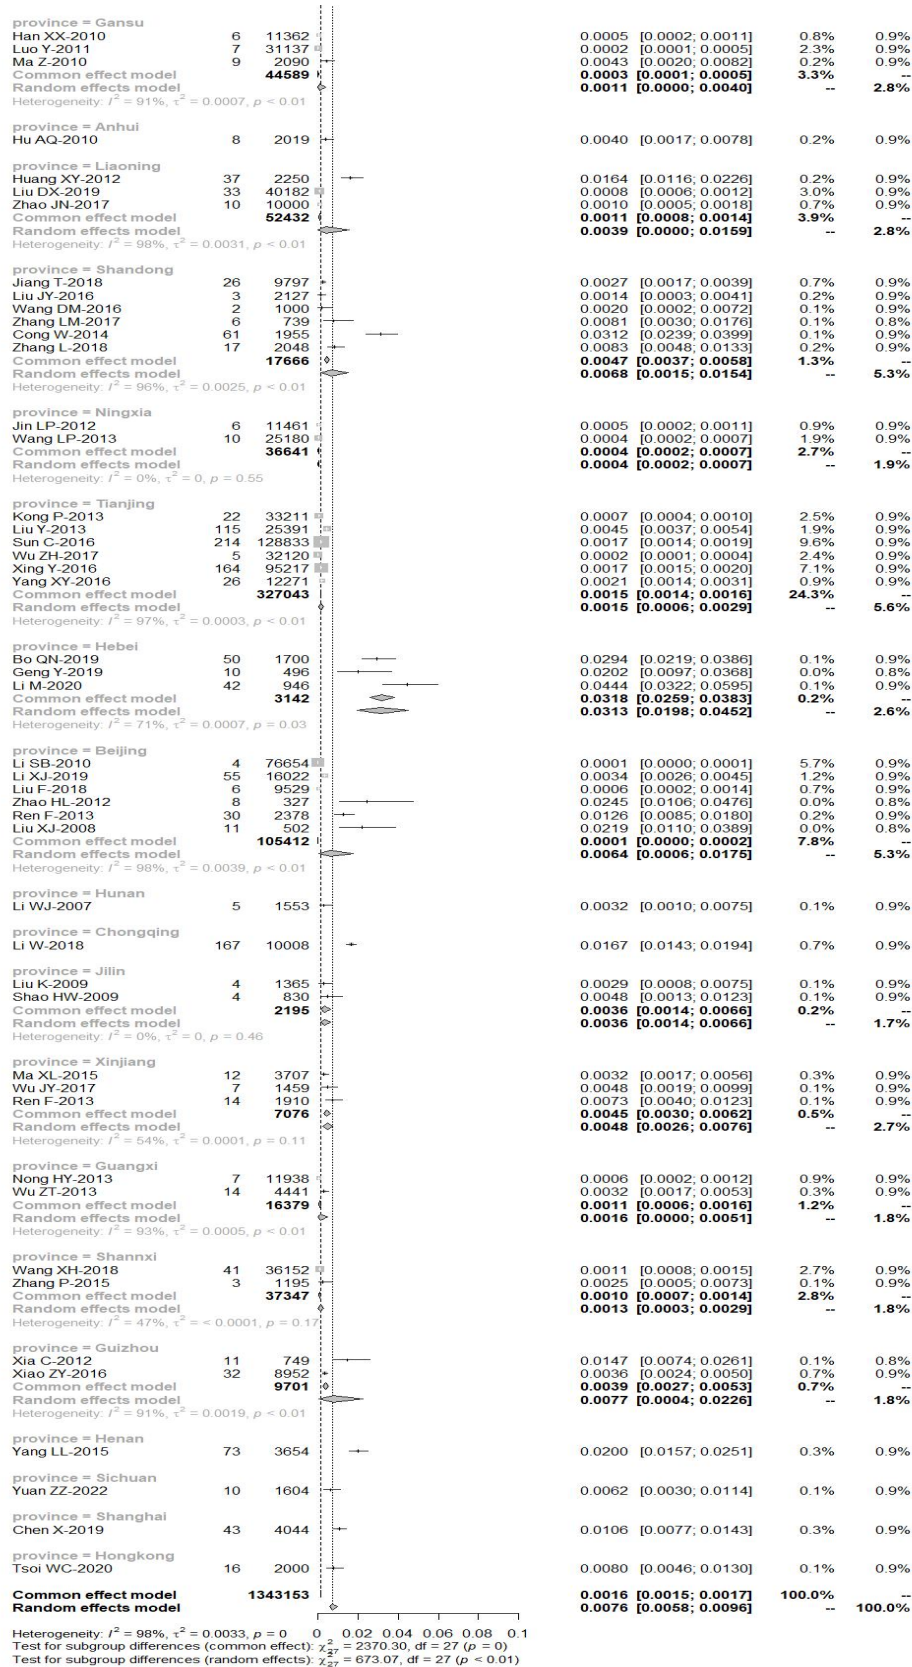

Figure S6. Forest plot of pooled anti-HEV IgM seroprevalence of all populations among different provinces

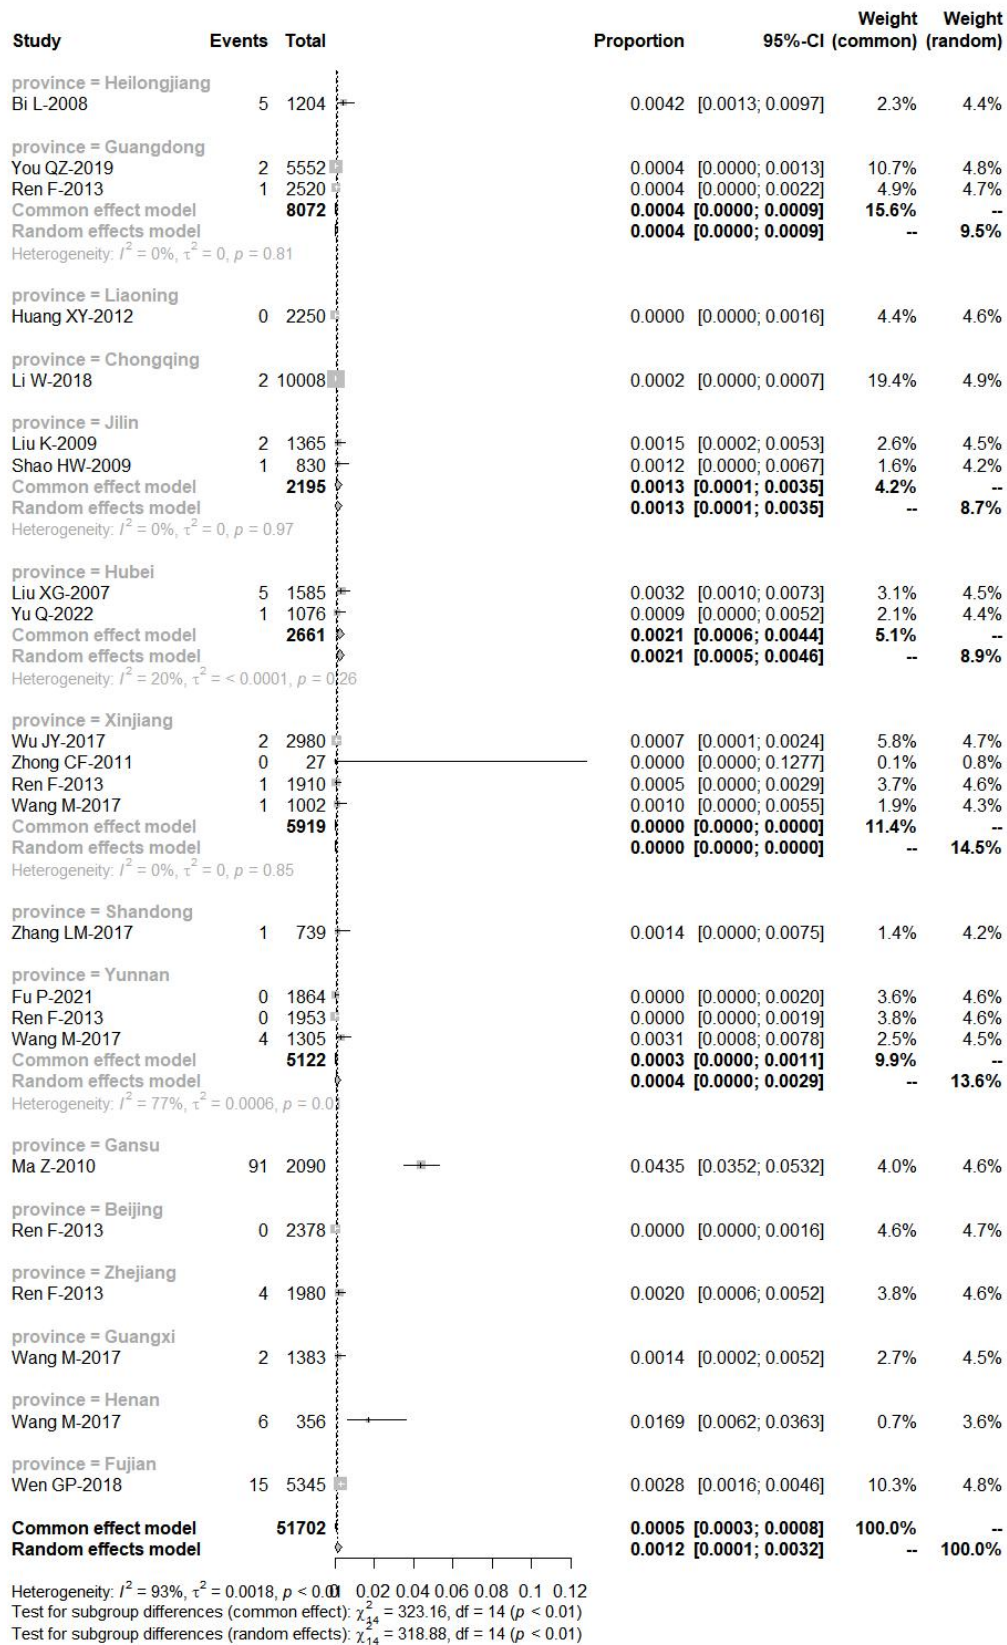

Figure S7. Forest plot of pooled anti-HEV Ag seroprevalence of all populations among different provinces

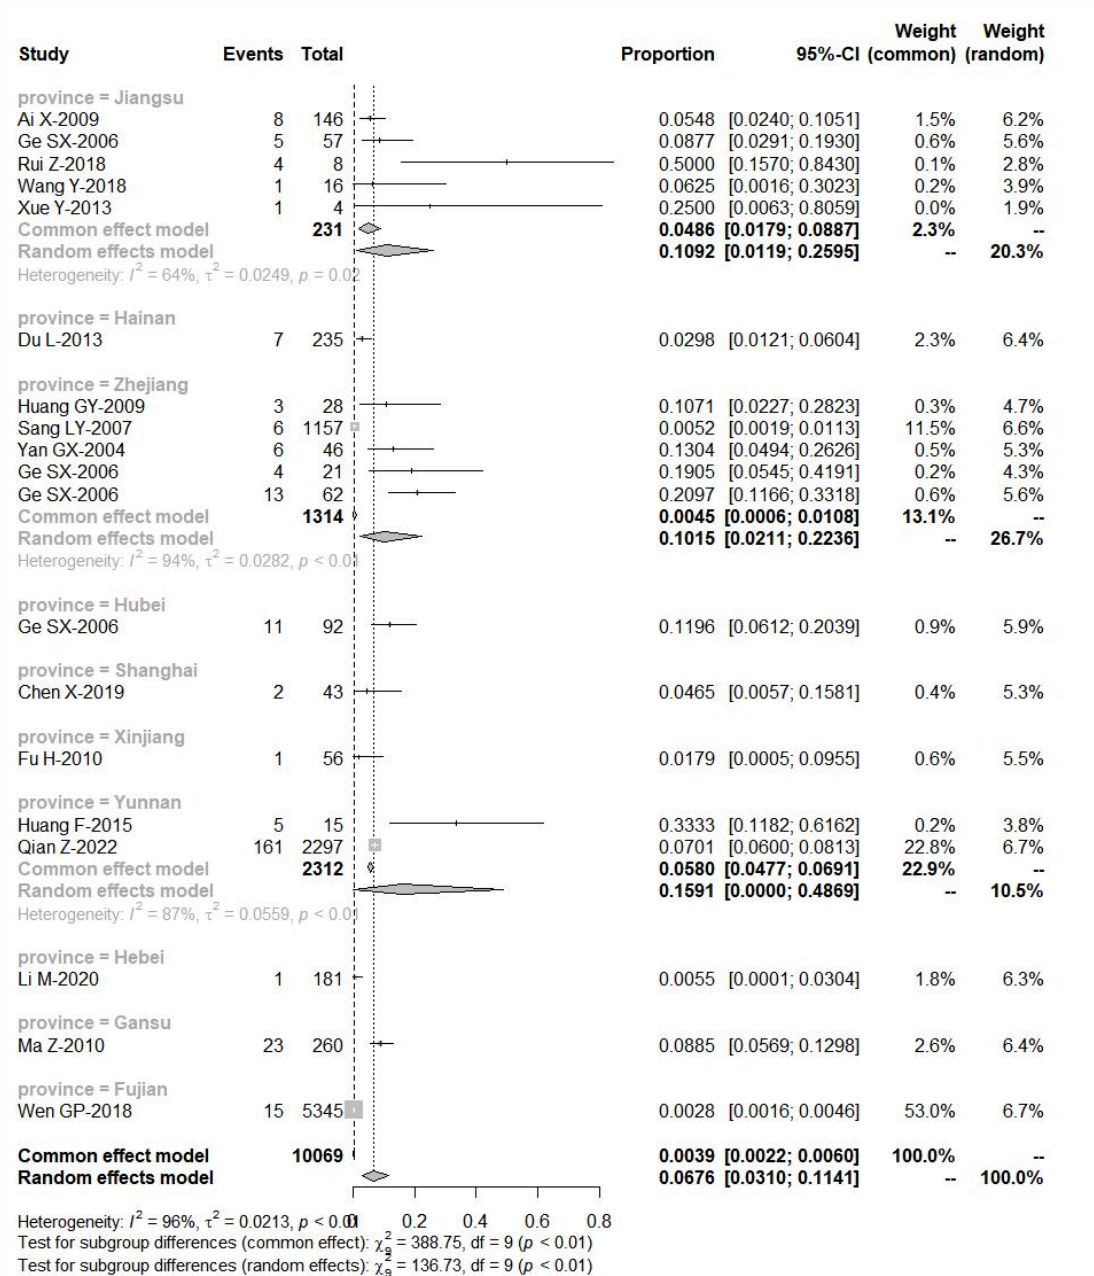

Figure S8. Forest plot of pooled HEV RNA detection rate of all populations in different provinces



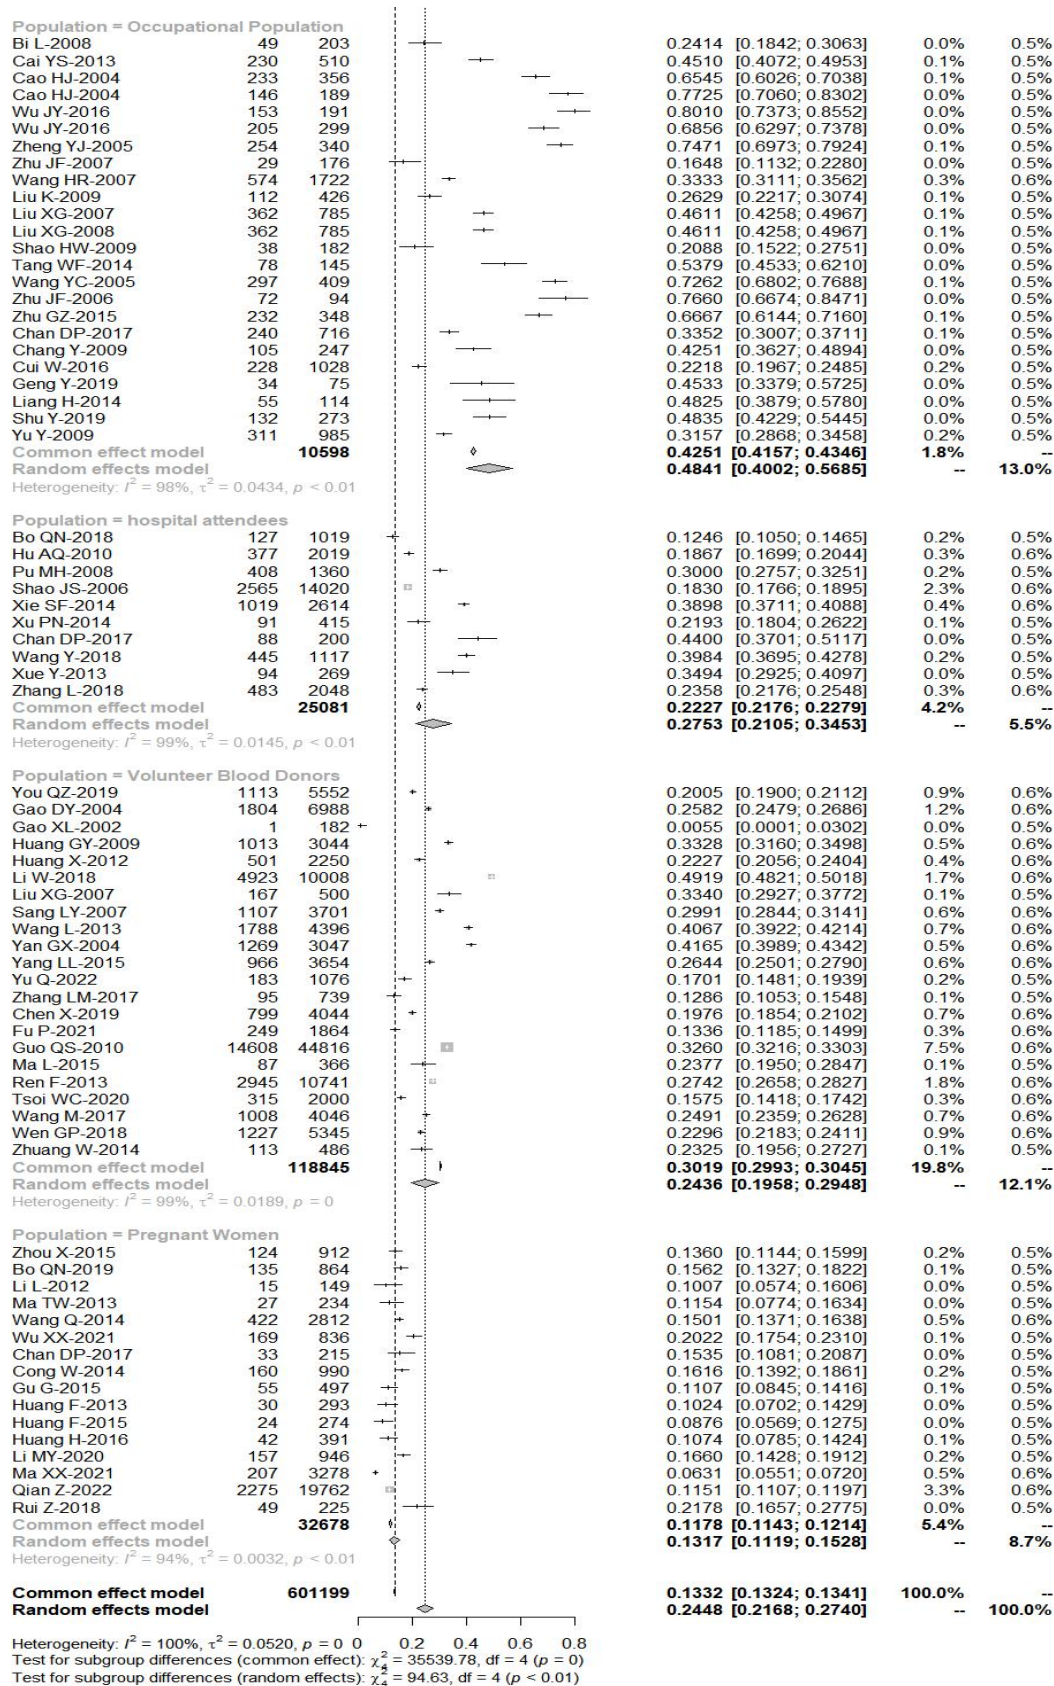

Figure S9. Forest plot of pooled anti-HEV IgG seroprevalence among different population

| Study                               | Events | Total          | Proportion    | 95%-CI (common)         | Weight (random) | Weight (common) |
|-------------------------------------|--------|----------------|---------------|-------------------------|-----------------|-----------------|
| population = The General Population |        |                |               |                         |                 |                 |
| Ao YY-2016                          | 26     | 5012           | 0.0052        | [0.0034; 0.0076]        | 0.4%            | 0.8%            |
| Bi L-2008                           | 5      | 1001           | 0.0050        | [0.0016; 0.0116]        | 0.1%            | 0.8%            |
| Cao HJ-2004                         | 43     | 1934           | 0.0222        | [0.0161; 0.0298]        | 0.1%            | 0.8%            |
| Zhang MM-2013                       | 3      | 835            | 0.0036        | [0.0007; 0.0105]        | 0.1%            | 0.7%            |
| Chen JP-2014                        | 2      | 8697           | 0.0002        | [0.0000; 0.0008]        | 0.7%            | 0.8%            |
| Chen JZ-2014                        | 6      | 14275          | 0.0004        | [0.0002; 0.0009]        | 1.1%            | 0.8%            |
| Chen JZ-2014                        | 11     | 21612          | 0.0005        | [0.0003; 0.0009]        | 1.7%            | 0.8%            |
| Chen K-2106                         | 79     | 10156          | 0.0078        | [0.0062; 0.0097]        | 0.8%            | 0.8%            |
| Jiang RJ-2006                       | 17     | 1084           | 0.0157        | [0.0092; 0.0250]        | 0.1%            | 0.8%            |
| Xu LL-2016                          | 1      | 3225           | 0.0003        | [0.0000; 0.0017]        | 0.2%            | 0.8%            |
| Duan ZJ-2014                        | 15     | 10803          | 0.0014        | [0.0008; 0.0023]        | 0.8%            | 0.8%            |
| Gao YP-2013                         | 20     | 26780          | 0.0007        | [0.0005; 0.0012]        | 2.1%            | 0.8%            |
| Ge SX-2006                          | 108    | 4110           | 0.0263        | [0.0216; 0.0316]        | 0.3%            | 0.8%            |
| Gong Q-2012                         | 45     | 10220          | 0.0044        | [0.0032; 0.0059]        | 0.8%            | 0.8%            |
| Guo QL-2011                         | 2      | 240            | 0.0083        | [0.0010; 0.0298]        | 0.0%            | 0.6%            |
| Wang XJ-2018                        | 5      | 31696          | 0.0002        | [0.0001; 0.0004]        | 2.4%            | 0.8%            |
| Han XX-2010                         | 6      | 11362          | 0.0005        | [0.0002; 0.0011]        | 0.9%            | 0.8%            |
| Yao MF-2007                         | 35     | 1316           | 0.0266        | [0.0186; 0.0368]        | 0.1%            | 0.8%            |
| Wang FD-2004                        | 26     | 850            | 0.0306        | [0.0201; 0.0445]        | 0.1%            | 0.7%            |
| Jiang T-2018                        | 26     | 9797           | 0.0027        | [0.0017; 0.0039]        | 0.8%            | 0.8%            |
| Jin LP-2012                         | 6      | 11461          | 0.0005        | [0.0002; 0.0011]        | 0.9%            | 0.8%            |
| Kong P-2013                         | 22     | 33211          | 0.0007        | [0.0004; 0.0010]        | 2.5%            | 0.8%            |
| Bo QN-2019                          | 17     | 836            | 0.0203        | [0.0119; 0.0324]        | 0.1%            | 0.7%            |
| Li SB-2010                          | 4      | 76654          | 0.0001        | [0.0000; 0.0001]        | 5.9%            | 0.8%            |
| Li WJ-2007                          | 5      | 1553           | 0.0032        | [0.0010; 0.0075]        | 0.1%            | 0.8%            |
| Li XJ-2019                          | 55     | 18022          | 0.0034        | [0.0026; 0.0045]        | 1.2%            | 0.8%            |
| Li YH-2021                          | 36     | 25098          | 0.0014        | [0.0010; 0.0020]        | 1.9%            | 0.8%            |
| Li TQ-2016                          | 37     | 8257           | 0.0045        | [0.0032; 0.0062]        | 0.6%            | 0.8%            |
| Lin Q-2012                          | 4      | 5681           | 0.0007        | [0.0002; 0.0018]        | 0.4%            | 0.8%            |
| Liu DX-2019                         | 33     | 40182          | 0.0008        | [0.0006; 0.0012]        | 3.1%            | 0.8%            |
| Liu F-2018                          | 6      | 9529           | 0.0006        | [0.0002; 0.0014]        | 0.7%            | 0.8%            |
| Liu JY-2016                         | 3      | 2127           | 0.0014        | [0.0003; 0.0041]        | 0.2%            | 0.8%            |
| Liu K-2009                          | 1      | 939            | 0.0011        | [0.0000; 0.0059]        | 0.1%            | 0.8%            |
| Liu XG-2007                         | 5      | 300            | 0.0167        | [0.0054; 0.0385]        | 0.0%            | 0.7%            |
| Liu Y-2013                          | 115    | 25391          | 0.0045        | [0.0037; 0.0054]        | 1.9%            | 0.8%            |
| Luo Y-2011                          | 7      | 31137          | 0.0002        | [0.0001; 0.0005]        | 2.4%            | 0.8%            |
| Ma SB-2014                          | 11     | 5639           | 0.0020        | [0.0010; 0.0035]        | 0.4%            | 0.8%            |
| Ma XL-2015                          | 12     | 3707           | 0.0032        | [0.0017; 0.0056]        | 0.3%            | 0.8%            |
| Zhang LF-2003                       | 19     | 2223           | 0.0085        | [0.0052; 0.0133]        | 0.2%            | 0.8%            |
| Nong HY-2013                        | 7      | 11938          | 0.0006        | [0.0002; 0.0012]        | 0.9%            | 0.8%            |
| Qiu SH-2013                         | 27     | 27977          | 0.0010        | [0.0006; 0.0014]        | 2.1%            | 0.8%            |
| Shao HW-2009                        | 1      | 648            | 0.0015        | [0.0000; 0.0086]        | 0.0%            | 0.7%            |
| Sun C-2016                          | 214    | 128833         | 0.0017        | [0.0014; 0.0019]        | 9.9%            | 0.8%            |
| Sun JW-2009                         | 65     | 3994           | 0.0163        | [0.0126; 0.0207]        | 0.3%            | 0.8%            |
| Sun LP-2004                         | 20     | 1043           | 0.0192        | [0.0118; 0.0295]        | 0.1%            | 0.8%            |
| Tian GJ-2007                        | 13     | 288            | 0.0451        | [0.0243; 0.0760]        | 0.0%            | 0.6%            |
| Wang DM-2016                        | 2      | 1000           | 0.0020        | [0.0002; 0.0072]        | 0.1%            | 0.8%            |
| Wang JF-2021                        | 29     | 11917          | 0.0024        | [0.0016; 0.0035]        | 0.9%            | 0.8%            |
| Wang JP-2013                        | 10     | 25180          | 0.0004        | [0.0002; 0.0007]        | 1.9%            | 0.8%            |
| Wang XH-2018                        | 41     | 36152          | 0.0011        | [0.0008; 0.0015]        | 2.8%            | 0.8%            |
| Wu ZT-2013                          | 14     | 4441           | 0.0032        | [0.0017; 0.0053]        | 0.3%            | 0.8%            |
| Wu ZH-2017                          | 55     | 32120          | 0.0017        | [0.0013; 0.0022]        | 2.5%            | 0.8%            |
| Wu JY-2017                          | 7      | 1459           | 0.0048        | [0.0019; 0.0099]        | 0.1%            | 0.8%            |
| Xia C-2012                          | 11     | 749            | 0.0147        | [0.0074; 0.0261]        | 0.1%            | 0.7%            |
| Xiao ZY-2016                        | 32     | 8952           | 0.0036        | [0.0024; 0.0050]        | 0.7%            | 0.8%            |
| Xing Y-2016                         | 164    | 95217          | 0.0017        | [0.0015; 0.0020]        | 7.3%            | 0.8%            |
| Xu WL-2018                          | 21     | 15897          | 0.0013        | [0.0008; 0.0020]        | 1.2%            | 0.8%            |
| Yang XY-2016                        | 26     | 12271          | 0.0021        | [0.0014; 0.0031]        | 0.9%            | 0.8%            |
| Yuan ZZ-2022                        | 10     | 1604           | 0.0062        | [0.0030; 0.0114]        | 0.1%            | 0.8%            |
| Zhang P-2015                        | 3      | 1195           | 0.0025        | [0.0005; 0.0073]        | 0.1%            | 0.8%            |
| Zhang WS-2012                       | 3      | 6456           | 0.0005        | [0.0001; 0.0014]        | 0.5%            | 0.8%            |
| Zhang XF-2007                       | 103    | 4139           | 0.0249        | [0.0204; 0.0301]        | 0.3%            | 0.8%            |
| Zhao HL-2012                        | 8      | 327            | 0.0245        | [0.0106; 0.0476]        | 0.0%            | 0.7%            |
| Zhao JN-2017                        | 10     | 10000          | 0.0010        | [0.0005; 0.0018]        | 0.8%            | 0.8%            |
| Zheng RD-2013                       | 0      | 850            | 0.0000        | [0.0000; 0.0043]        | 0.1%            | 0.7%            |
| Zheng Y-2015                        | 21     | 26583          | 0.0008        | [0.0005; 0.0012]        | 2.0%            | 0.8%            |
| Zheng Y-2014                        | 124    | 118253         | 0.0010        | [0.0009; 0.0013]        | 9.1%            | 0.8%            |
| Cai Y-2017                          | 21     | 1842           | 0.0114        | [0.0071; 0.0174]        | 0.1%            | 0.8%            |
| Cong W-2014                         | 35     | 965            | 0.0363        | [0.0254; 0.0501]        | 0.1%            | 0.8%            |
| Dong C-2012                         | 4      | 14208          | 0.0003        | [0.0001; 0.0007]        | 1.1%            | 0.8%            |
| Feng Y-2018                         | 80     | 1912           | 0.0418        | [0.0333; 0.0518]        | 0.1%            | 0.8%            |
| Geng Y-2019                         | 5      | 421            | 0.0119        | [0.0039; 0.0275]        | 0.0%            | 0.7%            |
| Gu G-2015                           | 4      | 994            | 0.0040        | [0.0011; 0.0103]        | 0.1%            | 0.8%            |
| Huang F-2015                        | 5      | 114            | 0.0439        | [0.0144; 0.0994]        | 0.0%            | 0.5%            |
| Li H-2021                           | 11     | 6269           | 0.0018        | [0.0009; 0.0031]        | 0.5%            | 0.8%            |
| Li W-2011                           | 11     | 173            | 0.0636        | [0.0322; 0.1109]        | 0.0%            | 0.6%            |
| Ma XX-2021                          | 0      | 290            | 0.0000        | [0.0000; 0.0126]        | 0.0%            | 0.6%            |
| Ma Z-2010                           | 9      | 2090           | 0.0043        | [0.0020; 0.0082]        | 0.2%            | 0.8%            |
| Rui Z-2018                          | 0      | 208            | 0.0000        | [0.0000; 0.0176]        | 0.0%            | 0.6%            |
| Shu Y-2019                          | 22     | 1232           | 0.0179        | [0.0112; 0.0269]        | 0.1%            | 0.8%            |
| Wang Y-2018                         | 10     | 1475           | 0.0068        | [0.0033; 0.0124]        | 0.1%            | 0.8%            |
| Yu Y-2009                           | 65     | 3994           | 0.0163        | [0.0126; 0.0207]        | 0.3%            | 0.8%            |
| Zhang W-2009                        | 29     | 1476           | 0.0196        | [0.0132; 0.0281]        | 0.1%            | 0.8%            |
| Liu XJ-2008                         | 11     | 502            | 0.0219        | [0.0110; 0.0389]        | 0.0%            | 0.7%            |
| Common effect model                 |        | <b>1102600</b> | <b>0.0010</b> | <b>[0.0010; 0.0011]</b> | <b>84.7%</b>    | --              |
| Random effects model                |        |                | <b>0.0049</b> | <b>[0.0033; 0.0067]</b> | --              | <b>64.6%</b>    |

Heterogeneity:  $I^2 = 97%$ ,  $\tau^2 = 0.0027$ ,  $p = 0$

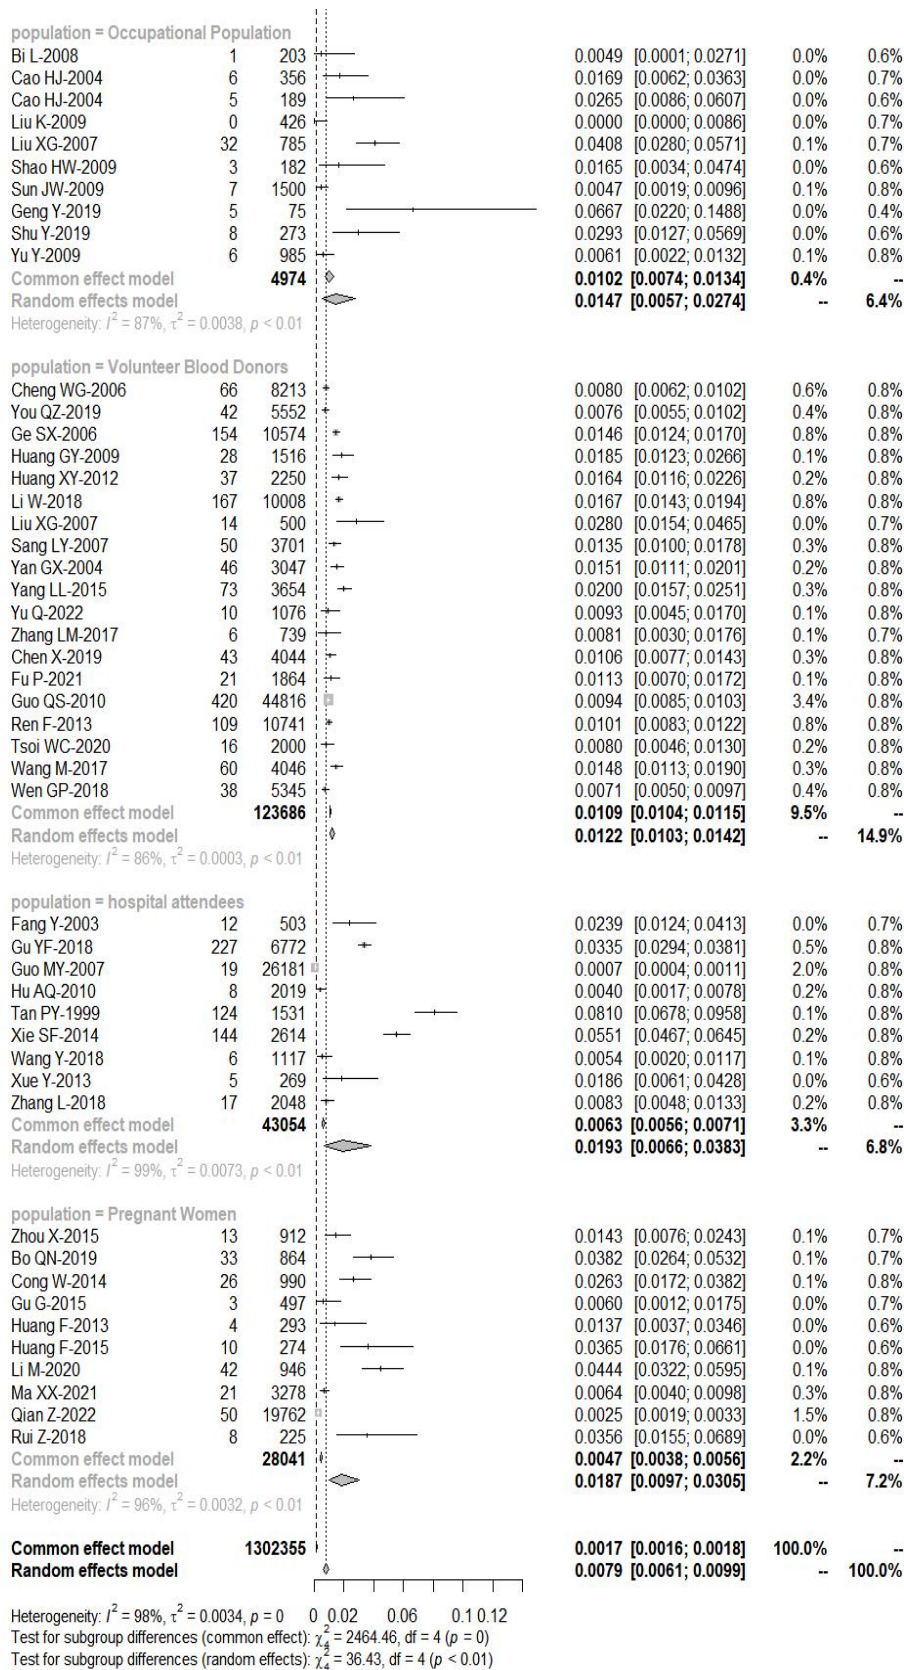

Figure S10. Forest plot of pooled anti-HEV IgM seroprevalence among different population



| Study                                                     | Events | Total | Proportion    | 95%-CI (common)         | Weight (common) | Weight (random) |
|-----------------------------------------------------------|--------|-------|---------------|-------------------------|-----------------|-----------------|
| <b>Gender = Male</b>                                      |        |       |               |                         |                 |                 |
| Zhang ZX-2003                                             | 122    | 334   | 0.3653        | [0.3144; 0.4177]        | 0.2%            | 0.8%            |
| Ai X-2009                                                 | 2739   | 5243  | 0.5224        | [0.5089; 0.5359]        | 2.9%            | 0.8%            |
| Bi L-2008                                                 | 64     | 522   | 0.1226        | [0.0958; 0.1522]        | 0.3%            | 0.8%            |
| Cao HJ-2004                                               | 356    | 902   | 0.3947        | [0.3630; 0.4268]        | 0.5%            | 0.8%            |
| Chen XM-2014                                              | 108    | 346   | 0.3121        | [0.2643; 0.3620]        | 0.2%            | 0.8%            |
| Ning LF-2008                                              | 664    | 1751  | 0.3792        | [0.3566; 0.4021]        | 1.0%            | 0.8%            |
| Chen YZ-2006                                              | 139    | 488   | 0.2848        | [0.2456; 0.3258]        | 0.3%            | 0.8%            |
| Du L-2013                                                 | 4      | 148   | 0.0270        | [0.0058; 0.0606]        | 0.1%            | 0.8%            |
| Gu HY-2013                                                | 205    | 1984  | 0.1033        | [0.0903; 0.1171]        | 1.1%            | 0.8%            |
| Yao XF-2013                                               | 299    | 724   | 0.4130        | [0.3773; 0.4491]        | 0.4%            | 0.8%            |
| Wu Y-2016                                                 | 207    | 960   | 0.2156        | [0.1902; 0.2422]        | 0.5%            | 0.8%            |
| Yao MF-2007                                               | 326    | 606   | 0.5380        | [0.4981; 0.5775]        | 0.3%            | 0.8%            |
| Huang SY-2020                                             | 34     | 241   | 0.1411        | [0.0998; 0.1881]        | 0.1%            | 0.8%            |
| Huang SM-2017                                             | 50     | 1590  | 0.0314        | [0.0234; 0.0406]        | 0.9%            | 0.8%            |
| Meng ZH-2005                                              | 193    | 414   | 0.4662        | [0.4183; 0.5144]        | 0.2%            | 0.8%            |
| Zheng YJ-2005                                             | 176    | 248   | 0.7097        | [0.6515; 0.7646]        | 0.1%            | 0.8%            |
| Kong DG-2017                                              | 379    | 1636  | 0.2317        | [0.2115; 0.2524]        | 0.9%            | 0.8%            |
| Li JT-2014                                                | 125    | 289   | 0.4325        | [0.3758; 0.4901]        | 0.2%            | 0.8%            |
| Li MY-2008                                                | 126    | 426   | 0.2958        | [0.2533; 0.3401]        | 0.2%            | 0.8%            |
| Li WJ-2007                                                | 156    | 727   | 0.2146        | [0.1855; 0.2452]        | 0.4%            | 0.8%            |
| Li YB-2004                                                | 337    | 2014  | 0.1673        | [0.1513; 0.1840]        | 1.1%            | 0.8%            |
| Wang HR-2007                                              | 185    | 772   | 0.2396        | [0.2102; 0.2704]        | 0.4%            | 0.8%            |
| Liu JY-2016                                               | 28     | 1091  | 0.0257        | [0.0170; 0.0360]        | 0.3%            | 0.8%            |
| Liu K-2009                                                | 46     | 497   | 0.0926        | [0.0685; 0.1197]        | 0.3%            | 0.8%            |
| Yu LM-2001                                                | 19     | 160   | 0.1187        | [0.0727; 0.1739]        | 0.1%            | 0.8%            |
| Lu B-2008                                                 | 400    | 991   | 0.4036        | [0.3733; 0.4344]        | 0.5%            | 0.8%            |
| Lu YH-2006                                                | 229    | 327   | 0.7003        | [0.6494; 0.7488]        | 0.2%            | 0.8%            |
| Nong CS-2007                                              | 93     | 187   | 0.4973        | [0.4257; 0.5691]        | 0.1%            | 0.8%            |
| Sun Z-2014                                                | 242    | 768   | 0.3151        | [0.2827; 0.3484]        | 0.4%            | 0.8%            |
| Wang DM-2016                                              | 5      | 265   | 0.0189        | [0.0053; 0.0394]        | 0.1%            | 0.8%            |
| Wang FY-1999                                              | 19     | 283   | 0.0671        | [0.0406; 0.0995]        | 0.2%            | 0.8%            |
| Wang RL-2012                                              | 268    | 974   | 0.2752        | [0.2475; 0.3037]        | 0.5%            | 0.8%            |
| Wu JY-2017                                                | 162    | 1459  | 0.1110        | [0.0954; 0.1277]        | 0.8%            | 0.8%            |
| Xia XW-2015                                               | 435    | 1678  | 0.2592        | [0.2385; 0.2805]        | 0.9%            | 0.8%            |
| Xiao ZB-2022                                              | 570    | 2108  | 0.2704        | [0.2516; 0.2896]        | 1.2%            | 0.8%            |
| Xing XM-2011                                              | 47     | 261   | 0.1801        | [0.1357; 0.2292]        | 0.1%            | 0.8%            |
| Yang F-2012                                               | 435    | 1834  | 0.2372        | [0.2180; 0.2569]        | 1.0%            | 0.8%            |
| Yang B-2013                                               | 15     | 245   | 0.0612        | [0.0342; 0.0951]        | 0.1%            | 0.8%            |
| Yin YZ-2001                                               | 30     | 310   | 0.0968        | [0.0662; 0.1324]        | 0.2%            | 0.8%            |
| Yu WX-2012                                                | 96     | 2852  | 0.0337        | [0.0273; 0.0406]        | 1.6%            | 0.8%            |
| Zhang D-2022                                              | 466    | 3024  | 0.1541        | [0.1414; 0.1672]        | 1.7%            | 0.8%            |
| Zhong CF-2011                                             | 567    | 1558  | 0.3639        | [0.3402; 0.3880]        | 0.9%            | 0.8%            |
| Zhong SQ-2007                                             | 310    | 534   | 0.5805        | [0.5384; 0.6221]        | 0.3%            | 0.8%            |
| Zhu GZ-2015                                               | 1176   | 3810  | 0.3087        | [0.2941; 0.3234]        | 2.1%            | 0.8%            |
| Zhu GZ-2007                                               | 863    | 2518  | 0.3427        | [0.3243; 0.3614]        | 1.4%            | 0.8%            |
| Zhou HF-2006                                              | 28     | 93    | 0.3011        | [0.2116; 0.3987]        | 0.1%            | 0.7%            |
| Cai Y-2017                                                | 169    | 846   | 0.1998        | [0.1735; 0.2274]        | 0.5%            | 0.8%            |
| Chiu DM-2013                                              | 74     | 255   | 0.2902        | [0.2360; 0.3475]        | 0.1%            | 0.8%            |
| Dong C-2012                                               | 1596   | 7620  | 0.2094        | [0.2004; 0.2187]        | 4.2%            | 0.8%            |
| Feng Y-2018                                               | 588    | 800   | 0.7350        | [0.7038; 0.7650]        | 0.4%            | 0.8%            |
| Geng Y-2019                                               | 24     | 196   | 0.1224        | [0.0799; 0.1724]        | 0.1%            | 0.8%            |
| Jia Z-2014                                                | 1970   | 7996  | 0.2464        | [0.2370; 0.2559]        | 4.4%            | 0.8%            |
| Taniguchi M-2009                                          | 56     | 125   | 0.4480        | [0.3615; 0.5361]        | 0.1%            | 0.8%            |
| Li H-2021                                                 | 111    | 2680  | 0.0414        | [0.0342; 0.0493]        | 1.5%            | 0.8%            |
| Li RC-2006                                                | 1576   | 3440  | 0.4581        | [0.4415; 0.4748]        | 1.9%            | 0.8%            |
| Liang H-2014                                              | 44     | 116   | 0.3793        | [0.2929; 0.4697]        | 0.1%            | 0.8%            |
| Liu KSH-2019                                              | 1137   | 3353  | 0.3391        | [0.3232; 0.3552]        | 1.8%            | 0.8%            |
| Lu J-2009                                                 | 941    | 4647  | 0.2025        | [0.1911; 0.2142]        | 2.5%            | 0.8%            |
| Shu Y-2019                                                | 178    | 582   | 0.3058        | [0.2690; 0.3439]        | 0.3%            | 0.8%            |
| Wong KH-2004                                              | 69     | 374   | 0.1845        | [0.1467; 0.2255]        | 0.2%            | 0.8%            |
| Xue Y-2013                                                | 42     | 149   | 0.2819        | [0.2123; 0.3571]        | 0.1%            | 0.8%            |
| Zhang L-2018                                              | 281    | 1054  | 0.2666        | [0.2403; 0.2937]        | 0.6%            | 0.8%            |
| Zhang L-2017                                              | 121    | 287   | 0.4216        | [0.3650; 0.4793]        | 0.2%            | 0.8%            |
| Zhang W-2009                                              | 63     | 779   | 0.0809        | [0.0627; 0.1011]        | 0.4%            | 0.8%            |
| <b>Common effect model</b>                                |        |       | <b>0.2485</b> | <b>[0.2456; 0.2514]</b> | <b>46.7%</b>    | <b>--</b>       |
| <b>Random effects model</b>                               |        |       | <b>0.2564</b> | <b>[0.2133; 0.3020]</b> | <b>--</b>       | <b>50.0%</b>    |
| Heterogeneity: $I^2 = 99\%$ , $\tau^2 = 0.0423$ , $p = 0$ |        |       |               |                         |                 |                 |
| <b>Gender = Female</b>                                    |        |       |               |                         |                 |                 |
| Zhang ZX-2003                                             | 88     | 240   | 0.3667        | [0.3067; 0.4287]        | 0.1%            | 0.8%            |
| Ai X-2009                                                 | 2849   | 7312  | 0.3896        | [0.3785; 0.4009]        | 4.0%            | 0.8%            |
| Bi L-2008                                                 | 43     | 479   | 0.0898        | [0.0657; 0.1171]        | 0.3%            | 0.8%            |
| Cao HJ-2004                                               | 292    | 1032  | 0.2829        | [0.2559; 0.3108]        | 0.6%            | 0.8%            |
| Chen XM-2014                                              | 173    | 522   | 0.3314        | [0.2916; 0.3724]        | 0.3%            | 0.8%            |
| Ning LF-2008                                              | 422    | 1810  | 0.2331        | [0.2139; 0.2529]        | 1.0%            | 0.8%            |
| Chen YZ-2006                                              | 115    | 596   | 0.1930        | [0.1622; 0.2257]        | 0.3%            | 0.8%            |
| Du L-2013                                                 | 3      | 87    | 0.0345        | [0.0043; 0.0856]        | 0.0%            | 0.7%            |
| Gu HY-2013                                                | 300    | 4274  | 0.0702        | [0.0627; 0.0780]        | 2.3%            | 0.8%            |
| Yao XF-2013                                               | 507    | 1288  | 0.3936        | [0.3671; 0.4205]        | 0.7%            | 0.8%            |
| Wu Y-2016                                                 | 274    | 1246  | 0.2199        | [0.1973; 0.2433]        | 0.7%            | 0.8%            |
| Yao MF-2007                                               | 309    | 710   | 0.4352        | [0.3989; 0.4719]        | 0.4%            | 0.8%            |
| Huang SY-2020                                             | 86     | 407   | 0.2113        | [0.1729; 0.2524]        | 0.2%            | 0.8%            |
| Huang SM-2017                                             | 223    | 3755  | 0.0594        | [0.0520; 0.0672]        | 2.1%            | 0.8%            |
| Meng ZH-2005                                              | 220    | 566   | 0.3887        | [0.3489; 0.4292]        | 0.3%            | 0.8%            |
| Zheng YJ-2005                                             | 143    | 264   | 0.5417        | [0.4812; 0.6015]        | 0.1%            | 0.8%            |
| Kong DG-2017                                              | 639    | 2254  | 0.2835        | [0.2651; 0.3023]        | 1.2%            | 0.8%            |
| Li JT-2014                                                | 72     | 167   | 0.4311        | [0.3568; 0.5071]        | 0.1%            | 0.8%            |
| Li MY-2008                                                | 42     | 342   | 0.1228        | [0.0900; 0.1598]        | 0.2%            | 0.8%            |
| Li WJ-2007                                                | 181    | 826   | 0.2191        | [0.1916; 0.2480]        | 0.5%            | 0.8%            |
| Li YB-2004                                                | 235    | 1322  | 0.1778        | [0.1576; 0.1989]        | 0.7%            | 0.8%            |
| Wang HR-2007                                              | 330    | 1437  | 0.2296        | [0.2083; 0.2518]        | 0.8%            | 0.8%            |
| Liu JY-2016                                               | 29     | 1036  | 0.0280        | [0.0187; 0.0390]        | 0.6%            | 0.8%            |
| Liu K-2009                                                | 65     | 442   | 0.1471        | [0.1155; 0.1817]        | 0.2%            | 0.8%            |
| Yu LM-2001                                                | 35     | 257   | 0.1362        | [0.0968; 0.1810]        | 0.1%            | 0.8%            |
| Lu B-2008                                                 | 146    | 473   | 0.3087        | [0.2678; 0.3511]        | 0.3%            | 0.8%            |
| Lu YH-2006                                                | 192    | 336   | 0.5714        | [0.5181; 0.6240]        | 0.2%            | 0.8%            |
| Nong CS-2007                                              | 79     | 190   | 0.4158        | [0.3465; 0.4868]        | 0.1%            | 0.8%            |
| Sun Z-2014                                                | 229    | 715   | 0.3203        | [0.2865; 0.3550]        | 0.4%            | 0.8%            |
| Wang DM-2016                                              | 23     | 735   | 0.0313        | [0.0198; 0.0452]        | 0.4%            | 0.8%            |
| Wang FY-1999                                              | 14     | 247   | 0.0567        | [0.0309; 0.0894]        | 0.1%            | 0.8%            |
| Wang RL-2012                                              | 241    | 1054  | 0.2287        | [0.2038; 0.2545]        | 0.6%            | 0.8%            |
| Wu JY-2017                                                | 148    | 1521  | 0.0973        | [0.0829; 0.1127]        | 0.8%            | 0.8%            |
| Xia XW-2015                                               | 481    | 1835  | 0.2621        | [0.2422; 0.2825]        | 1.0%            | 0.8%            |
| Xiao ZB-2022                                              | 645    | 2550  | 0.2529        | [0.2363; 0.2700]        | 1.4%            | 0.8%            |
| Xing XM-2011                                              | 138    | 551   | 0.2505        | [0.2151; 0.2875]        | 0.3%            | 0.8%            |
| Yang F-2012                                               | 458    | 1937  | 0.2364        | [0.2178; 0.2556]        | 1.1%            | 0.8%            |
| Yang B-2013                                               | 25     | 352   | 0.0710        | [0.0463; 0.1004]        | 0.2%            | 0.8%            |
| Yin YZ-2001                                               | 33     | 366   | 0.0902        | [0.0628; 0.1218]        | 0.2%            | 0.8%            |
| Yu WX-2012                                                | 42     | 2148  | 0.0196        | [0.0141; 0.0259]        | 1.2%            | 0.8%            |
| Zhang D-2022                                              | 534    | 3469  | 0.1539        | [0.1421; 0.1661]        | 1.9%            | 0.8%            |

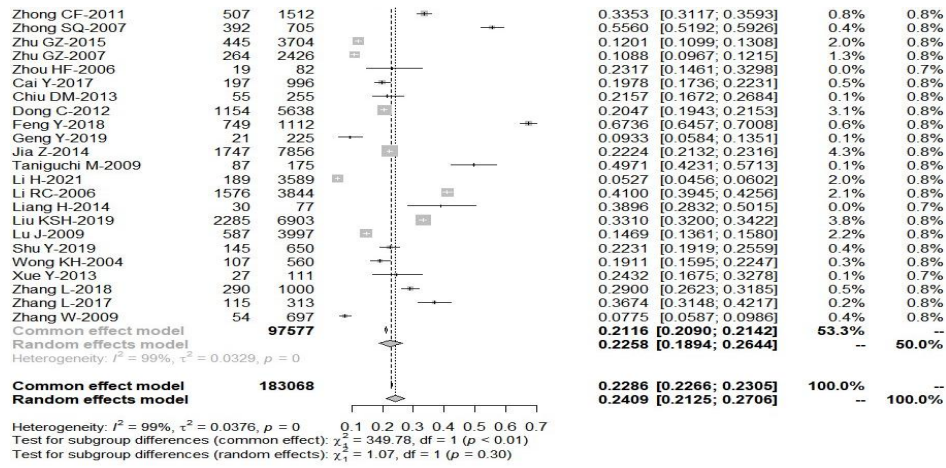

Figure S11. Forest plot of anti-HEV IgG prevalence by gender in the general population

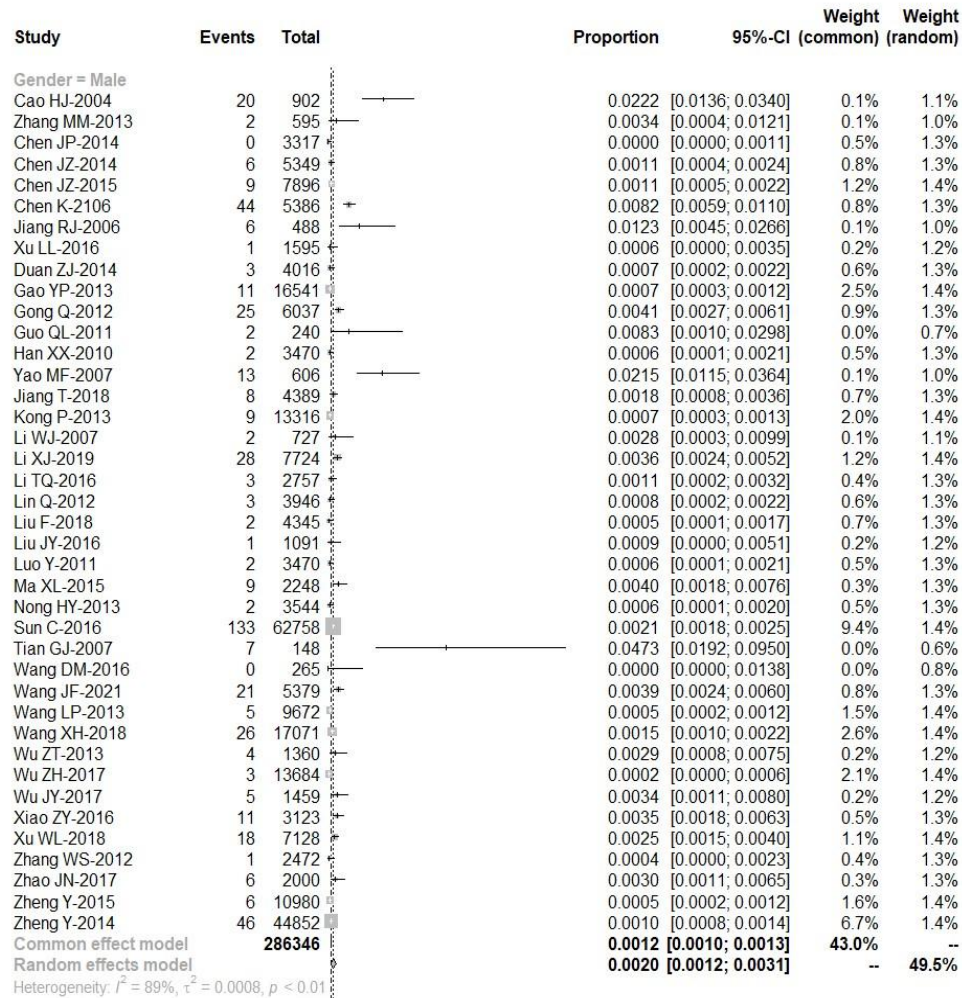

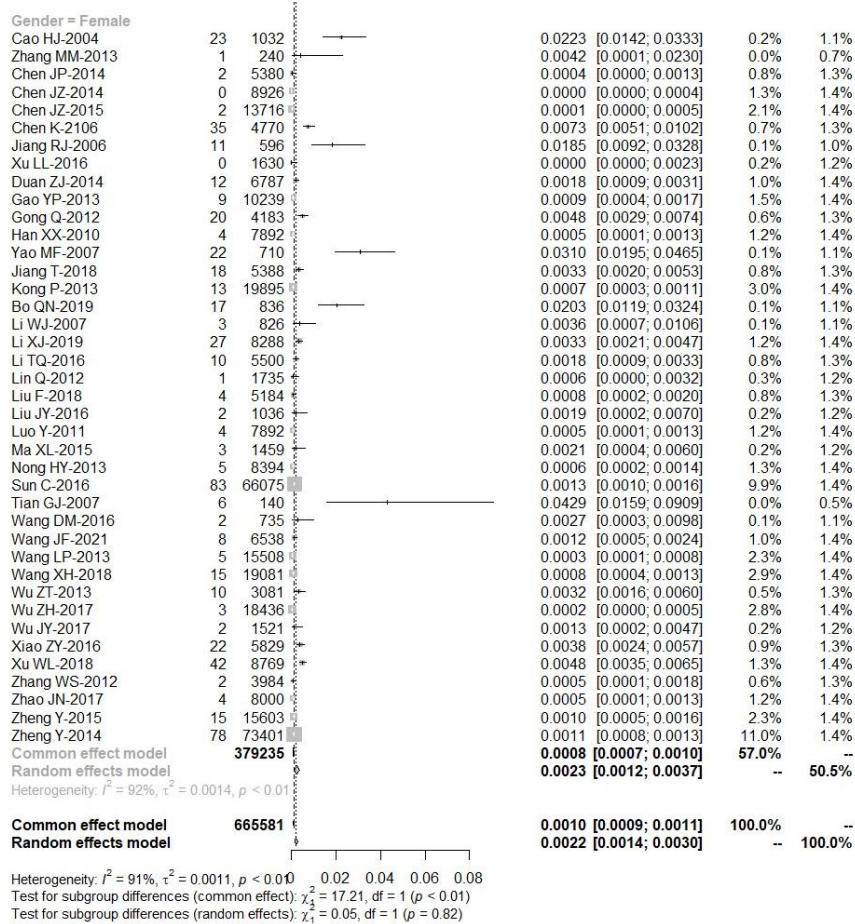

Figure S12. Forest plot of anti-HEV IgM prevalence by gender in the general population

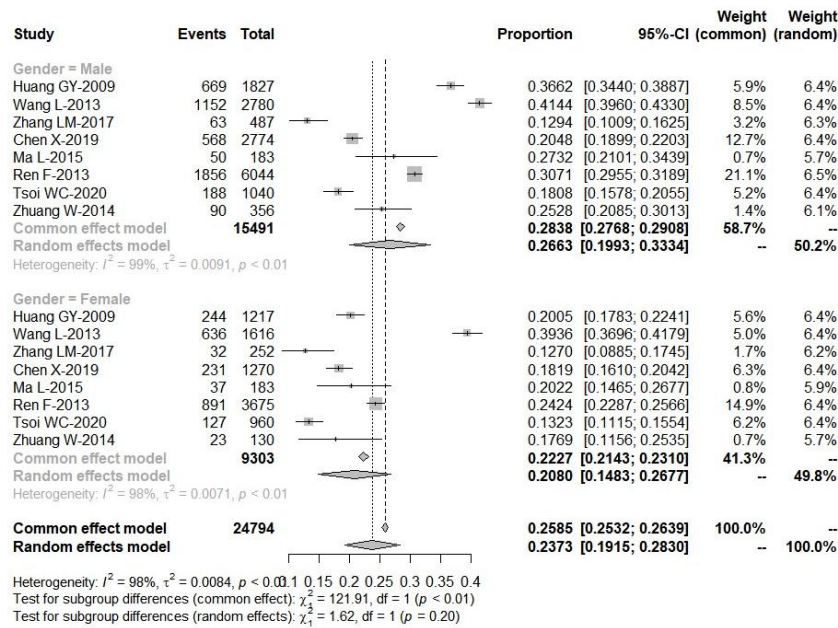

Figure S13. Forest plot of anti-HEV IgG prevalence by gender in volunteer blood donors

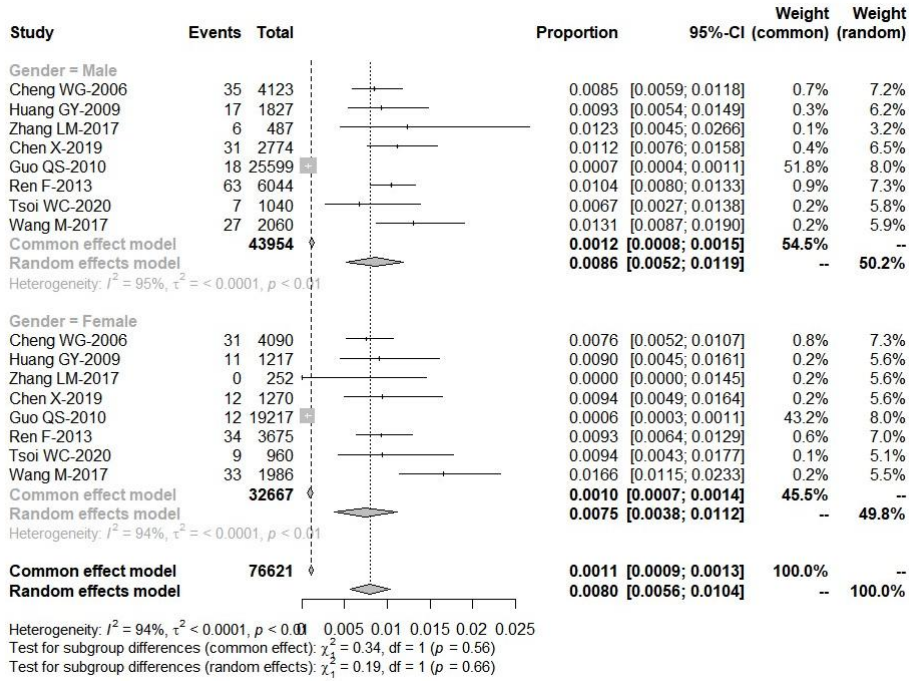

Figure S14. Forest plot of anti-HEV IgM prevalence by gender in volunteer blood donors

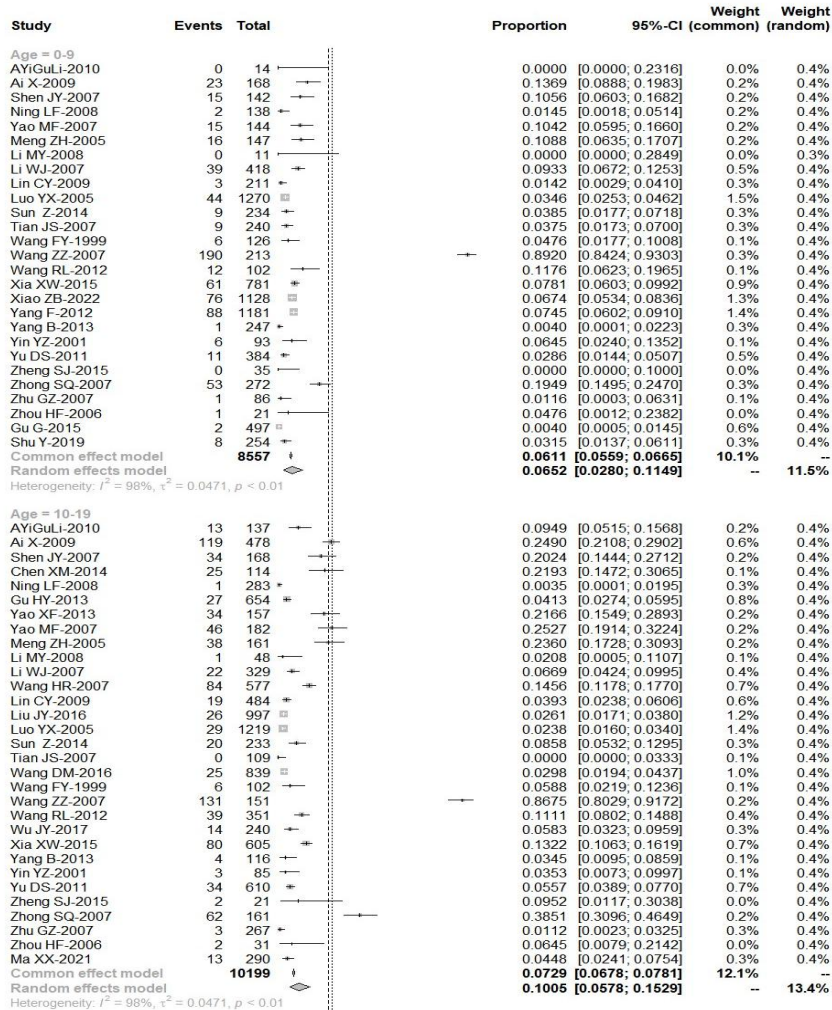

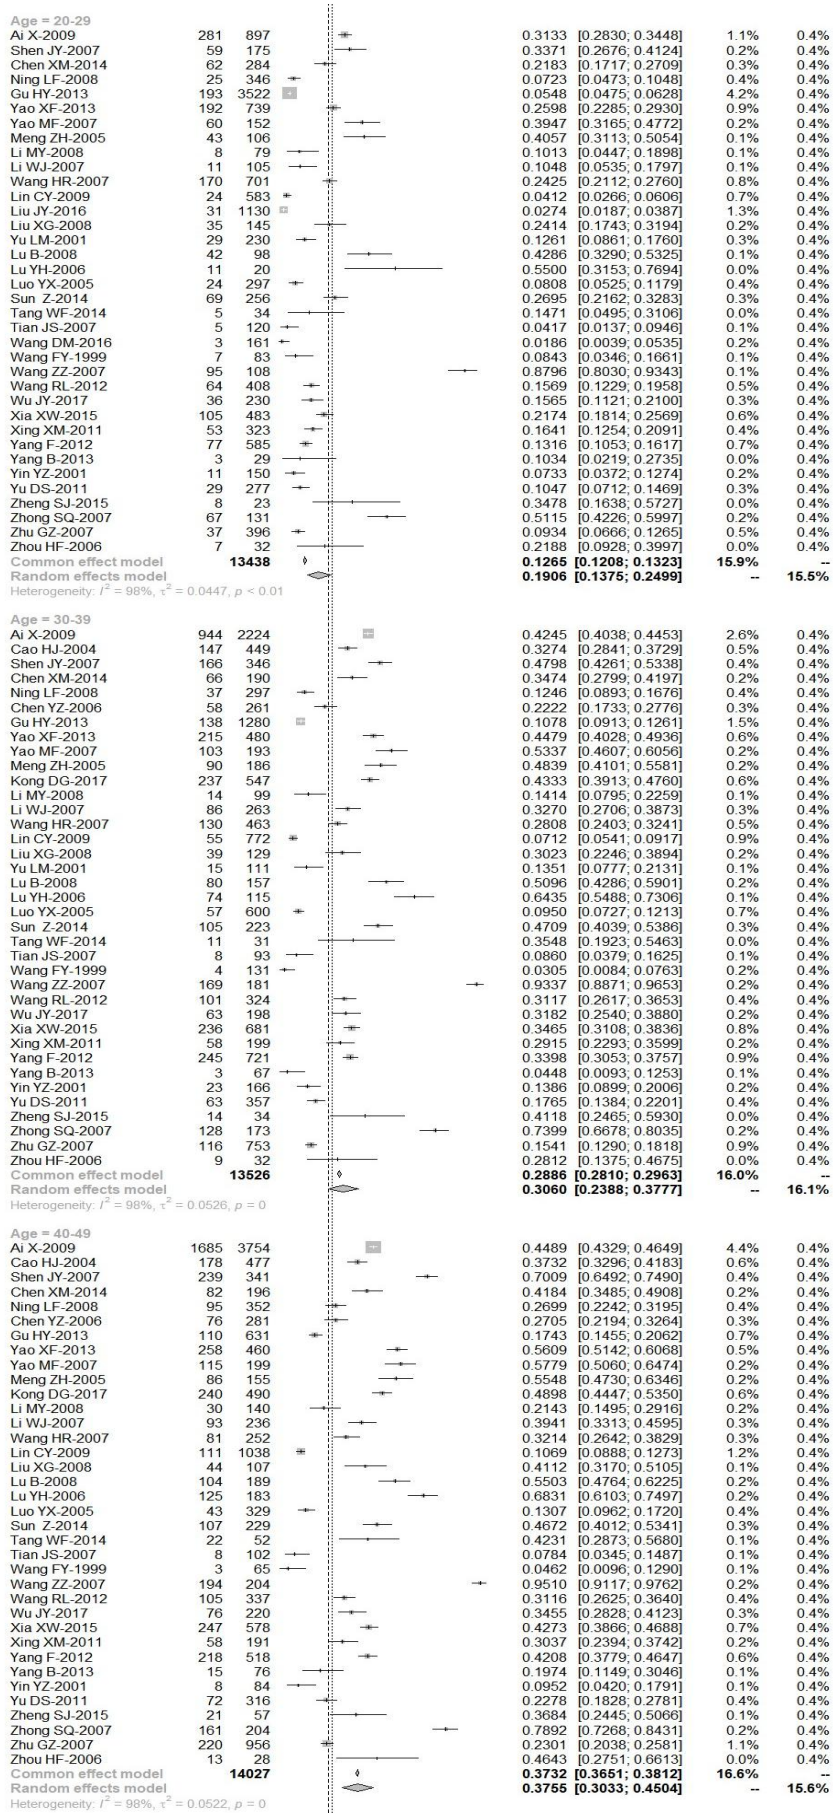

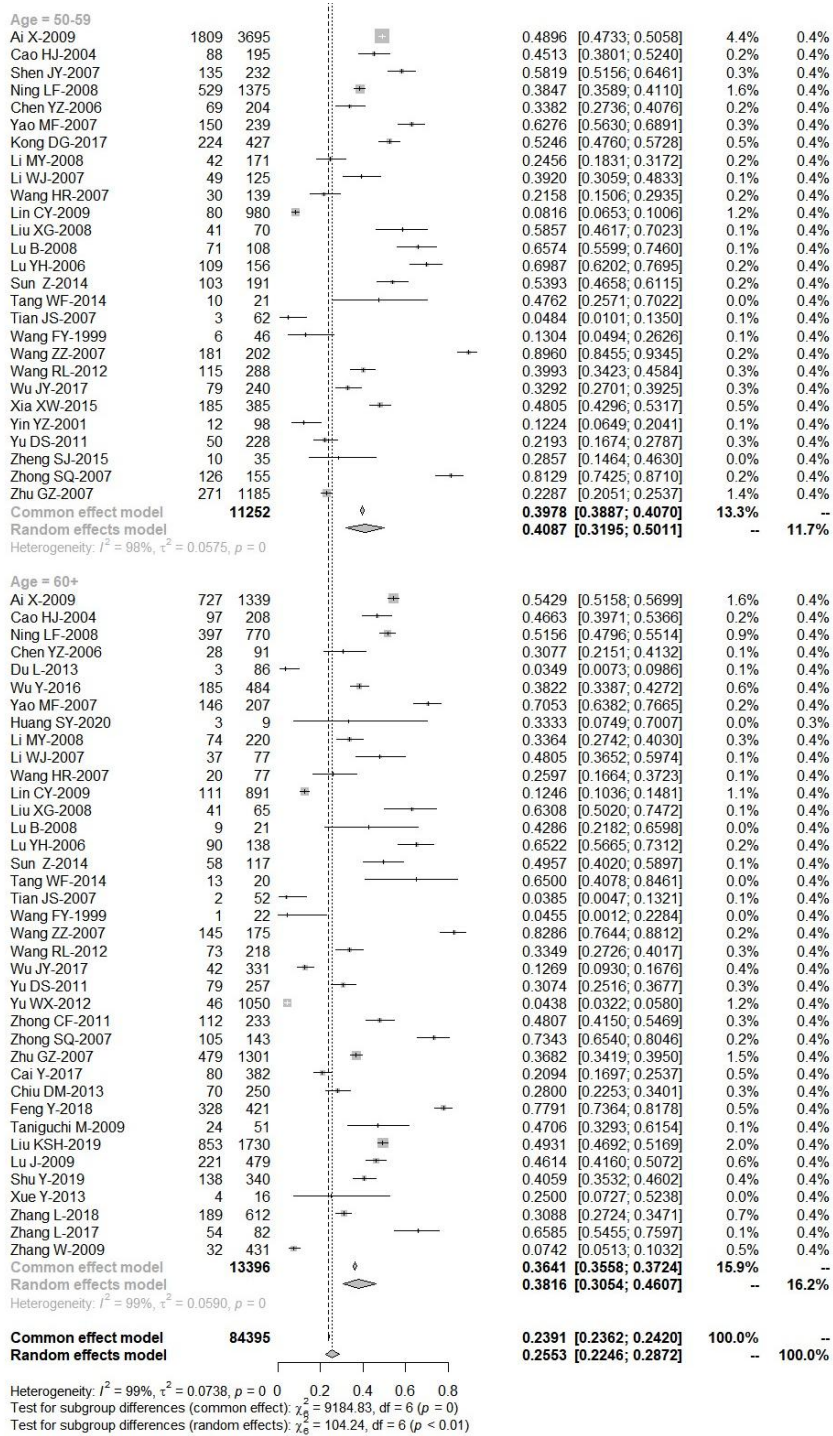

Figure S15. Forest plot of anti-HEV IgG prevalence by age in the general population

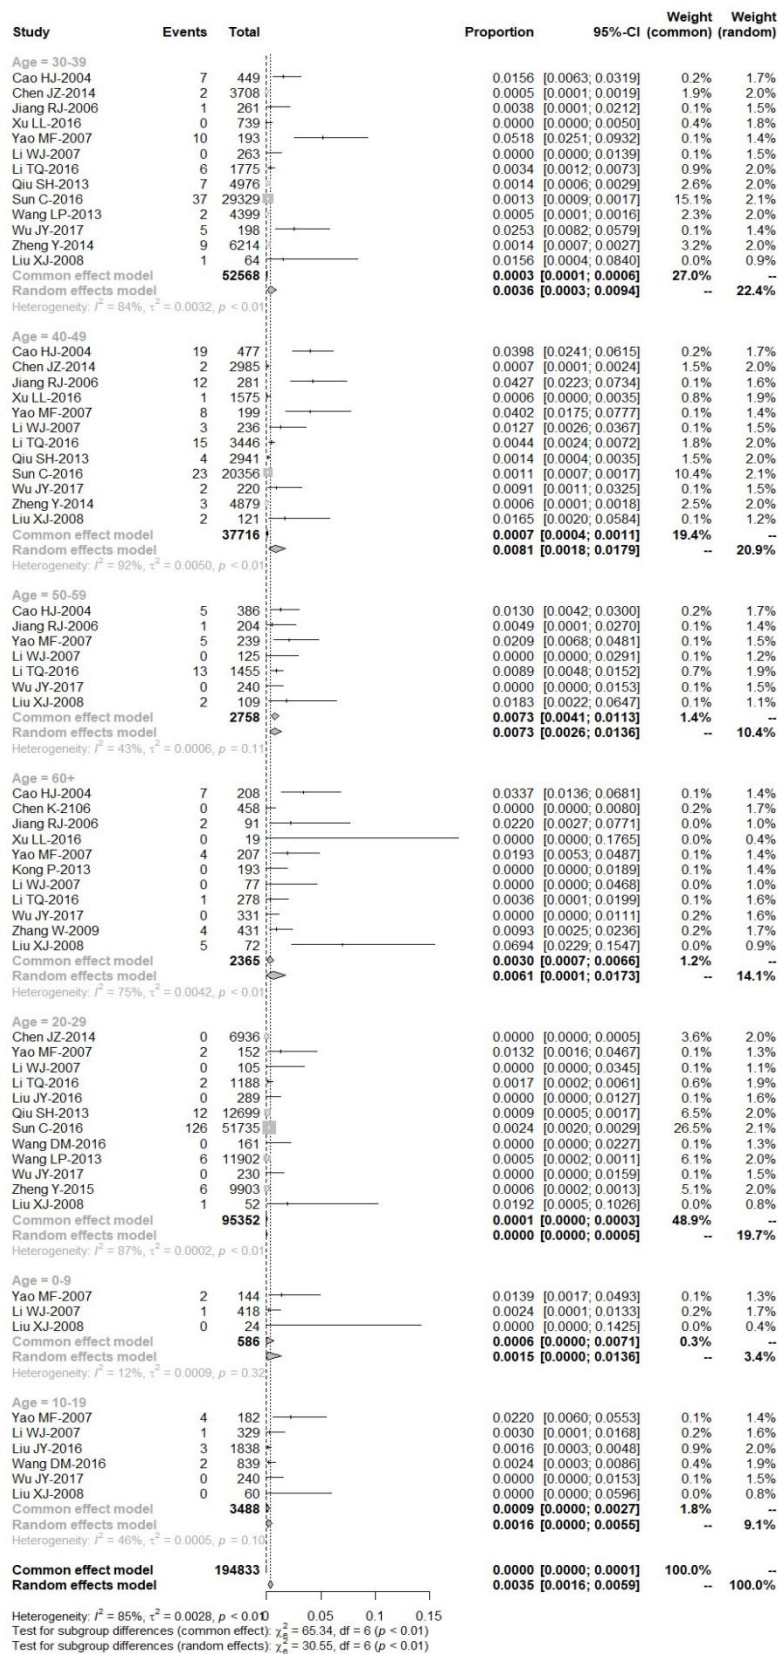

Figure S16. Forest plot of anti-HEV IgM prevalence by age in the general population

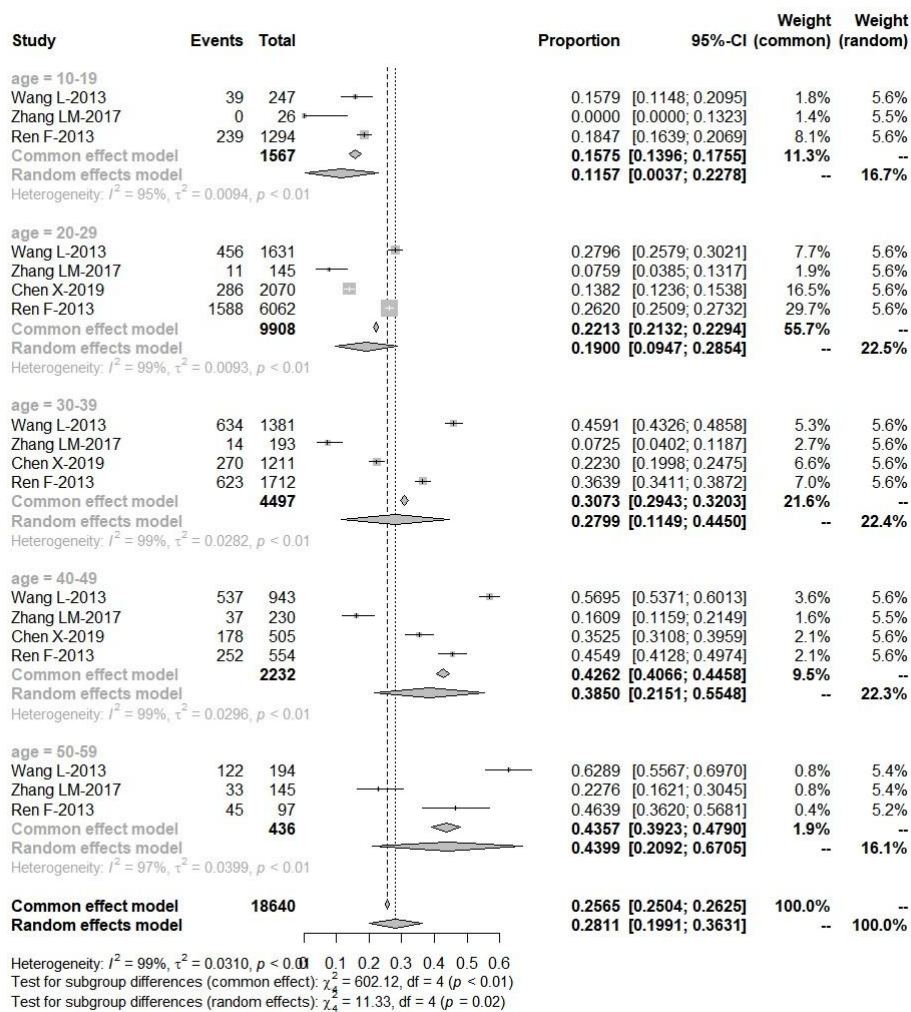

Figure S17. Forest plot of anti-HEV IgG prevalence by age in volunteer blood donors

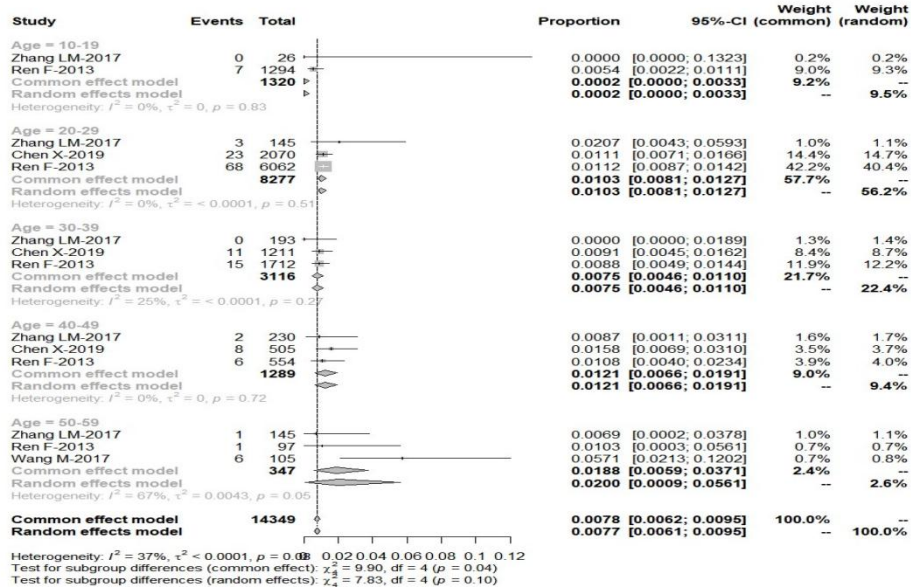

Figure S18. Forest plot of anti-HEV IgM prevalence by age in volunteer blood donors



| Study                                                      | Events | Total         | Proportion    | 95%-CI                  | Weight (common) | Weight (random) |
|------------------------------------------------------------|--------|---------------|---------------|-------------------------|-----------------|-----------------|
| region_1 = The North                                       |        |               |               |                         |                 |                 |
| Zhang ZX-2003                                              | 210    | 574           | 0.3659        | [0.3264; 0.4067]        | 0.2%            | 0.9%            |
| AYiGuLi-2010                                               | 13     | 151           | 0.0861        | [0.0466; 0.1427]        | 0.0%            | 0.9%            |
| Bao ZY-2013                                                | 28     | 180           | 0.1556        | [0.1059; 0.2169]        | 0.1%            | 0.9%            |
| Bi L-2008                                                  | 107    | 1001          | 0.1069        | [0.0884; 0.1277]        | 0.3%            | 0.9%            |
| Du JY-2014                                                 | 295    | 952           | 0.3099        | [0.2806; 0.3403]        | 0.3%            | 0.9%            |
| Gu HY-2013                                                 | 505    | 6258          | 0.0807        | [0.0741; 0.0877]        | 1.8%            | 0.9%            |
| Wu JY-2016                                                 | 287    | 1529          | 0.1877        | [0.1684; 0.2082]        | 0.4%            | 0.9%            |
| Wu JY-2016                                                 | 112    | 312           | 0.3590        | [0.3057; 0.4149]        | 0.1%            | 0.9%            |
| Lu B-2008                                                  | 208    | 1060          | 0.1962        | [0.1727; 0.2214]        | 0.3%            | 0.9%            |
| Bo QN-2019                                                 | 124    | 836           | 0.1483        | [0.1249; 0.1743]        | 0.2%            | 0.9%            |
| Li MY-2008                                                 | 169    | 768           | 0.2201        | [0.1912; 0.2510]        | 0.2%            | 0.9%            |
| Lin CY-2009                                                | 403    | 4959          | 0.0813        | [0.0738; 0.0892]        | 1.4%            | 0.9%            |
| Liu JY-2016                                                | 57     | 2127          | 0.0268        | [0.0204; 0.0346]        | 0.6%            | 0.9%            |
| Liu K-2009                                                 | 111    | 939           | 0.1182        | [0.0983; 0.1406]        | 0.3%            | 0.9%            |
| Lu J-2009                                                  | 259    | 1977          | 0.1310        | [0.1164; 0.1467]        | 0.6%            | 0.9%            |
| Pan TJ-2002                                                | 0      | 1580          | 0.0000        | [0.0000; 0.0023]        | 0.5%            | 0.9%            |
| Shao HW-2009                                               | 41     | 648           | 0.0633        | [0.0458; 0.0849]        | 0.2%            | 0.9%            |
| Sun ZH-2017                                                | 2555   | 47852         | 0.0534        | [0.0514; 0.0554]        | 13.9%           | 0.9%            |
| Wang DM-2016                                               | 28     | 1000          | 0.0280        | [0.0187; 0.0402]        | 0.3%            | 0.9%            |
| Wang FY-1999                                               | 33     | 575           | 0.0574        | [0.0398; 0.0797]        | 0.2%            | 0.9%            |
| Wang RL-2012                                               | 509    | 2028          | 0.2510        | [0.2322; 0.2705]        | 0.6%            | 0.9%            |
| Wu JY-2017                                                 | 310    | 1459          | 0.2125        | [0.1917; 0.2344]        | 0.4%            | 0.9%            |
| Xia XW-2015                                                | 914    | 3513          | 0.2602        | [0.2457; 0.2750]        | 1.0%            | 0.9%            |
| Xing XM-2011                                               | 185    | 812           | 0.2278        | [0.1994; 0.2583]        | 0.2%            | 0.9%            |
| Yin YZ-2001                                                | 63     | 676           | 0.0932        | [0.0724; 0.1177]        | 0.2%            | 0.9%            |
| Yu DS-2011                                                 | 338    | 2429          | 0.1392        | [0.1256; 0.1536]        | 0.7%            | 0.9%            |
| Zhang D-2022                                               | 1000   | 6493          | 0.1540        | [0.1453; 0.1630]        | 1.9%            | 0.9%            |
| Zhang P-2015                                               | 47     | 1195          | 0.0393        | [0.0290; 0.0520]        | 0.3%            | 0.9%            |
| Zhao HL-2012                                               | 17     | 327           | 0.0520        | [0.0306; 0.0819]        | 0.1%            | 0.9%            |
| Zheng SJ-2015                                              | 55     | 205           | 0.2683        | [0.2090; 0.3345]        | 0.1%            | 0.9%            |
| Zhong CF-2011                                              | 1074   | 2627          | 0.4088        | [0.3900; 0.4279]        | 0.8%            | 0.9%            |
| Zhu GZ-2015                                                | 458    | 2957          | 0.1549        | [0.1420; 0.1684]        | 0.9%            | 0.9%            |
| Zhu GZ-2007                                                | 1127   | 4944          | 0.2280        | [0.2163; 0.2399]        | 1.4%            | 0.9%            |
| Cai Y-2017                                                 | 366    | 1842          | 0.1987        | [0.1807; 0.2177]        | 0.5%            | 0.9%            |
| Chang Y-2009                                               | 522    | 2572          | 0.2030        | [0.1876; 0.2190]        | 0.7%            | 0.9%            |
| Cong W-2014                                                | 244    | 965           | 0.2528        | [0.2257; 0.2815]        | 0.3%            | 0.9%            |
| Dong C-2012                                                | 1019   | 6573          | 0.1550        | [0.1464; 0.1640]        | 1.9%            | 0.9%            |
| Fu H-2010                                                  | 70     | 296           | 0.2365        | [0.1892; 0.2891]        | 0.1%            | 0.9%            |
| Shenyang G-2011                                            | 37     | 456           | 0.0811        | [0.0578; 0.1101]        | 0.1%            | 0.9%            |
| Geng Y-2019                                                | 45     | 421           | 0.1069        | [0.0790; 0.1404]        | 0.1%            | 0.9%            |
| Taniguchi M-2009                                           | 143    | 300           | 0.4767        | [0.4190; 0.5348]        | 0.1%            | 0.9%            |
| Li H-2021                                                  | 43     | 2005          | 0.0214        | [0.0156; 0.0288]        | 0.6%            | 0.9%            |
| Ma XX-2021                                                 | 13     | 290           | 0.0448        | [0.0241; 0.0754]        | 0.1%            | 0.9%            |
| Ma Z-2010                                                  | 407    | 2090          | 0.1947        | [0.1780; 0.2124]        | 0.6%            | 0.9%            |
| Yu Y-2009                                                  | 988    | 4508          | 0.2192        | [0.2072; 0.2315]        | 1.3%            | 0.9%            |
| Zhang L-2018                                               | 519    | 2054          | 0.2527        | [0.2340; 0.2721]        | 0.6%            | 0.9%            |
| Common effect model                                        |        | <b>129315</b> | <b>0.1106</b> | <b>[0.1089; 0.1124]</b> | <b>37.5%</b>    | --              |
| Random effects model                                       |        |               | <b>0.1511</b> | <b>[0.1202; 0.1848]</b> | --              | <b>42.7%</b>    |
| Heterogeneity: $I^2 = 100\%$ , $\tau^2 = 0.0239$ , $p = 0$ |        |               |               |                         |                 |                 |
| region_1 = The South                                       |        |               |               |                         |                 |                 |
| Ai X-2009                                                  | 5588   | 12555         | 0.4451        | [0.4364; 0.4538]        | 3.6%            | 0.9%            |
| Cao HJ-2004                                                | 648    | 1934          | 0.3351        | [0.3140; 0.3566]        | 0.6%            | 0.9%            |
| Shen JY-2007                                               | 749    | 1570          | 0.4771        | [0.4521; 0.5021]        | 0.5%            | 0.9%            |
| Chen XM-2014                                               | 281    | 868           | 0.3237        | [0.2927; 0.3560]        | 0.3%            | 0.9%            |
| Ning LF-2008                                               | 1086   | 3561          | 0.3050        | [0.2899; 0.3204]        | 1.0%            | 0.9%            |
| Chen YZ-2006                                               | 254    | 1084          | 0.2343        | [0.2094; 0.2607]        | 0.3%            | 0.9%            |
| Cheng Y-2007                                               | 10     | 140           | 0.0714        | [0.0348; 0.1274]        | 0.0%            | 0.9%            |
| Du L-2013                                                  | 7      | 235           | 0.0298        | [0.0121; 0.0604]        | 0.1%            | 0.9%            |
| Fan LZ-2012                                                | 0      | 158           | 0.0000        | [0.0000; 0.0231]        | 0.0%            | 0.9%            |
| Gong YH-2005                                               | 134    | 144           | 0.9306        | [0.8760; 0.9662]        | 0.0%            | 0.9%            |
| Yao XF-2013                                                | 806    | 2012          | 0.4006        | [0.3791; 0.4224]        | 0.6%            | 0.9%            |
| Wu Y-2016                                                  | 482    | 2206          | 0.2185        | [0.2014; 0.2363]        | 0.6%            | 0.9%            |
| Yao MF-2007                                                | 635    | 1316          | 0.4825        | [0.4552; 0.5099]        | 0.4%            | 0.9%            |
| Huang SY-2020                                              | 120    | 648           | 0.1852        | [0.1560; 0.2173]        | 0.2%            | 0.9%            |
| Huang SM-2017                                              | 273    | 5345          | 0.0511        | [0.0453; 0.0573]        | 1.6%            | 0.9%            |
| Meng ZH-2005                                               | 413    | 980           | 0.4214        | [0.3903; 0.4531]        | 0.3%            | 0.9%            |
| Wang FD-2004                                               | 394    | 850           | 0.4635        | [0.4296; 0.4977]        | 0.2%            | 0.9%            |
| Zheng YJ-2005                                              | 319    | 512           | 0.6230        | [0.5795; 0.6652]        | 0.1%            | 0.9%            |
| Kong DG-2017                                               | 825    | 1945          | 0.4242        | [0.4021; 0.4465]        | 0.6%            | 0.9%            |
| Li B-2003                                                  | 14     | 178           | 0.0787        | [0.0437; 0.1284]        | 0.1%            | 0.9%            |
| Li JT-2014                                                 | 197    | 456           | 0.4320        | [0.3860; 0.4789]        | 0.1%            | 0.9%            |
| Li WJ-2007                                                 | 337    | 1553          | 0.2170        | [0.1967; 0.2383]        | 0.5%            | 0.9%            |
| Li YB-2004                                                 | 572    | 3336          | 0.1715        | [0.1588; 0.1847]        | 1.0%            | 0.9%            |
| Wang HR-2007                                               | 515    | 2209          | 0.2331        | [0.2156; 0.2513]        | 0.6%            | 0.9%            |
| Liu XG-2007                                                | 81     | 300           | 0.2700        | [0.2206; 0.3240]        | 0.1%            | 0.9%            |
| Liu XG-2008                                                | 209    | 566           | 0.3693        | [0.3294; 0.4105]        | 0.2%            | 0.9%            |
| Yu LM-2001                                                 | 54     | 417           | 0.1295        | [0.0988; 0.1656]        | 0.1%            | 0.9%            |
| Lu YH-2006                                                 | 421    | 663           | 0.6350        | [0.5971; 0.6717]        | 0.2%            | 0.9%            |
| Luo YX-2005                                                | 215    | 3864          | 0.0556        | [0.0486; 0.0633]        | 1.1%            | 0.9%            |
| Ma TW-2013                                                 | 3      | 90            | 0.0333        | [0.0069; 0.0943]        | 0.0%            | 0.9%            |
| Nong CS-2007                                               | 172    | 377           | 0.4562        | [0.4051; 0.5080]        | 0.1%            | 0.9%            |
| Pan YL-2021                                                | 0      | 103794        | 0.0000        | [0.0000; 0.0000]        | 30.1%           | 0.9%            |
| Sun Z-2014                                                 | 471    | 1483          | 0.3176        | [0.2939; 0.3420]        | 0.4%            | 0.9%            |
| Tang WF-2014                                               | 61     | 158           | 0.3861        | [0.3098; 0.4667]        | 0.0%            | 0.9%            |
| Tian JS-2007                                               | 35     | 778           | 0.0450        | [0.0315; 0.0620]        | 0.2%            | 0.9%            |
| Wang ZZ-2007                                               | 1105   | 1234          | 0.8955        | [0.8770; 0.9120]        | 0.4%            | 0.9%            |
| Wu CH-2003                                                 | 4      | 148           | 0.0270        | [0.0074; 0.0678]        | 0.0%            | 0.9%            |
| Xiao ZB-2022                                               | 1217   | 4661          | 0.2611        | [0.2485; 0.2740]        | 1.4%            | 0.9%            |
| Yang F-2012                                                | 893    | 3771          | 0.2368        | [0.2233; 0.2507]        | 1.1%            | 0.9%            |
| Yang B-2013                                                | 40     | 597           | 0.0670        | [0.0483; 0.0901]        | 0.2%            | 0.9%            |
| Yu WX-2012                                                 | 138    | 5000          | 0.0276        | [0.0232; 0.0325]        | 1.5%            | 0.9%            |
| Zhang XF-2007                                              | 2152   | 4139          | 0.5199        | [0.5046; 0.5353]        | 1.2%            | 0.9%            |
| Zheng RD-2013                                              | 207    | 850           | 0.2435        | [0.2150; 0.2738]        | 0.2%            | 0.9%            |
| Zhong SQ-2007                                              | 702    | 1239          | 0.5666        | [0.5385; 0.5944]        | 0.4%            | 0.9%            |
| Zhou HF-2006                                               | 47     | 175           | 0.2686        | [0.2045; 0.3407]        | 0.1%            | 0.9%            |

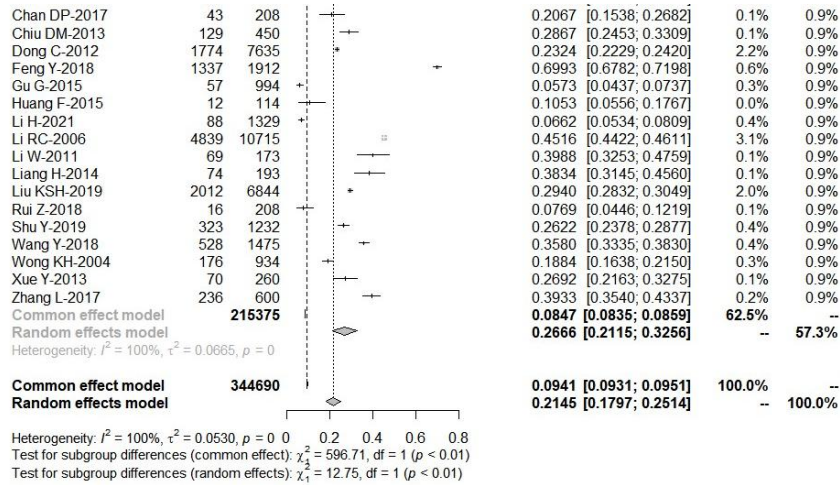

Figure S19. Forest plot of anti-HEV IgG prevalence in the general population in the North and South regions

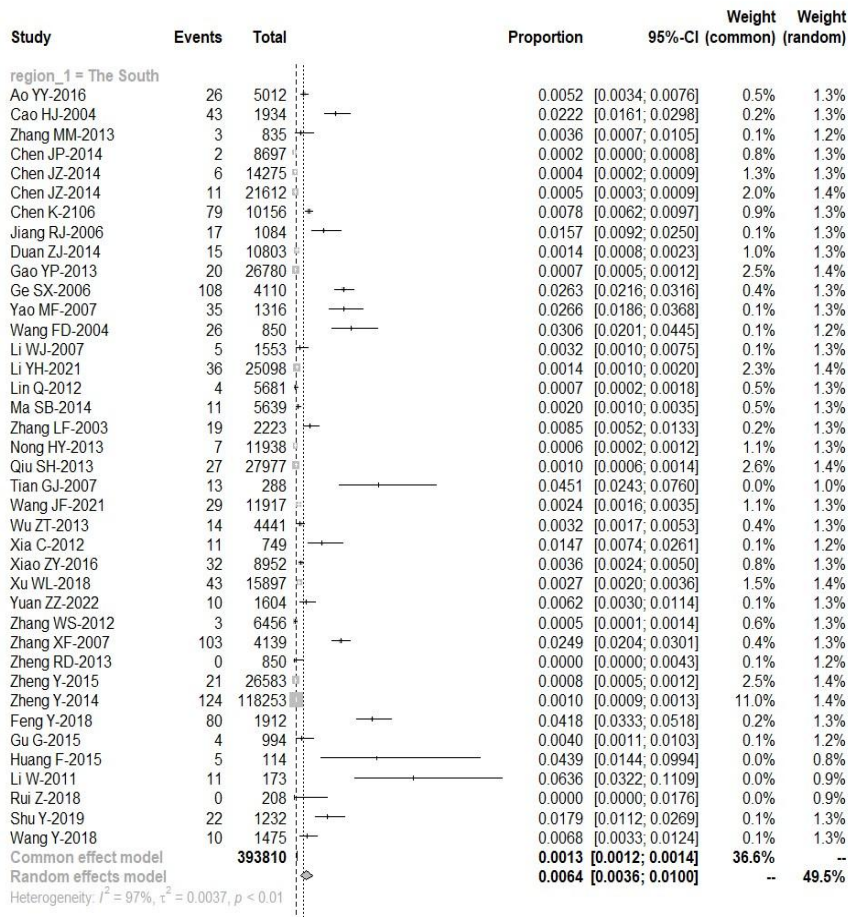

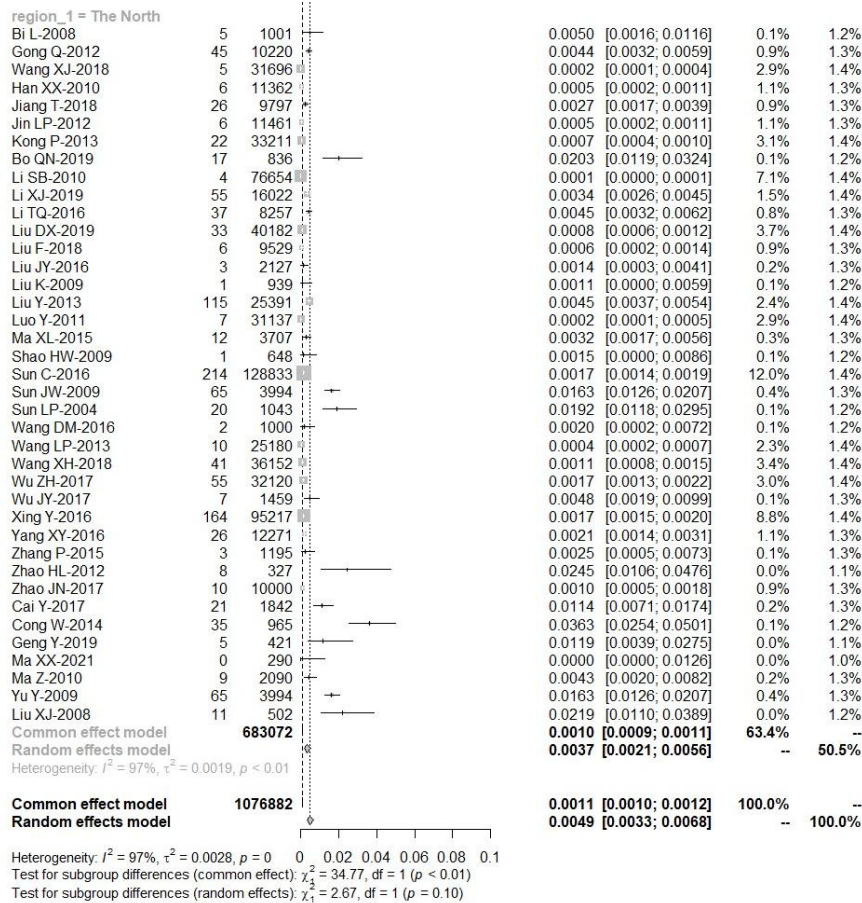

Figure S20. Forest plot of anti-HEV IgM prevalence in the general population in the North and South regions

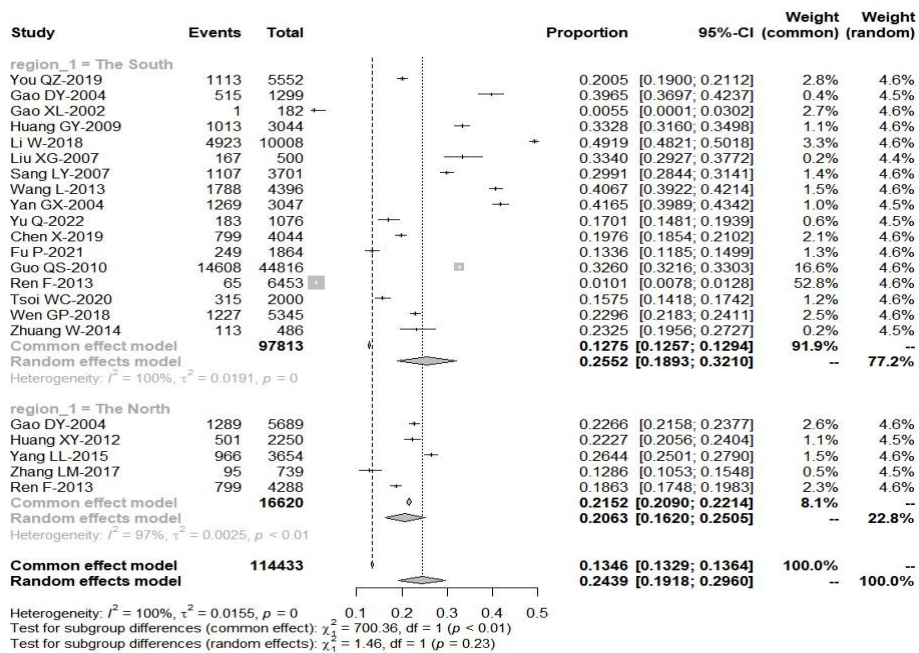

Figure S21. Forest plot of anti-HEV IgG prevalence in volunteer blood donors in the North and South regions

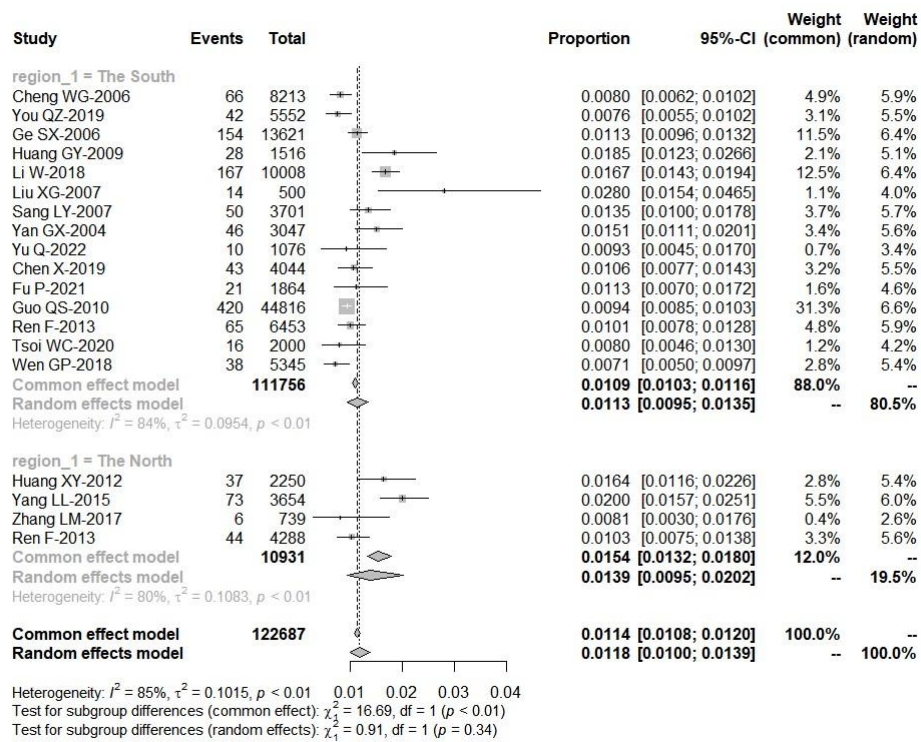

Figure S22. Forest plot of anti-HEV IgM prevalence in volunteer blood donors in the North and South regions

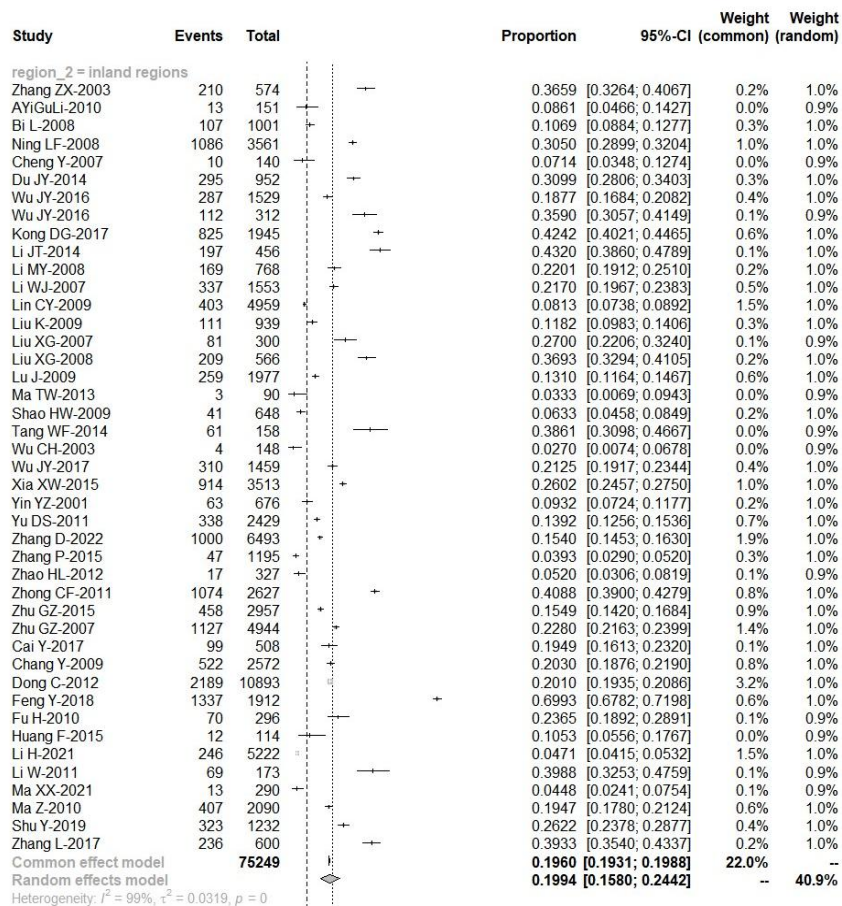

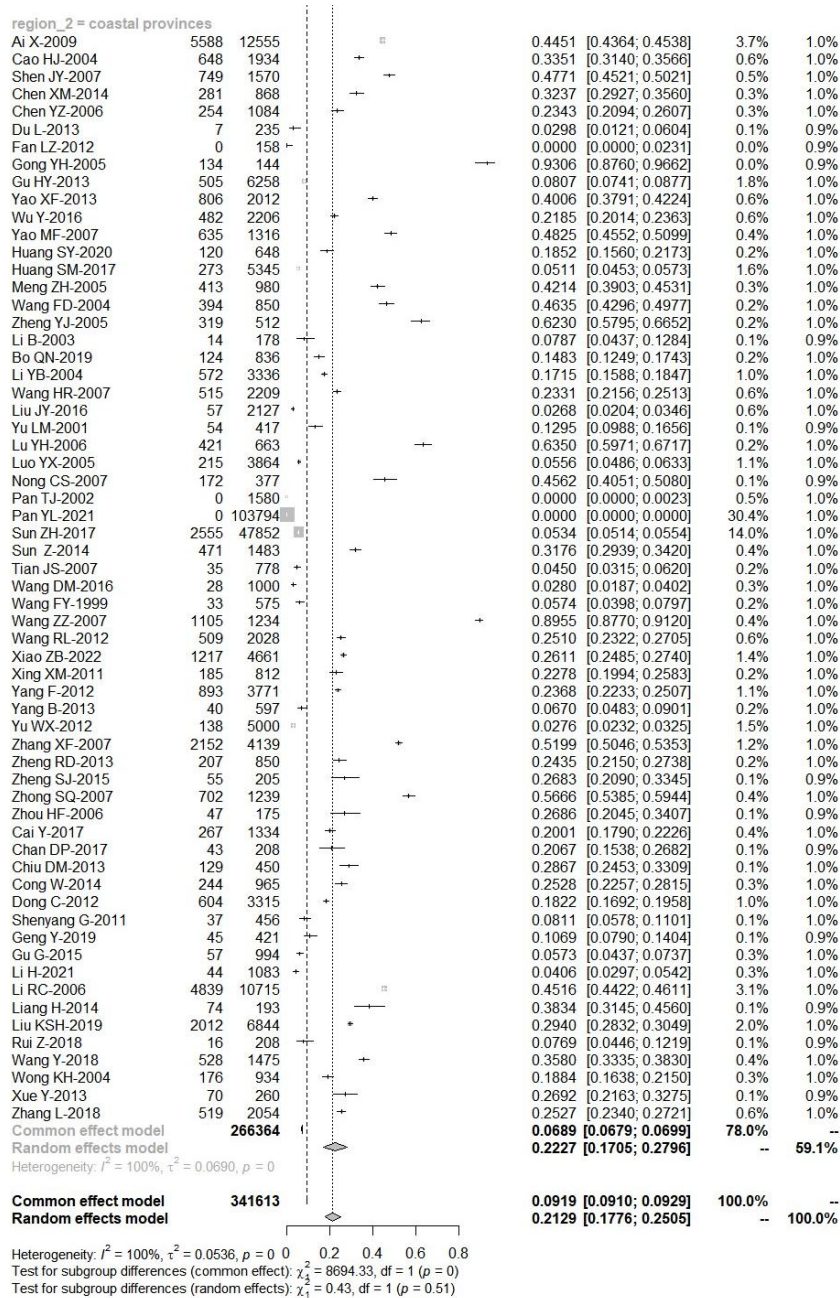

Figure S23. Forest plot of anti-HEV IgG prevalence in the general population in the coastal and inland areas

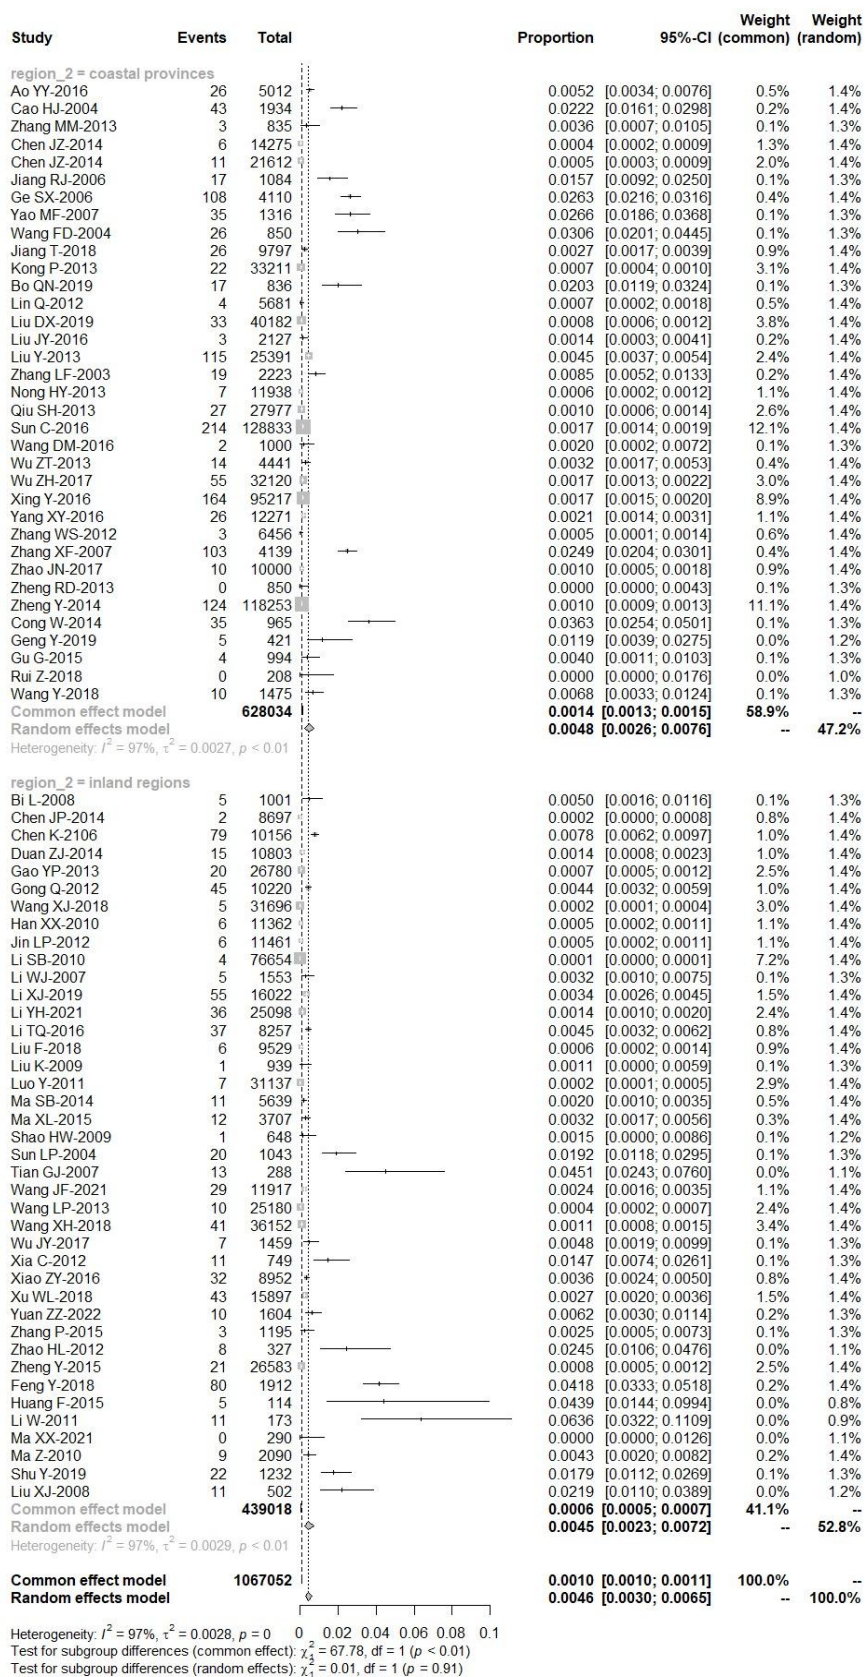

Figure S24. Forest plot of anti-HEV IgM prevalence in the general population in the coastal and inland areas

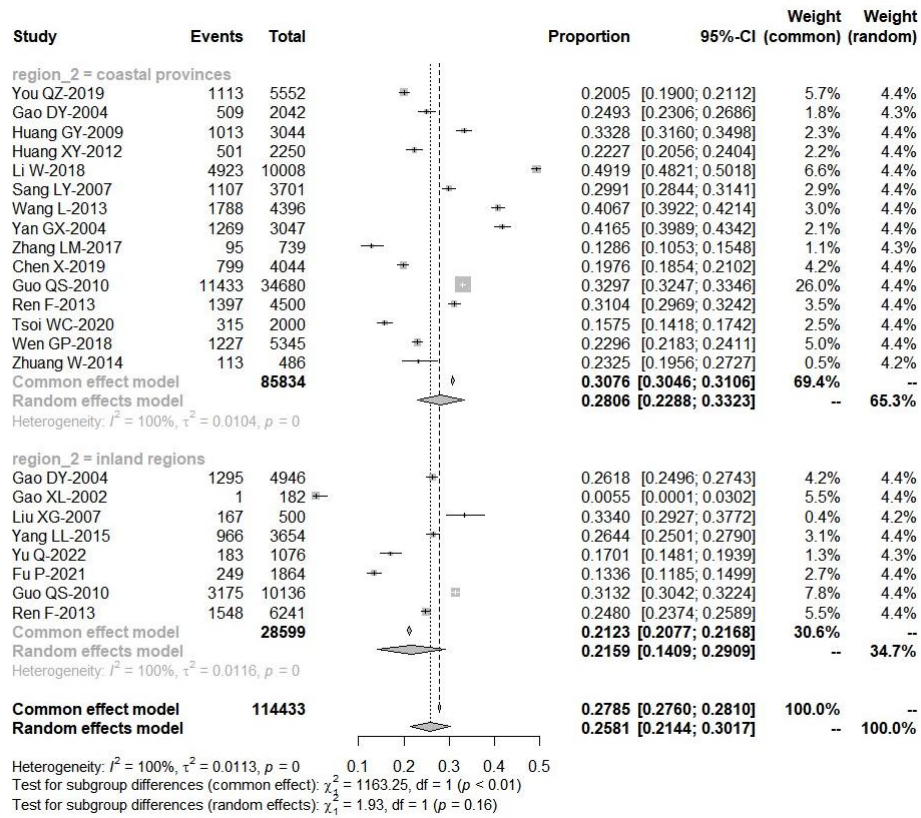

Figure S25. Forest plot of anti-HEV IgG prevalence in volunteer blood donors in the coastal and inland areas

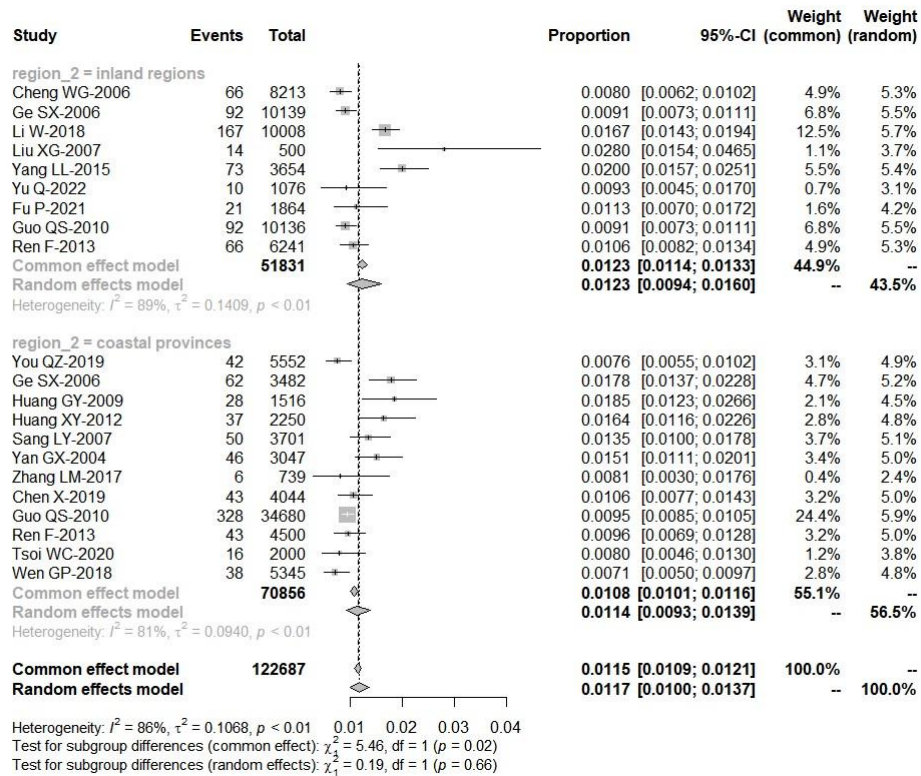

Figure S26. Forest plot of anti-HEV IgM prevalence in volunteer blood donors in the coastal and inland areas





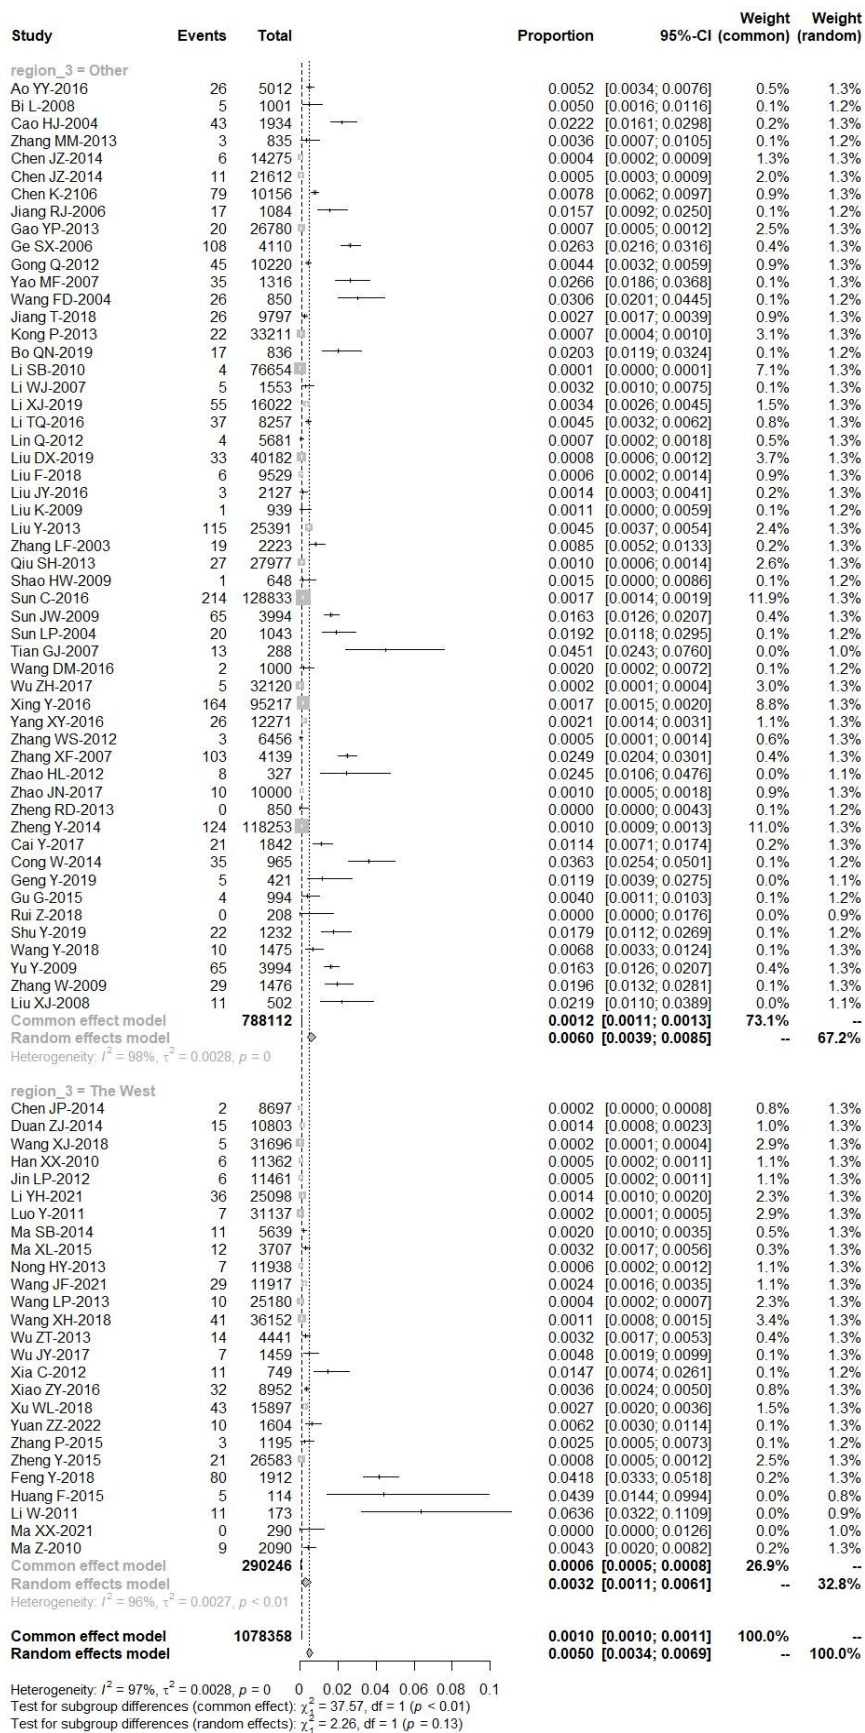

Figure S28. Forest plot of anti-HEV IgM prevalence in the general population in the western and non-western regions

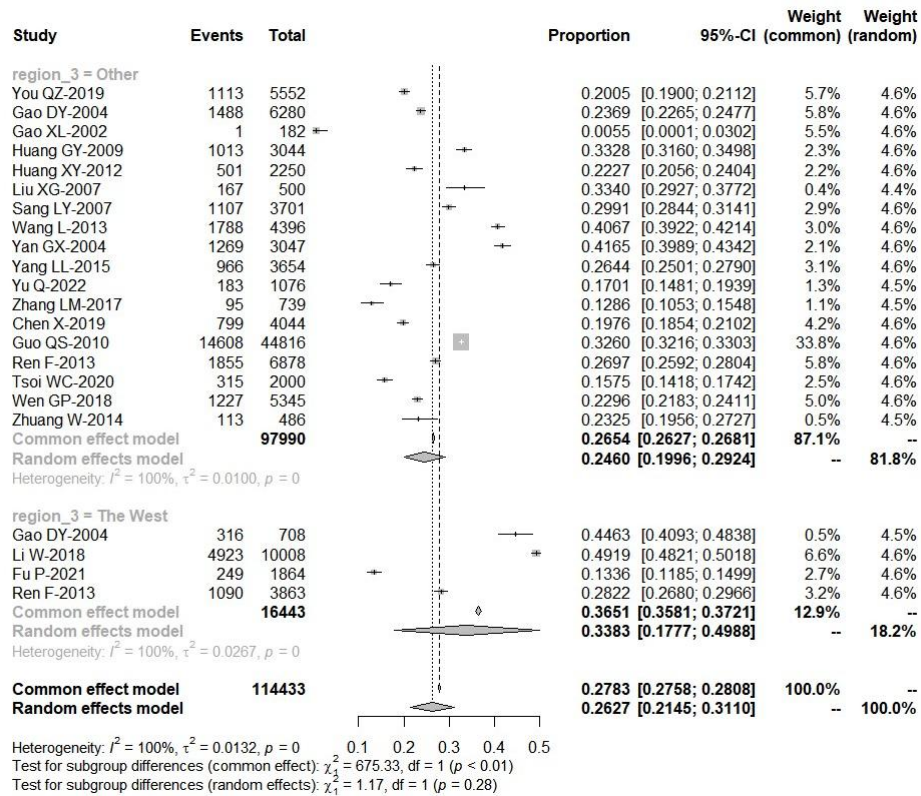

Figure S29. Forest plot of anti-HEV IgG prevalence in volunteer blood donors in the western and non-western regions

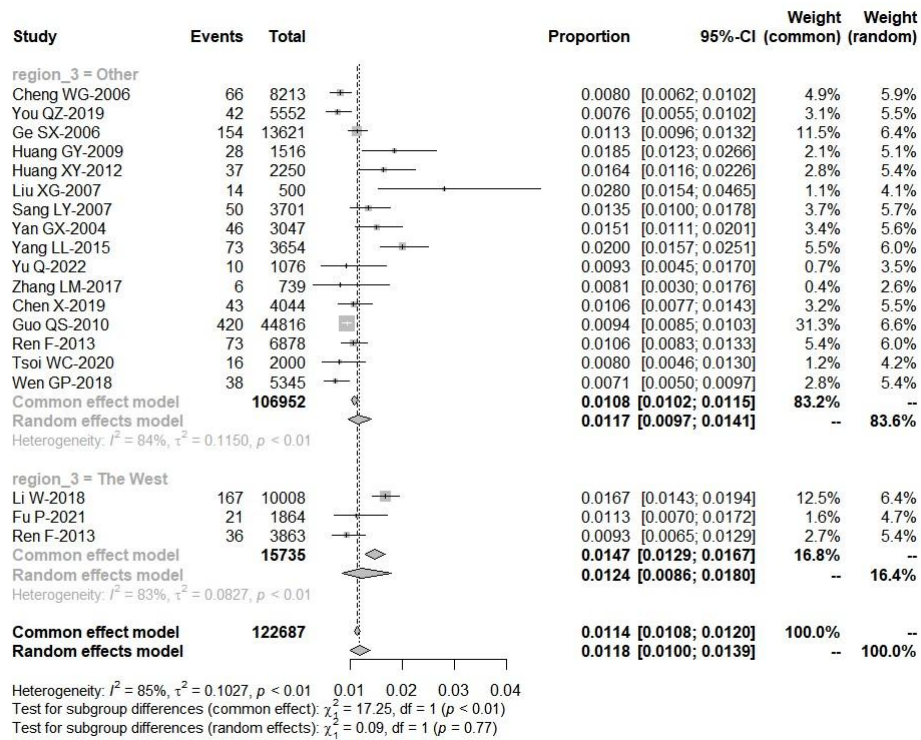

Figure S30. Forest plot of anti-HEV IgM prevalence in volunteer blood donors in the western and non-western regions

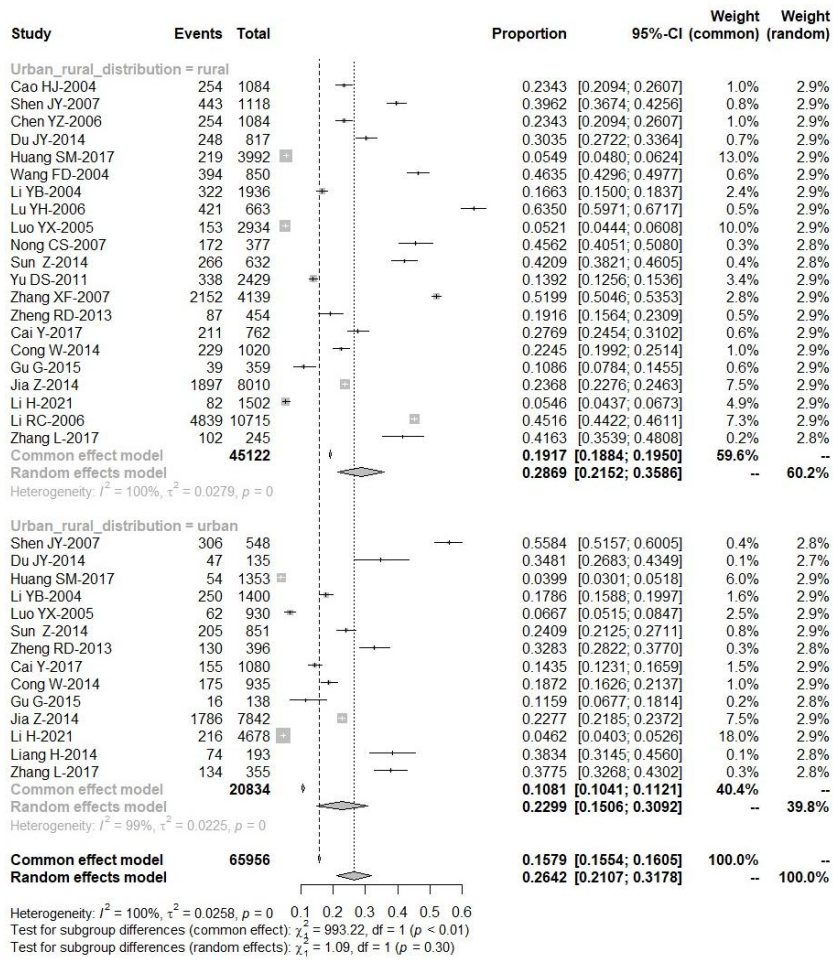

Figure S31. Forest plot of anti-HEV IgG prevalence in the general population in the urban and rural areas

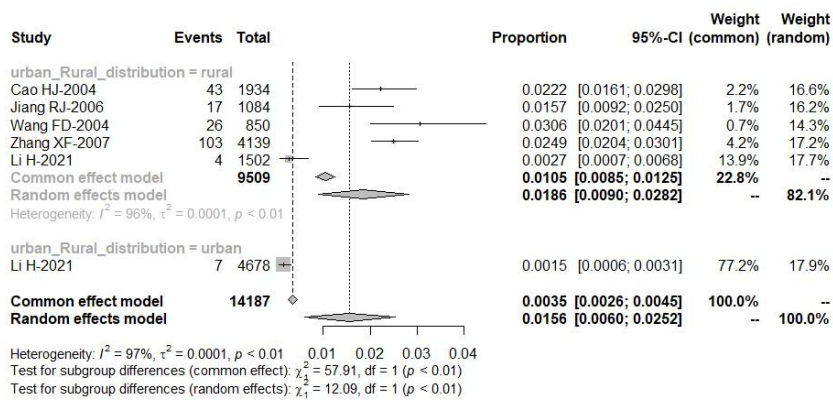

Figure S32. Forest plot of anti-HEV IgM prevalence in the general population in the urban and rural areas

| Study                                                      | Events | Total        | Proportion    | 95%-CI (common)         | Weight (common) | Weight (random) |
|------------------------------------------------------------|--------|--------------|---------------|-------------------------|-----------------|-----------------|
| Studyperiod = 2001-2005                                    |        |              |               |                         |                 |                 |
| Zhang ZX-2003                                              | 210    | 574          | 0.3659        | [0.3264; 0.4067]        | 0.1%            | 0.9%            |
| Ai X-2009                                                  | 5588   | 12555        | 0.4451        | [0.4364; 0.4538]        | 3.0%            | 0.9%            |
| Cao HJ-2004                                                | 648    | 1934         | 0.3351        | [0.3140; 0.3566]        | 0.5%            | 0.9%            |
| Shen JY-2007                                               | 749    | 1570         | 0.4771        | [0.4521; 0.5021]        | 0.4%            | 0.9%            |
| Chen YZ-2006                                               | 254    | 1084         | 0.2343        | [0.2094; 0.2607]        | 0.3%            | 0.9%            |
| Gong YH-2005                                               | 134    | 144          | 0.9306        | [0.8760; 0.9662]        | 0.0%            | 0.9%            |
| Yao MF-2007                                                | 635    | 1316         | 0.4825        | [0.4552; 0.5099]        | 0.3%            | 0.9%            |
| Meng ZH-2005                                               | 413    | 980          | 0.4214        | [0.3903; 0.4531]        | 0.2%            | 0.9%            |
| Wang FD-2004                                               | 394    | 850          | 0.4635        | [0.4296; 0.4977]        | 0.2%            | 0.9%            |
| Zheng YJ-2005                                              | 319    | 512          | 0.6230        | [0.5795; 0.6652]        | 0.1%            | 0.9%            |
| Li B-2003                                                  | 14     | 178          | 0.0787        | [0.0437; 0.1284]        | 0.0%            | 0.9%            |
| Li WJ-2007                                                 | 337    | 1553         | 0.2170        | [0.1967; 0.2383]        | 0.4%            | 0.9%            |
| Li YB-2004                                                 | 572    | 3336         | 0.1715        | [0.1588; 0.1847]        | 0.8%            | 0.9%            |
| Wang HR-2007                                               | 515    | 2209         | 0.2331        | [0.2156; 0.2513]        | 0.5%            | 0.9%            |
| Liu XG-2007                                                | 81     | 300          | 0.2700        | [0.2206; 0.3240]        | 0.1%            | 0.9%            |
| Lu YH-2006                                                 | 421    | 663          | 0.6350        | [0.5971; 0.6717]        | 0.2%            | 0.9%            |
| Luo YX-2005                                                | 215    | 3864         | 0.0556        | [0.0486; 0.0633]        | 0.9%            | 0.9%            |
| Nong CS-2007                                               | 172    | 377          | 0.4562        | [0.4051; 0.5080]        | 0.1%            | 0.9%            |
| Tian JS-2007                                               | 35     | 778          | 0.0450        | [0.0315; 0.0620]        | 0.2%            | 0.9%            |
| Wang ZZ-2007                                               | 1105   | 1234         | 0.8955        | [0.8770; 0.9120]        | 0.3%            | 0.9%            |
| Wu CH-2003                                                 | 4      | 148          | 0.0270        | [0.0074; 0.0678]        | 0.0%            | 0.9%            |
| Zhang XF-2007                                              | 2152   | 4139         | 0.5199        | [0.5046; 0.5353]        | 1.0%            | 0.9%            |
| Zhong SQ-2007                                              | 702    | 1239         | 0.5666        | [0.5385; 0.5944]        | 0.3%            | 0.9%            |
| Zhu GZ-2007                                                | 1127   | 4944         | 0.2280        | [0.2163; 0.2399]        | 1.2%            | 0.9%            |
| Jia Z-2014                                                 | 3719   | 15852        | 0.2346        | [0.2280; 0.2413]        | 3.8%            | 0.9%            |
| Li RC-2006                                                 | 4839   | 10715        | 0.4516        | [0.4422; 0.4611]        | 2.6%            | 0.9%            |
| Wong KH-2004                                               | 176    | 934          | 0.1884        | [0.1638; 0.2150]        | 0.2%            | 0.9%            |
| Common effect model                                        |        | <b>73982</b> | <b>0.3352</b> | <b>[0.3318; 0.3386]</b> | <b>17.9%</b>    | --              |
| Random effects model                                       |        |              | <b>0.3581</b> | <b>[0.2627; 0.4596]</b> | --              | <b>24.4%</b>    |
| Heterogeneity: $I^2 = 100\%$ , $\tau^2 = 0.0745$ , $p = 0$ |        |              |               |                         |                 |                 |
| Studyperiod = 2006-2011                                    |        |              |               |                         |                 |                 |
| AYiGuLi-2010                                               | 13     | 151          | 0.0861        | [0.0466; 0.1427]        | 0.0%            | 0.9%            |
| Bao ZY-2013                                                | 28     | 180          | 0.1556        | [0.1059; 0.2169]        | 0.0%            | 0.9%            |
| Bi L-2008                                                  | 107    | 1001         | 0.1069        | [0.0884; 0.1277]        | 0.2%            | 0.9%            |
| Ning LF-2008                                               | 1086   | 3561         | 0.3050        | [0.2899; 0.3204]        | 0.9%            | 0.9%            |
| Cheng Y-2007                                               | 10     | 140          | 0.0714        | [0.0348; 0.1274]        | 0.0%            | 0.9%            |
| Du L-2013                                                  | 7      | 235          | 0.0298        | [0.0121; 0.0604]        | 0.1%            | 0.9%            |
| Fan LZ-2012                                                | 0      | 158          | 0.0000        | [0.0000; 0.0231]        | 0.0%            | 0.9%            |
| Gu HY-2013                                                 | 505    | 6258         | 0.0807        | [0.0741; 0.0877]        | 1.5%            | 0.9%            |
| Yao XF-2013                                                | 806    | 2012         | 0.4006        | [0.3791; 0.4224]        | 0.5%            | 0.9%            |
| Lu B-2008                                                  | 208    | 1060         | 0.1962        | [0.1727; 0.2214]        | 0.3%            | 0.9%            |
| Li MY-2008                                                 | 169    | 768          | 0.2201        | [0.1912; 0.2510]        | 0.2%            | 0.9%            |
| Lin CY-2009                                                | 403    | 4959         | 0.0813        | [0.0738; 0.0892]        | 1.2%            | 0.9%            |
| Liu K-2009                                                 | 111    | 939          | 0.1182        | [0.0983; 0.1406]        | 0.2%            | 0.9%            |
| Liu XG-2008                                                | 209    | 566          | 0.3693        | [0.3294; 0.4105]        | 0.1%            | 0.9%            |
| Lu B-2008                                                  | 373    | 828          | 0.4505        | [0.4162; 0.4851]        | 0.2%            | 0.9%            |
| Lu J-2009                                                  | 259    | 1977         | 0.1310        | [0.1164; 0.1467]        | 0.5%            | 0.9%            |
| Shao HW-2009                                               | 41     | 648          | 0.0633        | [0.0458; 0.0849]        | 0.2%            | 0.9%            |
| Wang RL-2012                                               | 509    | 2028         | 0.2510        | [0.2322; 0.2705]        | 0.5%            | 0.9%            |
| Xing XM-2011                                               | 185    | 812          | 0.2278        | [0.1994; 0.2583]        | 0.2%            | 0.9%            |
| Yang F-2012                                                | 893    | 3771         | 0.2368        | [0.2233; 0.2507]        | 0.9%            | 0.9%            |
| Yang B-2013                                                | 40     | 597          | 0.0670        | [0.0483; 0.0901]        | 0.1%            | 0.9%            |
| Yu DS-2011                                                 | 338    | 2429         | 0.1392        | [0.1256; 0.1536]        | 0.6%            | 0.9%            |
| Yu WX-2012                                                 | 138    | 5000         | 0.0276        | [0.0232; 0.0325]        | 1.2%            | 0.9%            |
| Zhang P-2015                                               | 47     | 1195         | 0.0393        | [0.0290; 0.0520]        | 0.3%            | 0.9%            |
| Zhao HL-2012                                               | 17     | 327          | 0.0520        | [0.0306; 0.0819]        | 0.1%            | 0.9%            |
| Zheng RD-2013                                              | 207    | 850          | 0.2435        | [0.2150; 0.2738]        | 0.2%            | 0.9%            |
| Zheng SJ-2015                                              | 55     | 205          | 0.2683        | [0.2090; 0.3345]        | 0.0%            | 0.9%            |
| Zhong CF-2011                                              | 1074   | 2627         | 0.4088        | [0.3900; 0.4279]        | 0.6%            | 0.9%            |
| Zhou HF-2006                                               | 47     | 175          | 0.2686        | [0.2045; 0.3407]        | 0.0%            | 0.9%            |
| Chang Y-2009                                               | 522    | 2572         | 0.2030        | [0.1876; 0.2190]        | 0.6%            | 0.9%            |
| Chiu DM-2013                                               | 129    | 450          | 0.2867        | [0.2453; 0.3309]        | 0.1%            | 0.9%            |
| Dong C-2012                                                | 2793   | 14208        | 0.1966        | [0.1901; 0.2032]        | 3.4%            | 0.9%            |
| Fu H-2010                                                  | 70     | 296          | 0.2365        | [0.1892; 0.2891]        | 0.1%            | 0.9%            |
| Shenyang G-2011                                            | 37     | 456          | 0.0811        | [0.0578; 0.1101]        | 0.1%            | 0.9%            |
| Gu G-2015                                                  | 57     | 994          | 0.0573        | [0.0437; 0.0737]        | 0.2%            | 0.9%            |
| Taniguchi M-2009                                           | 143    | 300          | 0.4767        | [0.4190; 0.5348]        | 0.1%            | 0.9%            |
| Li W-2011                                                  | 69     | 173          | 0.3988        | [0.3253; 0.4759]        | 0.0%            | 0.9%            |
| Lu J-2009                                                  | 1547   | 8762         | 0.1766        | [0.1686; 0.1847]        | 2.1%            | 0.9%            |
| Ma Z-2010                                                  | 407    | 2090         | 0.1947        | [0.1780; 0.2124]        | 0.5%            | 0.9%            |
| Xue Y-2013                                                 | 70     | 260          | 0.2692        | [0.2163; 0.3275]        | 0.1%            | 0.9%            |
| Yu Y-2009                                                  | 988    | 4508         | 0.2192        | [0.2072; 0.2315]        | 1.1%            | 0.9%            |
| Zhang W-2009                                               | 117    | 1476         | 0.0793        | [0.0660; 0.0942]        | 0.4%            | 0.9%            |
| Common effect model                                        |        | <b>82002</b> | <b>0.1686</b> | <b>[0.1661; 0.1712]</b> | <b>19.8%</b>    | --              |
| Random effects model                                       |        |              | <b>0.1718</b> | <b>[0.1348; 0.2122]</b> | --              | <b>37.8%</b>    |
| Heterogeneity: $I^2 = 99\%$ , $\tau^2 = 0.0282$ , $p = 0$  |        |              |               |                         |                 |                 |

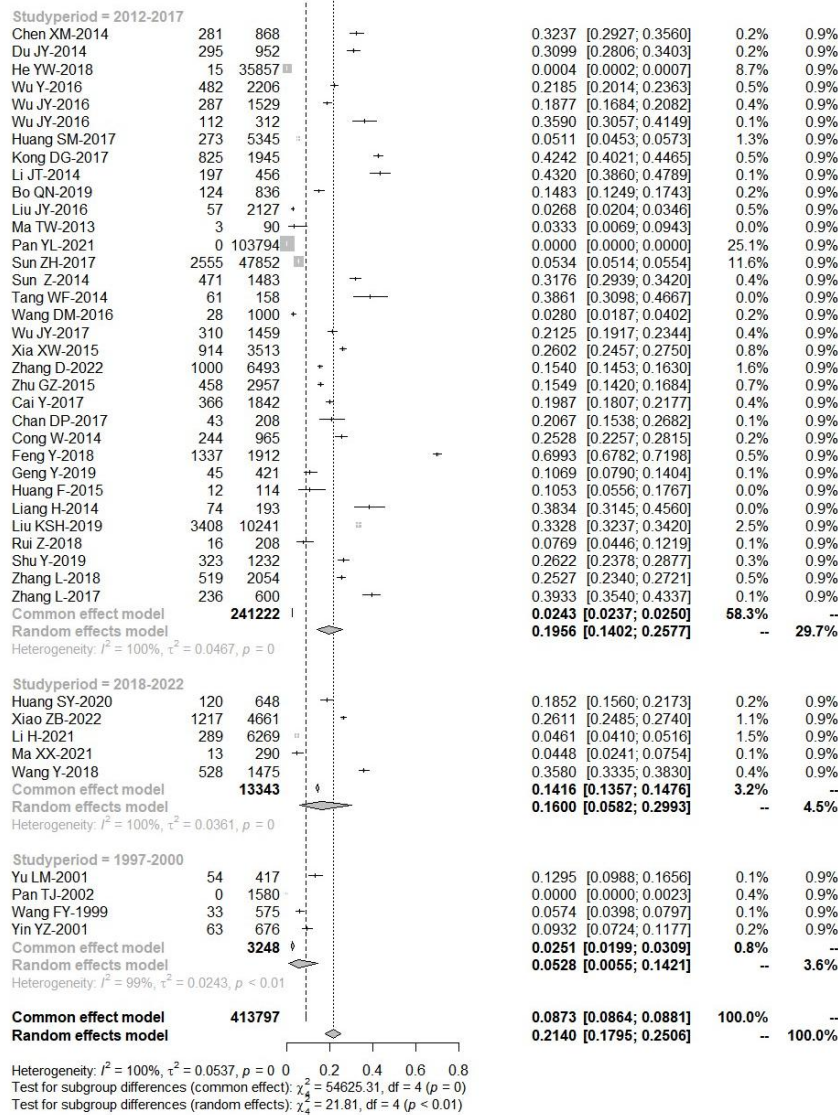

Figure S33. Forest plot of anti-HEV IgG prevalence in the general population in different study periods

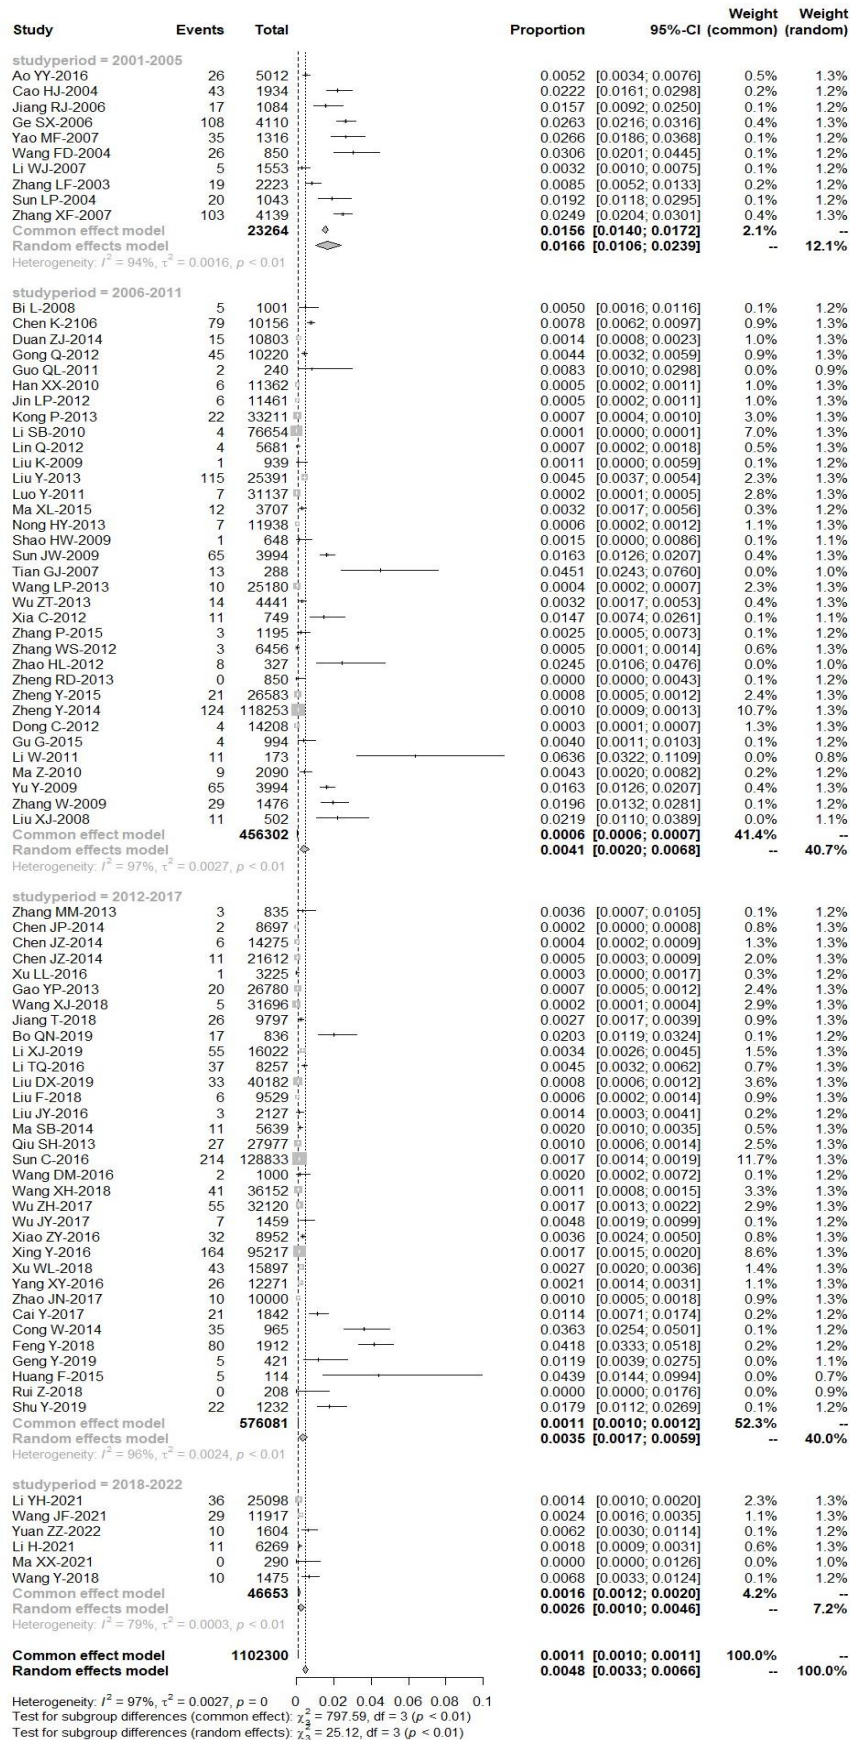

Figure S34. Forest plot of anti-HEV IgM prevalence in the general population in different study periods

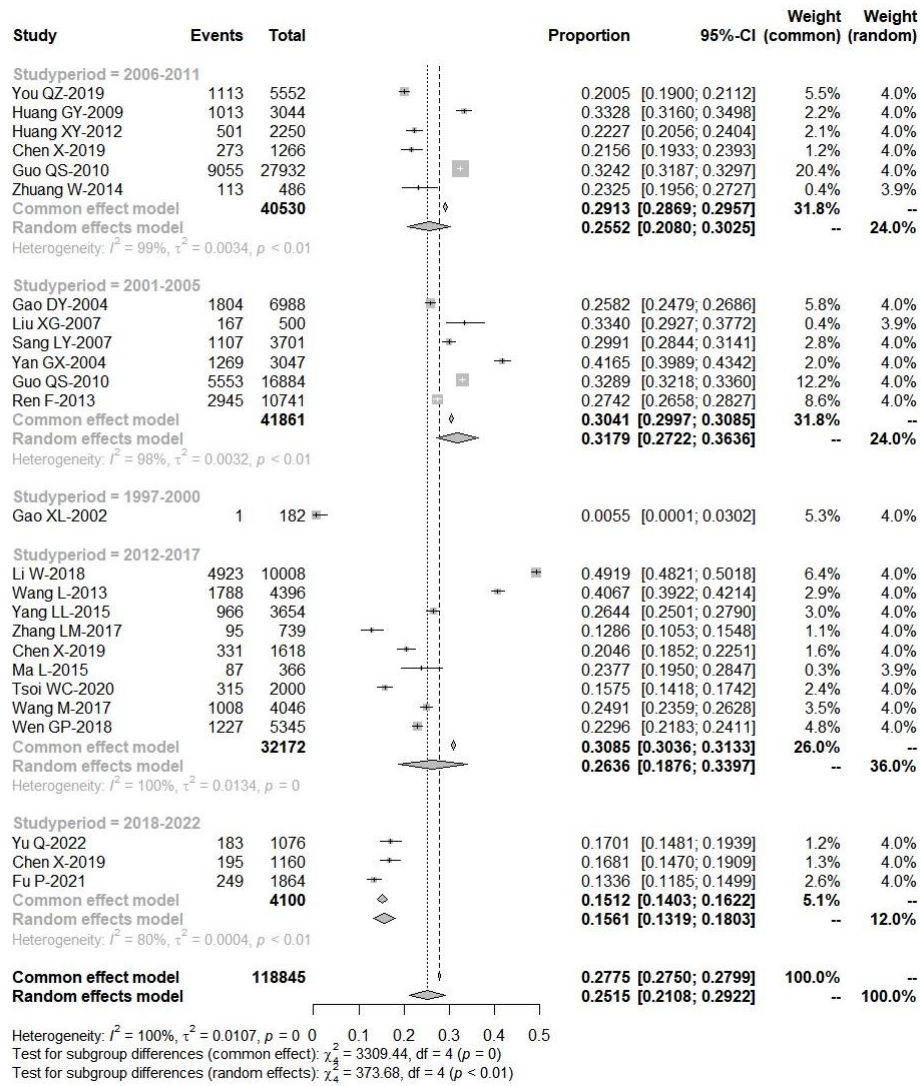

Figure S35. Forest plot of anti-HEV IgG prevalence in volunteer blood donors in different study periods

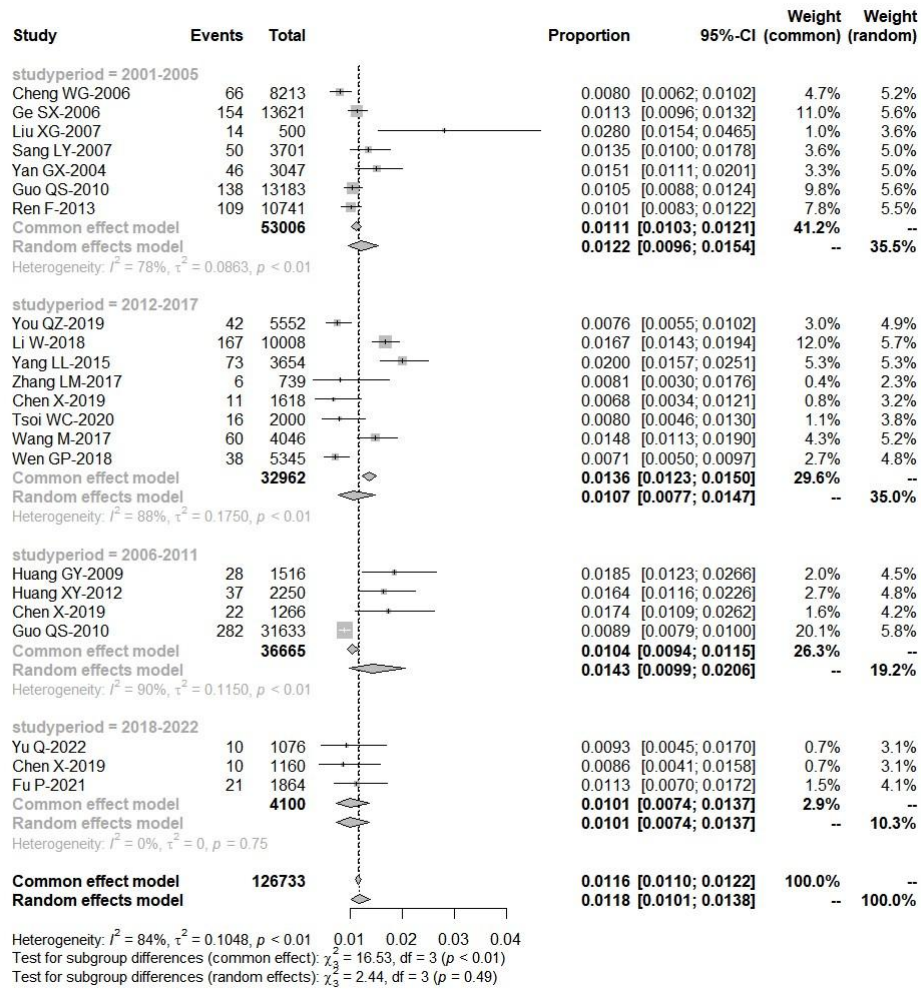

Figure S36. Forest plot of anti-HEV IgM prevalence in volunteer blood donors in different study periods



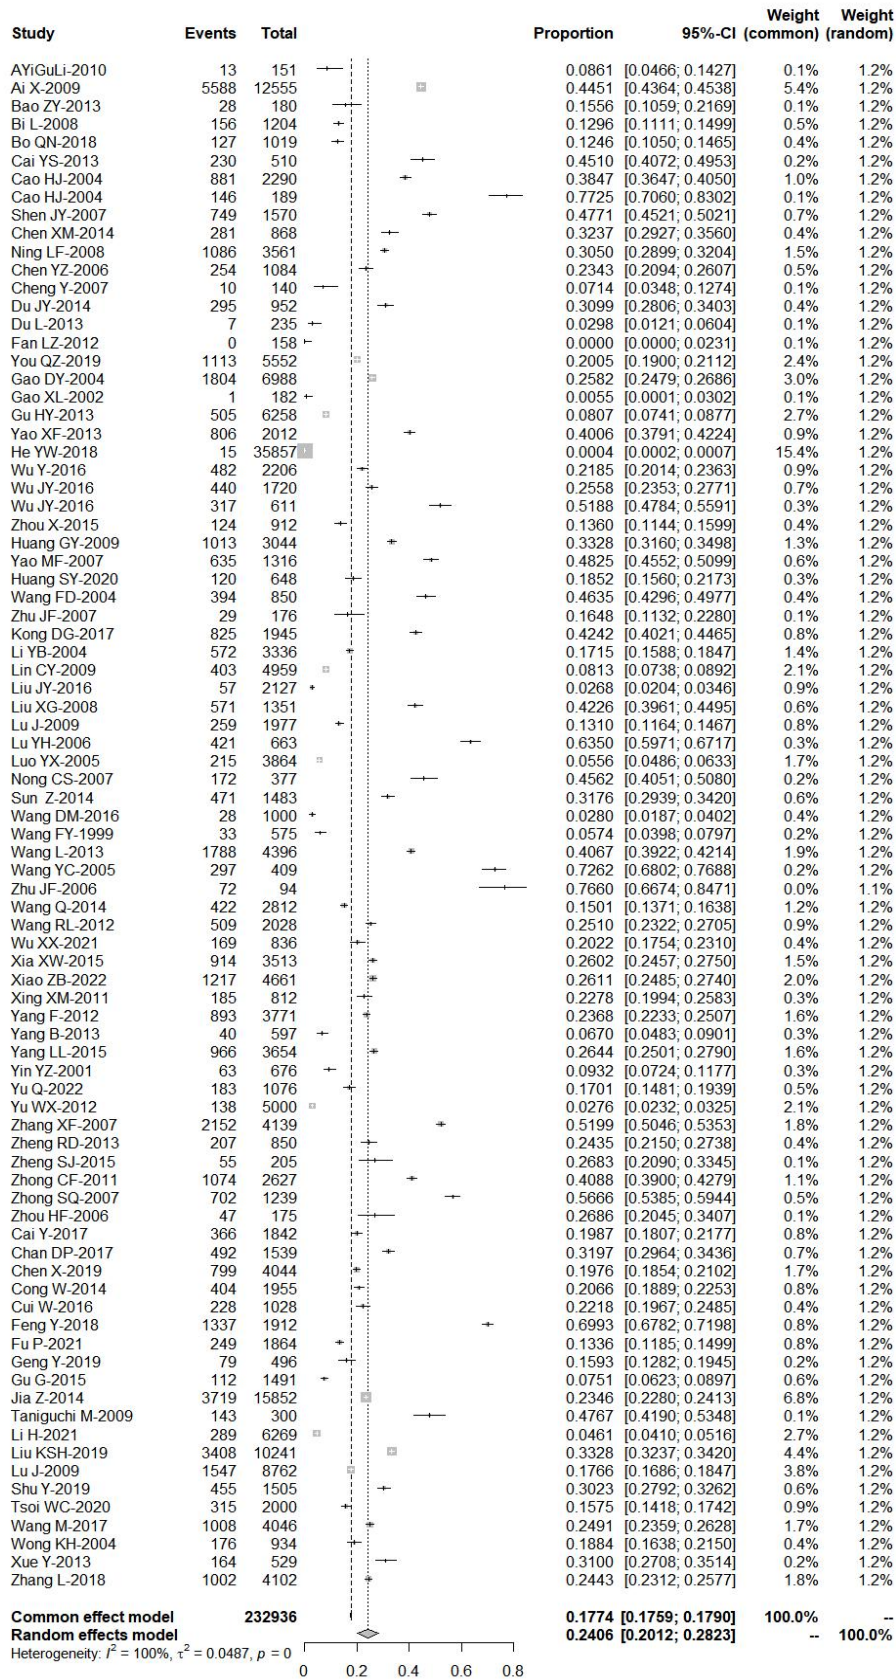

Figure S37. Sensitivity analysis of anti-HEV IgG positivity  
 (1) Studies with a JBI score  $\leq 5$  were excluded

| Study         | Events | Total  | Proportion | 95%-CI           | Weight (common) | Weight (random) |
|---------------|--------|--------|------------|------------------|-----------------|-----------------|
| Zhang ZX-2003 | 210    | 574    | 0.3659     | [0.3264; 0.4067] | 0.1%            | 0.7%            |
| Ai X-2009     | 5588   | 12555  | 0.4451     | [0.4364; 0.4538] | 2.1%            | 0.7%            |
| Bi L-2008     | 156    | 1204   | 0.1296     | [0.1111; 0.1499] | 0.2%            | 0.7%            |
| Bo QN-2018    | 127    | 1019   | 0.1246     | [0.1050; 0.1465] | 0.2%            | 0.7%            |
| Cai YS-2013   | 230    | 510    | 0.4510     | [0.4072; 0.4953] | 0.1%            | 0.7%            |
| Cao HJ-2004   | 881    | 2290   | 0.3847     | [0.3647; 0.4050] | 0.4%            | 0.7%            |
| Shen JY-2007  | 749    | 1570   | 0.4771     | [0.4521; 0.5021] | 0.3%            | 0.7%            |
| Chen XM-2014  | 281    | 868    | 0.3237     | [0.2927; 0.3560] | 0.1%            | 0.7%            |
| Ning LF-2008  | 1086   | 3561   | 0.3050     | [0.2899; 0.3204] | 0.6%            | 0.7%            |
| Chen YZ-2006  | 254    | 1084   | 0.2343     | [0.2094; 0.2607] | 0.2%            | 0.7%            |
| Du JY-2014    | 295    | 952    | 0.3099     | [0.2806; 0.3403] | 0.2%            | 0.7%            |
| Du L-2013     | 7      | 235    | 0.0298     | [0.0121; 0.0604] | 0.0%            | 0.7%            |
| You QZ-2019   | 1113   | 5552   | 0.2005     | [0.1900; 0.2112] | 0.9%            | 0.7%            |
| Gao DY-2004   | 1804   | 6988   | 0.2582     | [0.2479; 0.2686] | 1.2%            | 0.7%            |
| Gu HY-2013    | 505    | 6258   | 0.0807     | [0.0741; 0.0877] | 1.0%            | 0.7%            |
| Yao XF-2013   | 806    | 2012   | 0.4006     | [0.3791; 0.4224] | 0.3%            | 0.7%            |
| He YW-2018    | 15     | 35857  | 0.0004     | [0.0002; 0.0007] | 6.0%            | 0.7%            |
| Wu Y-2016     | 482    | 2206   | 0.2185     | [0.2014; 0.2363] | 0.4%            | 0.7%            |
| Wu JY-2016    | 440    | 1720   | 0.2558     | [0.2353; 0.2771] | 0.3%            | 0.7%            |
| Wu JY-2016    | 317    | 611    | 0.5188     | [0.4784; 0.5591] | 0.1%            | 0.7%            |
| Hu AQ-2010    | 377    | 2019   | 0.1867     | [0.1699; 0.2044] | 0.3%            | 0.7%            |
| Zhou X-2015   | 124    | 912    | 0.1360     | [0.1144; 0.1599] | 0.2%            | 0.7%            |
| Huang GY-2009 | 1013   | 3044   | 0.3328     | [0.3160; 0.3498] | 0.5%            | 0.7%            |
| Yao MF-2007   | 635    | 1316   | 0.4825     | [0.4552; 0.5099] | 0.2%            | 0.7%            |
| Huang SY-2020 | 120    | 648    | 0.1852     | [0.1560; 0.2173] | 0.1%            | 0.7%            |
| Huang SM-2017 | 273    | 5345   | 0.0511     | [0.0453; 0.0573] | 0.9%            | 0.7%            |
| Huang XY-2012 | 501    | 2250   | 0.2227     | [0.2056; 0.2404] | 0.4%            | 0.7%            |
| Meng ZH-2005  | 413    | 980    | 0.4214     | [0.3903; 0.4531] | 0.2%            | 0.7%            |
| Lu B-2008     | 208    | 1060   | 0.1962     | [0.1727; 0.2214] | 0.2%            | 0.7%            |
| Wang FD-2004  | 394    | 850    | 0.4635     | [0.4296; 0.4977] | 0.1%            | 0.7%            |
| Zheng YJ-2005 | 573    | 852    | 0.6725     | [0.6399; 0.7040] | 0.1%            | 0.7%            |
| Kong DG-2017  | 825    | 1945   | 0.4242     | [0.4021; 0.4465] | 0.3%            | 0.7%            |
| Li JT-2014    | 197    | 456    | 0.4320     | [0.3860; 0.4789] | 0.1%            | 0.7%            |
| Bo QN-2019    | 259    | 1700   | 0.1524     | [0.1356; 0.1703] | 0.3%            | 0.7%            |
| Li MY-2008    | 169    | 768    | 0.2201     | [0.1912; 0.2510] | 0.1%            | 0.7%            |
| Li WJ-2007    | 337    | 1553   | 0.2170     | [0.1967; 0.2383] | 0.3%            | 0.7%            |
| Li W-2018     | 4923   | 10008  | 0.4919     | [0.4821; 0.5018] | 1.7%            | 0.7%            |
| Li YB-2004    | 572    | 3336   | 0.1715     | [0.1588; 0.1847] | 0.6%            | 0.7%            |
| Wang HR-2007  | 1089   | 3931   | 0.2770     | [0.2631; 0.2913] | 0.7%            | 0.7%            |
| Lin CY-2009   | 403    | 4959   | 0.0813     | [0.0738; 0.0892] | 0.8%            | 0.7%            |
| Liu JY-2016   | 57     | 2127   | 0.0268     | [0.0204; 0.0346] | 0.4%            | 0.7%            |
| Liu K-2009    | 223    | 1365   | 0.1634     | [0.1441; 0.1841] | 0.2%            | 0.7%            |
| Liu XG-2007   | 610    | 1585   | 0.3849     | [0.3608; 0.4093] | 0.3%            | 0.7%            |
| Liu XG-2008   | 571    | 1351   | 0.4226     | [0.3961; 0.4495] | 0.2%            | 0.7%            |
| Yu LM-2001    | 54     | 417    | 0.1295     | [0.0988; 0.1656] | 0.1%            | 0.7%            |
| Lu B-2008     | 373    | 828    | 0.4505     | [0.4162; 0.4851] | 0.1%            | 0.7%            |
| Lu J-2009     | 259    | 1977   | 0.1310     | [0.1164; 0.1467] | 0.3%            | 0.7%            |
| Lu YH-2006    | 421    | 663    | 0.6350     | [0.5971; 0.6717] | 0.1%            | 0.7%            |
| Luo YX-2005   | 215    | 3864   | 0.0556     | [0.0486; 0.0633] | 0.6%            | 0.7%            |
| Ma TW-2013    | 30     | 324    | 0.0926     | [0.0633; 0.1295] | 0.1%            | 0.7%            |
| Nong CS-2007  | 172    | 377    | 0.4562     | [0.4051; 0.5080] | 0.1%            | 0.7%            |
| Pan TJ-2002   | 0      | 1580   | 0.0000     | [0.0000; 0.0023] | 0.3%            | 0.7%            |
| Pan YL-2021   | 0      | 103794 | 0.0000     | [0.0000; 0.0000] | 17.3%           | 0.7%            |
| Pu MH-2008    | 408    | 1360   | 0.3000     | [0.2757; 0.3251] | 0.2%            | 0.7%            |
| Sang LY-2007  | 1107   | 3701   | 0.2991     | [0.2844; 0.3141] | 0.6%            | 0.7%            |
| Shao HW-2009  | 79     | 830    | 0.0952     | [0.0761; 0.1172] | 0.1%            | 0.7%            |
| Shao JS-2006  | 2565   | 14020  | 0.1830     | [0.1766; 0.1895] | 2.3%            | 0.7%            |
| Sun ZH-2017   | 2555   | 47852  | 0.0534     | [0.0514; 0.0554] | 8.0%            | 0.7%            |
| Sun Z-2014    | 471    | 1483   | 0.3176     | [0.2939; 0.3420] | 0.2%            | 0.7%            |
| Tang WF-2014  | 139    | 303    | 0.4587     | [0.4016; 0.5167] | 0.1%            | 0.7%            |
| Tian JS-2007  | 35     | 778    | 0.0450     | [0.0315; 0.0620] | 0.1%            | 0.7%            |
| Wang DM-2016  | 28     | 1000   | 0.0280     | [0.0187; 0.0402] | 0.2%            | 0.7%            |
| Wang FY-1999  | 33     | 575    | 0.0574     | [0.0398; 0.0797] | 0.1%            | 0.7%            |
| Wang L-2013   | 1788   | 4396   | 0.4067     | [0.3922; 0.4214] | 0.7%            | 0.7%            |
| Wang YC-2005  | 297    | 409    | 0.7262     | [0.6802; 0.7688] | 0.1%            | 0.7%            |
| Wang Q-2014   | 422    | 2812   | 0.1501     | [0.1371; 0.1638] | 0.5%            | 0.7%            |
| Wang ZZ-2007  | 1105   | 1234   | 0.8955     | [0.8770; 0.9120] | 0.2%            | 0.7%            |
| Wang RL-2012  | 509    | 2028   | 0.2510     | [0.2322; 0.2705] | 0.3%            | 0.7%            |
| Wu XX-2021    | 169    | 836    | 0.2022     | [0.1754; 0.2310] | 0.1%            | 0.7%            |
| Wu JY-2017    | 310    | 1459   | 0.2125     | [0.1917; 0.2344] | 0.2%            | 0.7%            |
| Xia XW-2015   | 914    | 3513   | 0.2602     | [0.2457; 0.2750] | 0.6%            | 0.7%            |
| Xiao ZB-2022  | 1217   | 4661   | 0.2611     | [0.2485; 0.2740] | 0.8%            | 0.7%            |
| Xie SF-2014   | 1019   | 2614   | 0.3898     | [0.3711; 0.4088] | 0.4%            | 0.7%            |
| Xing XM-2011  | 185    | 812    | 0.2278     | [0.1994; 0.2583] | 0.1%            | 0.7%            |
| Xu PN-2014    | 91     | 415    | 0.2193     | [0.1804; 0.2622] | 0.1%            | 0.7%            |
| Yan GX-2004   | 1269   | 3047   | 0.4165     | [0.3989; 0.4342] | 0.5%            | 0.7%            |
| Yang F-2012   | 893    | 3771   | 0.2368     | [0.2233; 0.2507] | 0.6%            | 0.7%            |
| Yang B-2013   | 40     | 597    | 0.0670     | [0.0483; 0.0901] | 0.1%            | 0.7%            |
| Yang LL-2015  | 966    | 3654   | 0.2644     | [0.2501; 0.2790] | 0.6%            | 0.7%            |
| Yin YZ-2001   | 63     | 676    | 0.0932     | [0.0724; 0.1177] | 0.1%            | 0.7%            |
| Yu DS-2011    | 338    | 2429   | 0.1392     | [0.1256; 0.1536] | 0.4%            | 0.7%            |
| Yu Q-2022     | 183    | 1076   | 0.1701     | [0.1481; 0.1939] | 0.2%            | 0.7%            |
| Yu WX-2012    | 138    | 5000   | 0.0276     | [0.0232; 0.0325] | 0.8%            | 0.7%            |
| Zhang D-2022  | 1000   | 6493   | 0.1540     | [0.1453; 0.1630] | 1.1%            | 0.7%            |
| Zhang LM-2017 | 95     | 739    | 0.1286     | [0.1053; 0.1548] | 0.1%            | 0.7%            |
| Zhang P-2015  | 47     | 1195   | 0.0393     | [0.0290; 0.0520] | 0.2%            | 0.7%            |
| Zhang XF-2007 | 2152   | 4139   | 0.5199     | [0.5046; 0.5353] | 0.7%            | 0.7%            |
| Zhao HL-2012  | 17     | 327    | 0.0520     | [0.0306; 0.0819] | 0.1%            | 0.7%            |
| Zheng RD-2013 | 207    | 850    | 0.2435     | [0.2150; 0.2738] | 0.1%            | 0.7%            |
| Zheng SJ-2015 | 55     | 205    | 0.2683     | [0.2090; 0.3345] | 0.0%            | 0.7%            |
| Zhong CF-2011 | 1074   | 2627   | 0.4088     | [0.3900; 0.4279] | 0.4%            | 0.7%            |
| Zhong SQ-2007 | 702    | 1239   | 0.5666     | [0.5385; 0.5944] | 0.2%            | 0.7%            |
| Zhu GZ-2015   | 690    | 3305   | 0.2088     | [0.1950; 0.2230] | 0.6%            | 0.7%            |



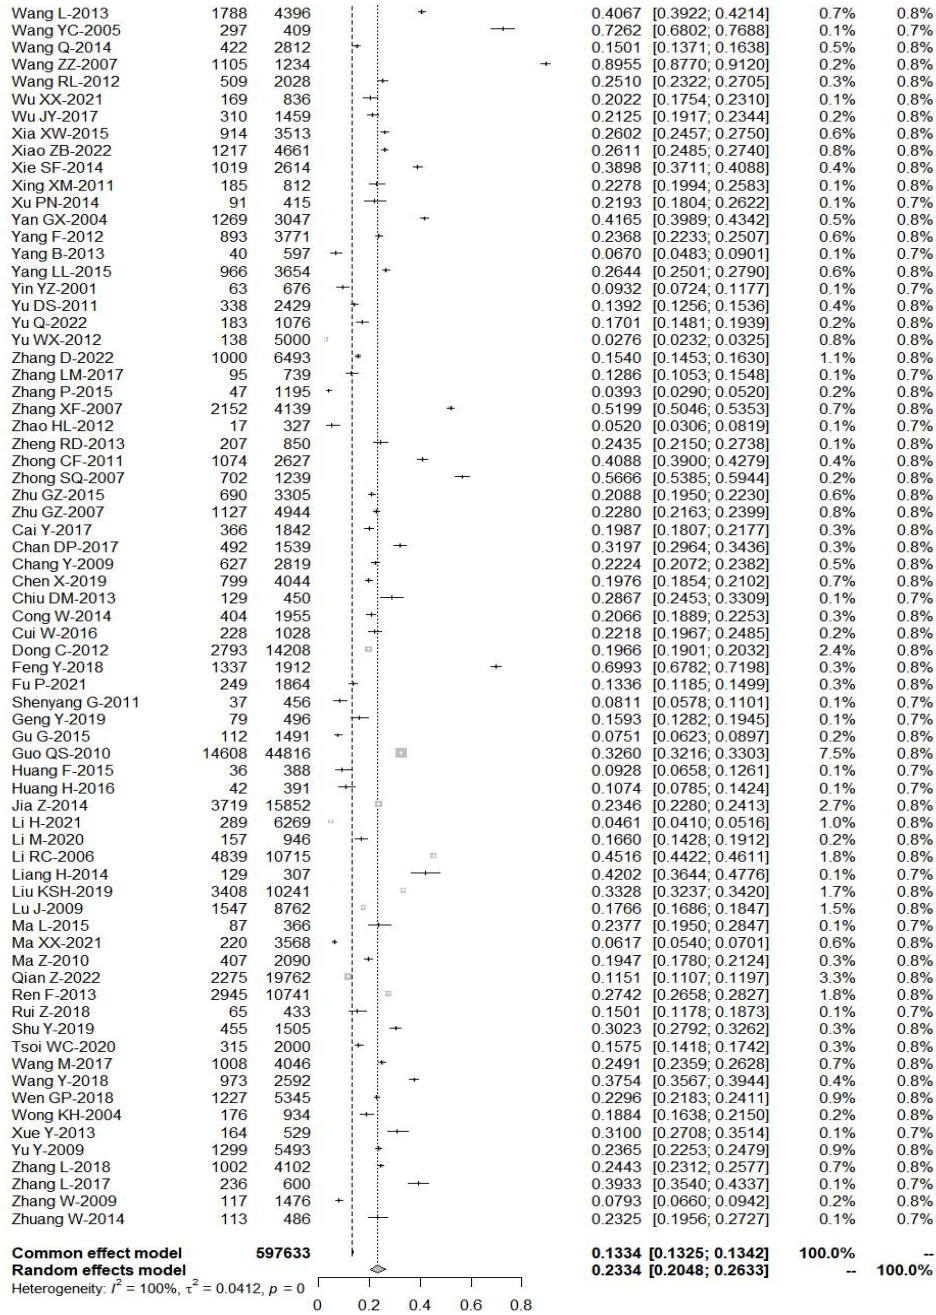

### (3) Studies with sample sizes $\leq 300$ were excluded

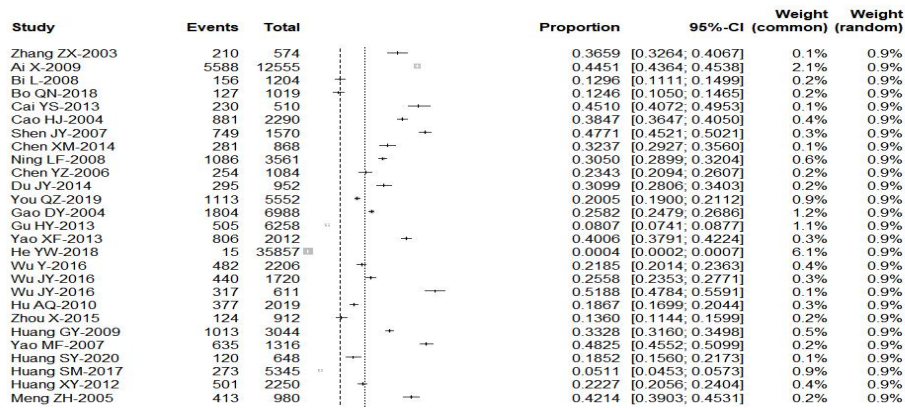

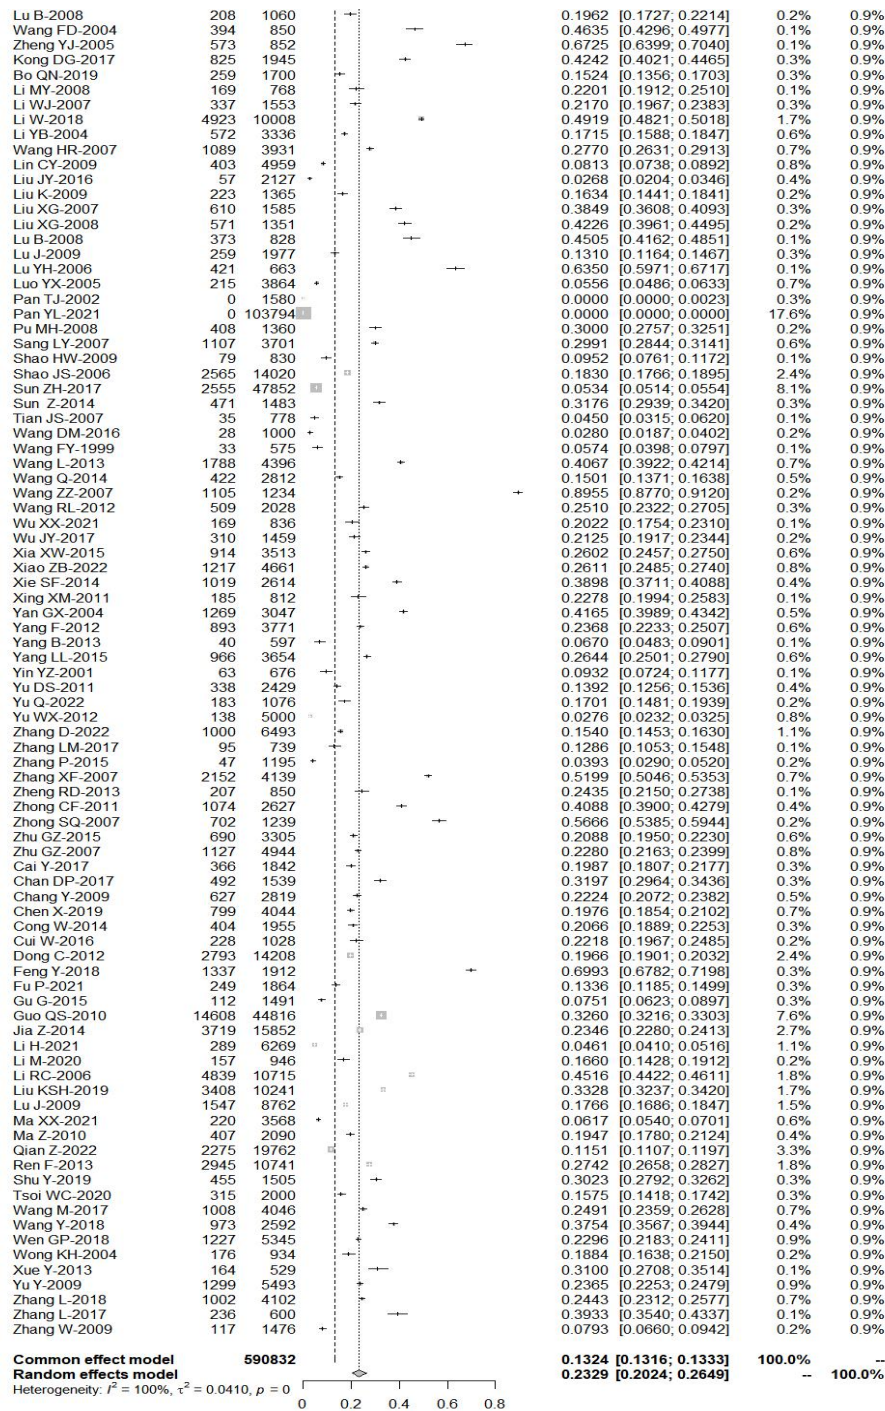

(4) Studies with sample sizes  $\leq 500$  were excluded

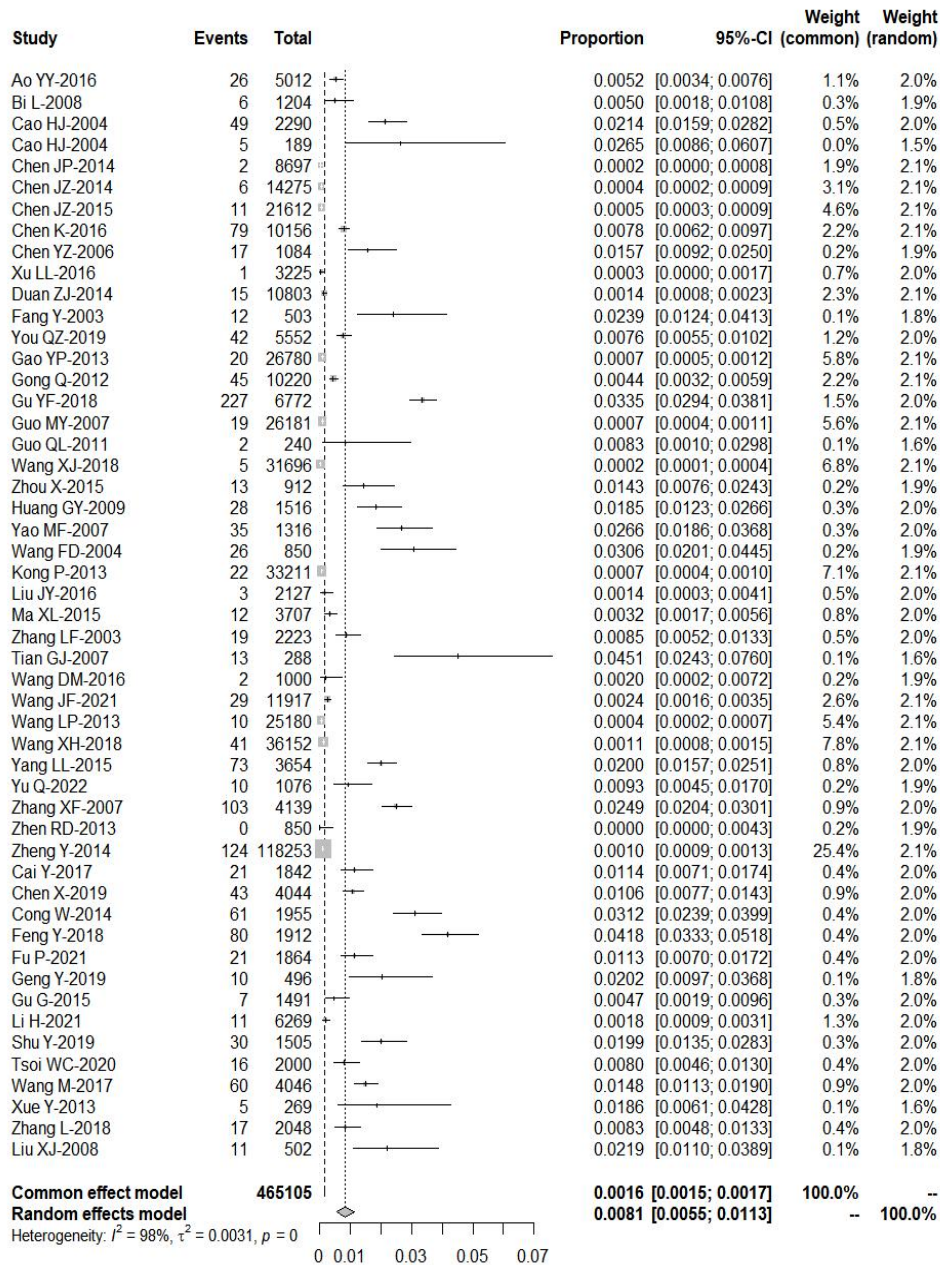

Figure S38. Sensitivity analysis of anti-HEV IgM positivity  
 (1) Studies with a JBI score  $\leq 5$  were excluded

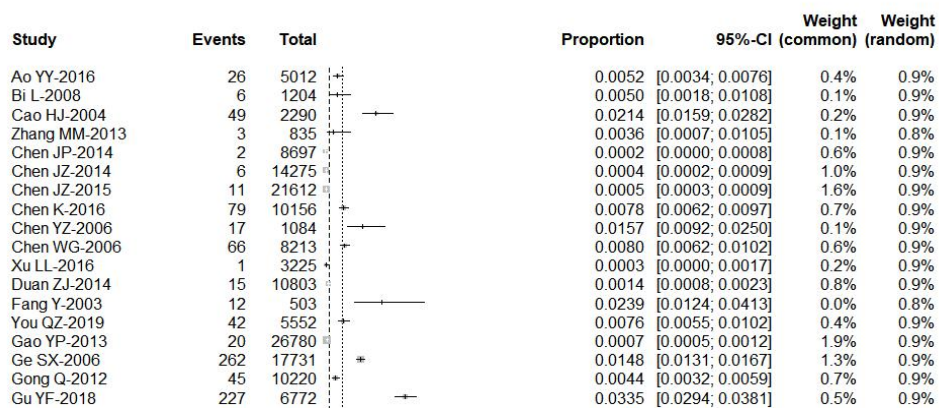

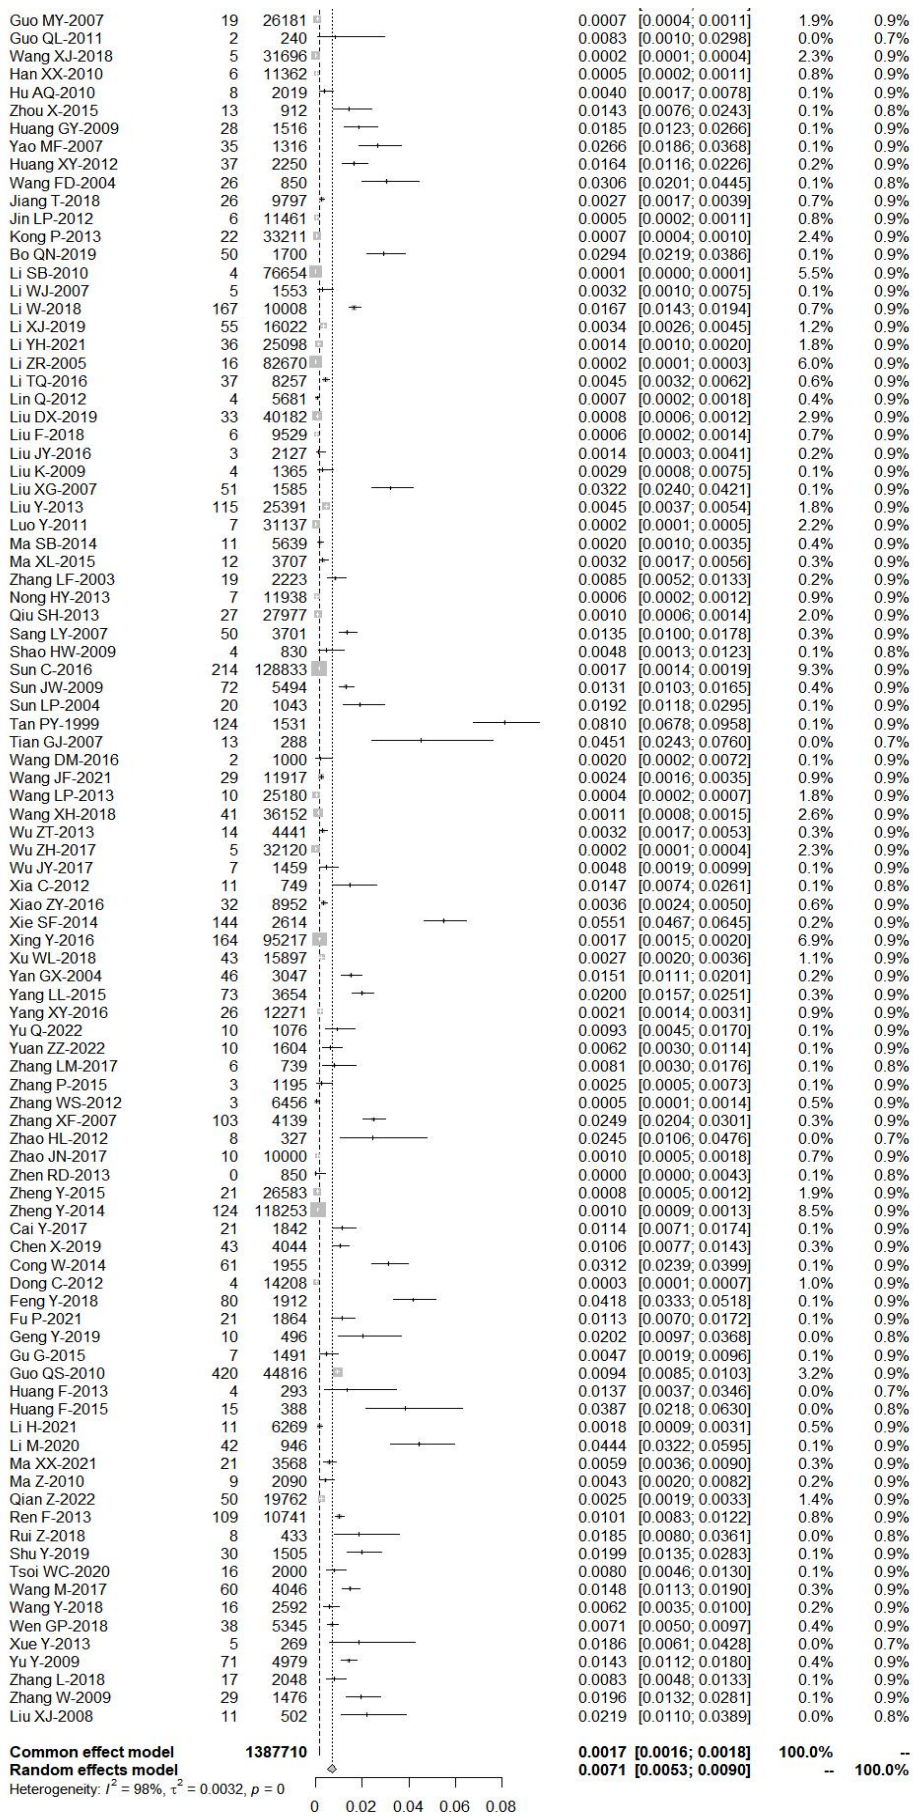

(2) Studies with sample sizes  $\leq 200$  were excluded

| Study         | Events | Total  | Proportion | 95%-CI (common)  | Weight (random) | Weight (common) |
|---------------|--------|--------|------------|------------------|-----------------|-----------------|
| Ao YY-2016    | 26     | 5012   | 0.0052     | [0.0034; 0.0076] | 0.4%            | 0.9%            |
| Bi L-2008     | 6      | 1204   | 0.0050     | [0.0018; 0.0108] | 0.1%            | 0.9%            |
| Cao HJ-2004   | 49     | 2290   | 0.0214     | [0.0159; 0.0282] | 0.2%            | 0.9%            |
| Zhang MM-2013 | 3      | 835    | 0.0036     | [0.0007; 0.0105] | 0.1%            | 0.9%            |
| Chen JP-2014  | 2      | 8697   | 0.0002     | [0.0000; 0.0008] | 0.6%            | 0.9%            |
| Chen JZ-2014  | 6      | 14275  | 0.0004     | [0.0002; 0.0009] | 1.0%            | 0.9%            |
| Chen JZ-2015  | 11     | 21612  | 0.0005     | [0.0003; 0.0009] | 1.6%            | 0.9%            |
| Chen K-2016   | 79     | 10156  | 0.0078     | [0.0062; 0.0097] | 0.7%            | 0.9%            |
| Chen YZ-2006  | 17     | 1084   | 0.0157     | [0.0092; 0.0250] | 0.1%            | 0.9%            |
| Chen WG-2006  | 66     | 8213   | 0.0080     | [0.0062; 0.0102] | 0.6%            | 0.9%            |
| Xu LL-2016    | 1      | 3225   | 0.0003     | [0.0000; 0.0017] | 0.2%            | 0.9%            |
| Duan ZJ-2014  | 15     | 10803  | 0.0014     | [0.0008; 0.0023] | 0.8%            | 0.9%            |
| Fang Y-2003   | 12     | 503    | 0.0239     | [0.0124; 0.0413] | 0.0%            | 0.8%            |
| You QZ-2019   | 42     | 5552   | 0.0076     | [0.0055; 0.0102] | 0.4%            | 0.9%            |
| Gao YP-2013   | 20     | 26780  | 0.0007     | [0.0005; 0.0012] | 1.9%            | 0.9%            |
| Ge SX-2006    | 262    | 17731  | 0.0148     | [0.0131; 0.0167] | 1.3%            | 0.9%            |
| Gong Q-2012   | 45     | 10220  | 0.0044     | [0.0032; 0.0059] | 0.7%            | 0.9%            |
| Gu YF-2018    | 227    | 6772   | 0.0335     | [0.0294; 0.0381] | 0.5%            | 0.9%            |
| Guo MY-2007   | 19     | 26181  | 0.0007     | [0.0004; 0.0011] | 1.9%            | 0.9%            |
| Wang XJ-2018  | 5      | 31696  | 0.0002     | [0.0001; 0.0004] | 2.3%            | 0.9%            |
| Han XX-2010   | 6      | 11362  | 0.0005     | [0.0002; 0.0011] | 0.8%            | 0.9%            |
| Hu AQ-2010    | 8      | 2019   | 0.0040     | [0.0017; 0.0078] | 0.1%            | 0.9%            |
| Zhou X-2015   | 13     | 912    | 0.0143     | [0.0076; 0.0243] | 0.1%            | 0.9%            |
| Huang GY-2009 | 28     | 1516   | 0.0185     | [0.0123; 0.0266] | 0.1%            | 0.9%            |
| Yao MF-2007   | 35     | 1316   | 0.0266     | [0.0186; 0.0368] | 0.1%            | 0.9%            |
| Huang XY-2012 | 37     | 2250   | 0.0164     | [0.0116; 0.0226] | 0.2%            | 0.9%            |
| Wang FD-2004  | 26     | 850    | 0.0306     | [0.0201; 0.0445] | 0.1%            | 0.9%            |
| Jiang T-2018  | 26     | 9797   | 0.0027     | [0.0017; 0.0039] | 0.7%            | 0.9%            |
| Jin LP-2012   | 6      | 11461  | 0.0005     | [0.0002; 0.0011] | 0.8%            | 0.9%            |
| Kong P-2013   | 22     | 33211  | 0.0007     | [0.0004; 0.0010] | 2.4%            | 0.9%            |
| Bo QN-2019    | 50     | 1700   | 0.0294     | [0.0219; 0.0386] | 0.1%            | 0.9%            |
| Li SB-2010    | 4      | 76654  | 0.0001     | [0.0000; 0.0001] | 5.5%            | 0.9%            |
| Li WJ-2007    | 5      | 1553   | 0.0032     | [0.0010; 0.0075] | 0.1%            | 0.9%            |
| Li W-2018     | 167    | 10008  | 0.0167     | [0.0143; 0.0194] | 0.7%            | 0.9%            |
| Li XJ-2019    | 55     | 16022  | 0.0034     | [0.0026; 0.0045] | 1.2%            | 0.9%            |
| Li YH-2021    | 36     | 25098  | 0.0014     | [0.0010; 0.0020] | 1.8%            | 0.9%            |
| Li ZR-2005    | 16     | 82670  | 0.0002     | [0.0001; 0.0003] | 6.0%            | 0.9%            |
| Li TQ-2016    | 37     | 8257   | 0.0045     | [0.0032; 0.0062] | 0.6%            | 0.9%            |
| Lin Q-2012    | 4      | 5681   | 0.0007     | [0.0002; 0.0018] | 0.4%            | 0.9%            |
| Liu DX-2019   | 33     | 40182  | 0.0008     | [0.0006; 0.0012] | 2.9%            | 0.9%            |
| Liu F-2018    | 6      | 9529   | 0.0006     | [0.0002; 0.0014] | 0.7%            | 0.9%            |
| Liu JY-2016   | 3      | 2127   | 0.0014     | [0.0003; 0.0041] | 0.2%            | 0.9%            |
| Liu K-2009    | 4      | 1365   | 0.0029     | [0.0008; 0.0075] | 0.1%            | 0.9%            |
| Liu XG-2007   | 51     | 1585   | 0.0322     | [0.0240; 0.0421] | 0.1%            | 0.9%            |
| Liu Y-2013    | 115    | 25391  | 0.0045     | [0.0037; 0.0054] | 1.8%            | 0.9%            |
| Luo Y-2011    | 7      | 31137  | 0.0002     | [0.0001; 0.0005] | 2.2%            | 0.9%            |
| Ma SB-2014    | 11     | 5639   | 0.0020     | [0.0010; 0.0035] | 0.4%            | 0.9%            |
| Ma XL-2015    | 12     | 3707   | 0.0032     | [0.0017; 0.0056] | 0.3%            | 0.9%            |
| Zhang LF-2003 | 19     | 2223   | 0.0085     | [0.0052; 0.0133] | 0.2%            | 0.9%            |
| Nong HY-2013  | 7      | 11938  | 0.0006     | [0.0002; 0.0012] | 0.9%            | 0.9%            |
| Qiu SH-2013   | 27     | 27977  | 0.0010     | [0.0006; 0.0014] | 2.0%            | 0.9%            |
| Sang LY-2007  | 50     | 3701   | 0.0135     | [0.0100; 0.0178] | 0.3%            | 0.9%            |
| Shao HW-2009  | 4      | 830    | 0.0048     | [0.0013; 0.0123] | 0.1%            | 0.9%            |
| Sun C-2016    | 214    | 128833 | 0.0017     | [0.0014; 0.0019] | 9.3%            | 0.9%            |
| Sun JW-2009   | 72     | 5494   | 0.0131     | [0.0103; 0.0165] | 0.4%            | 0.9%            |
| Sun LP-2004   | 20     | 1043   | 0.0192     | [0.0118; 0.0295] | 0.1%            | 0.9%            |
| Tan PY-1999   | 124    | 1531   | 0.0810     | [0.0678; 0.0958] | 0.1%            | 0.9%            |
| Wang DM-2016  | 2      | 1000   | 0.0020     | [0.0002; 0.0072] | 0.1%            | 0.9%            |
| Wang JF-2021  | 29     | 11917  | 0.0024     | [0.0016; 0.0035] | 0.9%            | 0.9%            |
| Wang LP-2013  | 10     | 25180  | 0.0004     | [0.0002; 0.0007] | 1.8%            | 0.9%            |
| Wang XH-2018  | 41     | 36152  | 0.0011     | [0.0008; 0.0015] | 2.6%            | 0.9%            |
| Wu ZT-2013    | 14     | 4441   | 0.0032     | [0.0017; 0.0053] | 0.3%            | 0.9%            |
| Wu ZH-2017    | 5      | 32120  | 0.0002     | [0.0001; 0.0004] | 2.3%            | 0.9%            |
| Wu JY-2017    | 7      | 1459   | 0.0048     | [0.0019; 0.0099] | 0.1%            | 0.9%            |
| Xia C-2012    | 11     | 749    | 0.0147     | [0.0074; 0.0261] | 0.1%            | 0.9%            |
| Xiao ZY-2016  | 32     | 8952   | 0.0036     | [0.0024; 0.0050] | 0.6%            | 0.9%            |
| Xie SF-2014   | 144    | 2614   | 0.0551     | [0.0467; 0.0645] | 0.2%            | 0.9%            |
| Xing Y-2016   | 164    | 95217  | 0.0017     | [0.0015; 0.0020] | 6.9%            | 0.9%            |
| Xu WL-2018    | 43     | 15897  | 0.0027     | [0.0020; 0.0036] | 1.1%            | 0.9%            |
| Yan GX-2004   | 46     | 3047   | 0.0151     | [0.0111; 0.0201] | 0.2%            | 0.9%            |
| Yang LL-2015  | 73     | 3654   | 0.0200     | [0.0157; 0.0251] | 0.3%            | 0.9%            |
| Yang XY-2016  | 26     | 12271  | 0.0021     | [0.0014; 0.0031] | 0.9%            | 0.9%            |
| Yu Q-2022     | 10     | 1076   | 0.0093     | [0.0045; 0.0170] | 0.1%            | 0.9%            |
| Yuan ZZ-2022  | 10     | 1604   | 0.0062     | [0.0030; 0.0114] | 0.1%            | 0.9%            |
| Zhang LM-2017 | 6      | 739    | 0.0081     | [0.0030; 0.0176] | 0.1%            | 0.9%            |
| Zhang P-2015  | 3      | 1195   | 0.0025     | [0.0005; 0.0073] | 0.1%            | 0.9%            |
| Zhang WS-2012 | 3      | 6456   | 0.0005     | [0.0001; 0.0014] | 0.5%            | 0.9%            |
| Zhang XF-2007 | 103    | 4139   | 0.0249     | [0.0204; 0.0301] | 0.3%            | 0.9%            |
| Zhao HL-2012  | 8      | 327    | 0.0245     | [0.0106; 0.0476] | 0.0%            | 0.8%            |
| Zhao JN-2017  | 10     | 10000  | 0.0010     | [0.0005; 0.0018] | 0.7%            | 0.9%            |
| Zhen RD-2013  | 0      | 850    | 0.0000     | [0.0000; 0.0043] | 0.1%            | 0.9%            |
| Zheng Y-2015  | 21     | 26583  | 0.0008     | [0.0005; 0.0012] | 1.9%            | 0.9%            |
| Zheng Y-2014  | 124    | 118253 | 0.0010     | [0.0009; 0.0013] | 8.5%            | 0.9%            |
| Cai Y-2017    | 21     | 1842   | 0.0114     | [0.0071; 0.0174] | 0.1%            | 0.9%            |
| Chen X-2019   | 43     | 4044   | 0.0106     | [0.0077; 0.0143] | 0.3%            | 0.9%            |
| Cong W-2014   | 61     | 1955   | 0.0312     | [0.0239; 0.0399] | 0.1%            | 0.9%            |
| Dong C-2012   | 4      | 14208  | 0.0003     | [0.0001; 0.0007] | 1.0%            | 0.9%            |
| Feng Y-2018   | 80     | 1912   | 0.0418     | [0.0333; 0.0518] | 0.1%            | 0.9%            |



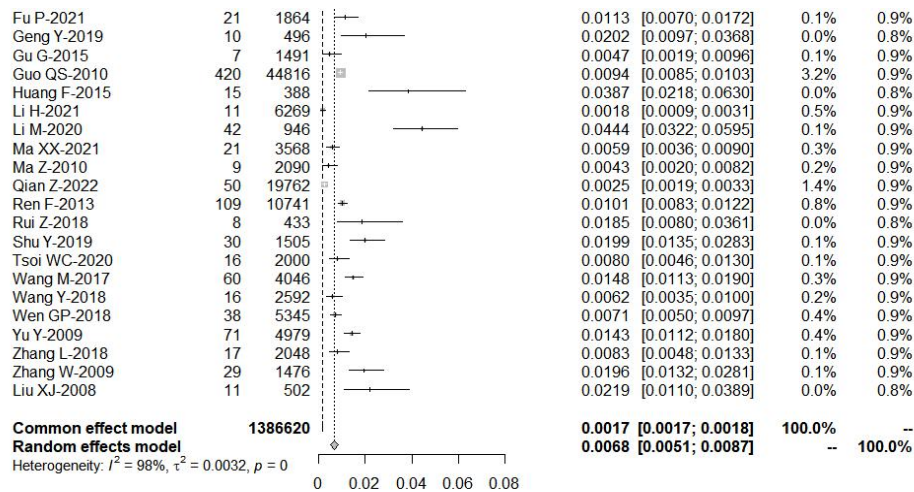

(3) Studies with sample sizes  $\leq 300$  were excluded

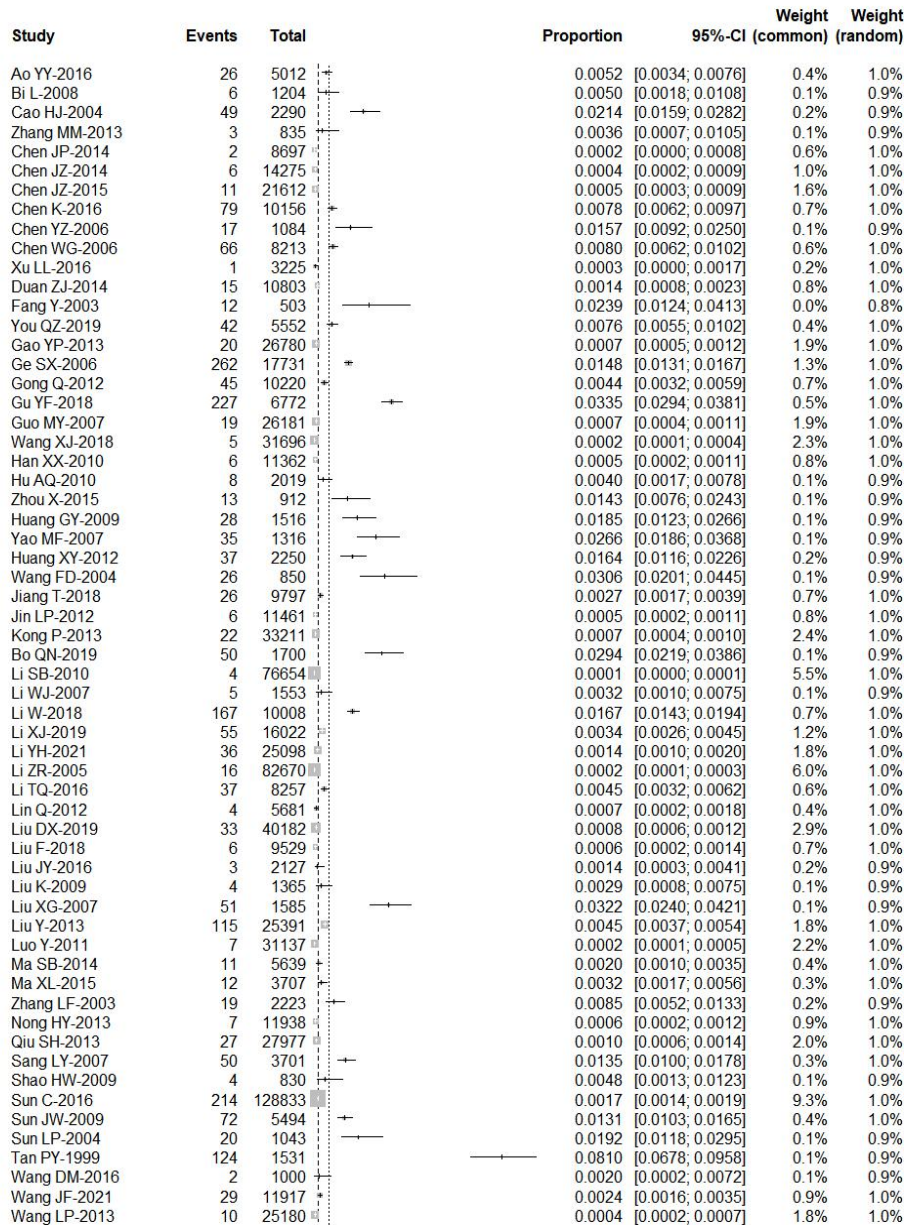

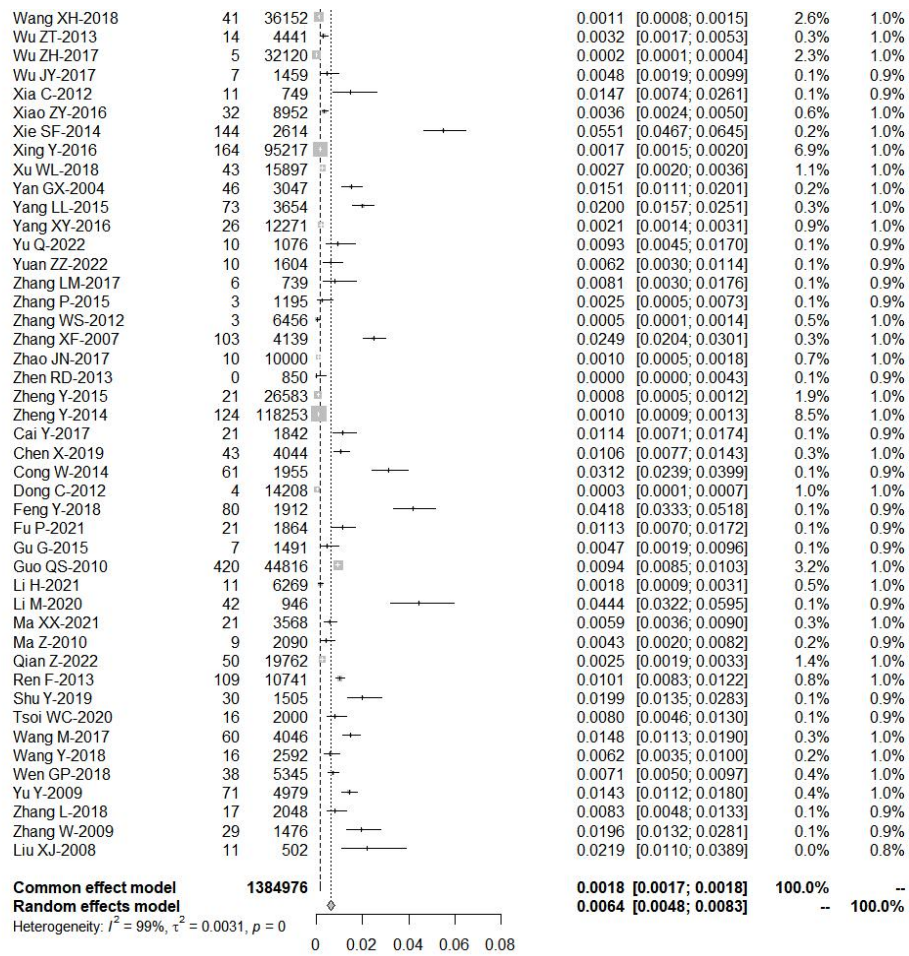

(4) Studies with sample sizes  $\leq 500$  were excluded

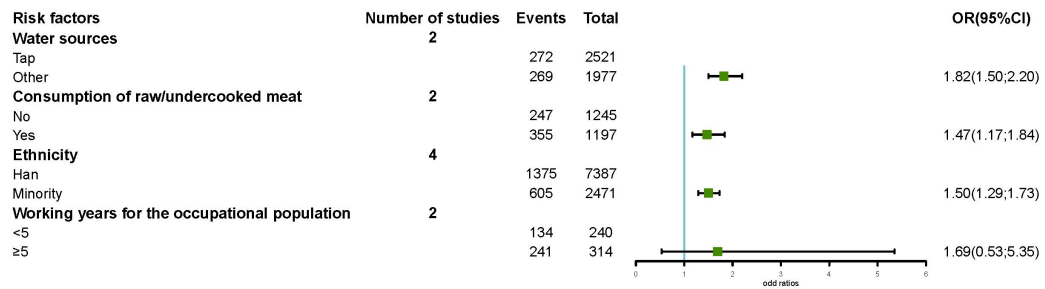

Figure 39. risk factors of anti-HEV IgG positive rate

## 1.2 Supplementary Tables

Table S1. Score of studies evaluated by JBI Critical Appraisal Tools

1. Was the sample frame appropriate to address the target population?
2. Were study participants sampled in an appropriate way?
3. Was the sample size adequate?
4. Were the study subjects and the setting described in detail?
5. Was the data analysis conducted with sufficient coverage of the identified sample?
6. Were valid methods used for the identification of the condition?
7. Was the condition measured in a standard, reliable way for all participants?
8. Was there appropriate statistical analysis?
9. Was the response rate adequate, and if not, was the low response rate managed appropriately?

Table S2. Univariable and multivariable meta-regression analysis of anti-HEV IgM positive rates

| Variable                             | Univariable regression     |          | Multivariable regression   |         |                   |
|--------------------------------------|----------------------------|----------|----------------------------|---------|-------------------|
|                                      | $\beta$ (95%CI)            | P value  | $\beta$ (95%CI)            | P value | OR (95%CI)        |
| <b>Population</b>                    |                            |          |                            |         |                   |
| The general population (reference)   |                            |          |                            |         |                   |
| Occupational population <sup>a</sup> | 0.0554 (0.0163, 0.0946)    | 0.0055 * |                            |         |                   |
| Pregnant women <sup>a</sup>          | 0.0675 (0.0306, 0.1044)    | 0.0003 * |                            |         |                   |
| Hospital attendees                   | 0.0683 (0.0307, 0.1059)    | 0.0004 * | -0.0399 (-0.0805, 0.0006)  | 0.0535  |                   |
| Volunteer blood donors               | 0.0402 (0.0134, 0.0670)    | 0.0033 * | 0.0365 (-0.0147, 0.0878)   | 0.1624  |                   |
| <b>Age (yr)</b>                      |                            |          |                            |         |                   |
| 0-9 (reference)                      |                            |          |                            |         |                   |
| 10-19                                | -0.0112 (-0.0887, -0.0663) | 0.7769   |                            |         |                   |
| 20-29                                | -0.0161 (-0.0871, -0.0549) | 0.6573   |                            |         |                   |
| 30-39                                | -0.0044 (-0.0753, -0.0664) | 0.9026   |                            |         |                   |
| 40-49                                | 0.0218 (-0.0494, -0.0929)  | 0.5488   |                            |         |                   |
| 50-59                                | 0.0297 (-0.0457, -0.1050)  | 0.4404   |                            |         |                   |
| 60+                                  | 0.0424 (-0.0338, -0.1186)  | 0.2752   |                            |         |                   |
| <b>Gender</b>                        |                            |          |                            |         |                   |
| Female (reference)                   |                            |          |                            |         |                   |
| Male                                 | 0.0018 (-0.0197, 0.0234)   | 0.8669   |                            |         |                   |
| <b>Type of kits</b>                  |                            |          |                            |         |                   |
| Other (reference)                    |                            |          |                            |         |                   |
| WanTai                               | 0.0404 (0.0175, 0.0633)    | 0.0005   | -0.0956 (-0.1499, -0.0413) | 0.0006* | 0.91 (0.86, 0.96) |

---

|                                     |                               |              |                            |         |                      |
|-------------------------------------|-------------------------------|--------------|----------------------------|---------|----------------------|
|                                     | 0.0633)                       | *            | -0.0413)                   |         | 0.96)                |
| <b>Region_1</b>                     |                               |              |                            |         |                      |
| The north(reference)                |                               |              |                            |         |                      |
| The south                           | 0.0298 (0.0081,<br>0.0514)    | 0.0071<br>*  | 0.0583 (0.0282,<br>0.0884) | 0.0001* | 1.06 (1.03,<br>1.09) |
| <b>Region_2</b>                     |                               |              |                            |         |                      |
| Coastal provinces<br>(reference)    |                               |              |                            |         |                      |
| Inland regions                      | -0.0100 (-0.0321,<br>0.0122)  | 0.3788       |                            |         |                      |
| <b>Region_3</b>                     |                               |              |                            |         |                      |
| Other (reference)                   |                               |              |                            |         |                      |
| The west                            | -0.0259 (-0.0502,<br>-0.0016) | 0.0369       |                            |         |                      |
| <b>Study period<sup>a</sup></b>     |                               |              |                            |         |                      |
| 1997-2000 (reference)               |                               |              |                            |         |                      |
| 2001-2005                           | -0.1747 (-0.2832,<br>-0.0663) | 0.0016<br>*  |                            |         |                      |
| 2006-2011                           | -0.2148 (-0.3221,<br>-0.1076) | <0.000<br>1* |                            |         |                      |
| 2012-2017                           | -0.2034 (-0.3104,<br>-0.0964) | 0.0002<br>*  |                            |         |                      |
| 2018-2022                           | -0.2175 (-0.3285,<br>-0.1065) | 0.0001<br>*  |                            |         |                      |
| <b>Urban_rural<br/>distribution</b> |                               |              |                            |         |                      |
| Rural (reference)                   |                               |              |                            |         |                      |
| Urban                               | -0.0142 (-0.0312,<br>0.0028)  | 0.1025       |                            |         |                      |

---
